# Supplementary material
Source: MDPI journal article supplement (https://www.mdpi.com/2071-1050/13/6/3195)
Supplement: s1 [file s1]

## Sheet: Hoja1
PT	AU	BA	BE	GP	AF	BF	CA	TI	SO	SE	BS	LA	DT	CT	CY	CL	SP	HO	DE	ID	AB	C1	RP	EM	RI	OI	FU	FX	CR	NR	TC	Z9	U1	U2	PU	PI	PA	SN	EI	BN	J9	JI	PD	PY	PER	VL	IS	PN	SU
J	Saxenian, A				Saxenian, A			From brain drain to brain circulation: Transnational communities and regional upgrading in India and China	STUDIES IN COMPARATIVE INTERNATIONAL DEVELOPMENT			English	Article								By 2000, over one-third of Silicon Valley's high-skilled workers were foreign-born, and overwhelmingly from Asia. These U.S.-educated engineers are transforming developmental opportunities for formerly peripheral regions as they build professional and business connections to their home countries. In a process more akin to "brain circulation" than "brain drain," these engineers and entrepreneurs, …	Univ Calif Berkeley, Sch Informat Management & Syst, Berkeley, CA 94720 USA; Univ Calif Berkeley, Dept City & Reg Planning, Berkeley, CA 94720 USA	Saxenian, A (corresponding author), Univ Calif Berkeley, Sch Informat Management & Syst, Berkeley, CA 94720 USA.						Basant R, 2003, INDIA IN THE GLOBAL SOFTWARE INDUSTRY: INNOVATION, FIRM STRATEGIES AND DEVELOPMENT, P193; BISWAS S, 1998, SILICONINDIA; CHAN WC, 2002, MCKINSEY Q, V4; CHWANG R, 1997, 7 ANN C SANT CLAR CA; CLENDENIN M, 2003, DEFRIENDING DRAGON E; DESAI A, 2003, DYNAMICS INDIAN INFO; HOBDAY M, 1995, WORLD DEV, V23, P1171, DOI 10.1016/0305-750X(95)00035-B; KURIAN T, 1997, SILICONINDIA; Mahmood IP, 2…	26	368	380	7	106	SPRINGER	NEW YORK	233 SPRING ST, NEW YORK, NY 10013 USA	0039-3606			STUD COMP INT DEV	Stud. Comp. Int. Dev.	SUM	2005	5	40	2
J	Beine, M; Docquier, F; Rapoport, H				Beine, M; Docquier, F; Rapoport, H			Brain drain and economic growth: theory and evidence	JOURNAL OF DEVELOPMENT ECONOMICS			English	Article						brain drain; migration; growth; human capital formation	HUMAN-CAPITAL FORMATION; MIGRATION	We focus on the impact of migration prospects on human capital formation and growth in a small, open developing economy. We assume that agents are heterogeneous in skills and take their educational decisions in a context of uncertainty regarding future migrations. We distinguish two growth effects: an ex ante "brain effect" (migration prospects foster investments in education because of higher re…	Bar Ilan Univ, Dept Econ, IL-52900 Ramat Gan, Israel; Univ Lille 2, CADRE, Lille, France; Bar Ilan Univ, Dept Econ, IL-52900 Ramat Gan, Israel	Rapoport, H (corresponding author), Bar Ilan Univ, Dept Econ, IL-52900 Ramat Gan, Israel.						BALTAGI P, 1995, ECONOMETRIC ANAL PAN; Barro R. J., 1995, EC GROWTH; Bhagwati J., 1974, J DEV ECON, V1, P19, DOI DOI 10.1016/0304-3878(74)90020-0; DOCQUIER F, 1997, M FRENCH EC ASS PAR; Galor Oded, 1997, J ECON GROWTH, V2, P93, DOI DOI 10.1023/A:1009785714248; Hall RE, 1999, Q J ECON, V114, P83, DOI 10.1162/003355399555954; HAQUE NU, 1995, INT MONET FUND S PAP, V42, P577; Hsiao C., 1986, ANAL PAN…	18	361	375	8	106	ELSEVIER SCIENCE BV	AMSTERDAM	PO BOX 211, 1000 AE AMSTERDAM, NETHERLANDS	0304-3878			J DEV ECON	J. Dev. Econ.	FEB	2001	4	64	1
J	Beine, M; Docquier, F; Rapoport, H				Beine, Michel; Docquier, Frederic; Rapoport, Hillel			Brain drain and human capital formation in developing countries: Winners and losers	ECONOMIC JOURNAL			English	Article							ECONOMIC-GROWTH; MIGRATION; EDUCATION	Using new data on emigration rates by education level, we examine the impact of brain drain migration on human capital formation in developing countries. We find evidence of a positive effect of skilled migration prospects on gross human capital formation in a cross-section of 127 countries. For each country of the sample we then estimate the net effect of the brain drain using counterfactual sim…	Univ Luxembourg, Luxembourg, Luxembourg; Univ Libre Bruxelles, Brussels, Belgium; Catholic Univ Louvain, IRES, Louvain, Belgium; Bar Ilan Univ, IL-52100 Ramat Gan, Israel; Univ Lille, EQUIPPE, Lille, France	Beine, M (corresponding author), Univ Luxembourg, Luxembourg, Luxembourg.						Barro R. J., 1995, EC GROWTH; Barro RJ, 2001, OXFORD ECON PAP, V53, P541, DOI 10.1093/oep/53.3.541; Beine M, 2001, J DEV ECON, V64, P275, DOI 10.1016/S0304-3878(00)00133-4; Beine M., 2003, 819 IZA; Bhagwati J., 1974, J DEV ECON, V1, P19, DOI DOI 10.1016/0304-3878(74)90020-0; Carrington W. J., 1998, 98 INT MON FUND; Carrington WJ, 1996, AM ECON REV, V86, P909; Commander S, 2004, NBER CONF R, P235;…	32	305	313	5	106	OXFORD UNIV PRESS	OXFORD	GREAT CLARENDON ST, OXFORD OX2 6DP, ENGLAND	0013-0133	1468-0297		ECON J	Econ. J.	APR	2008	5	118	528
J	Mountford, A				Mountford, A			Can a brain drain be good for growth in the source economy?	JOURNAL OF DEVELOPMENT ECONOMICS			English	Article						brain drain; growth	MIGRANTS PERFORMANCE; RETURN MIGRATION; PROBABILITY	This paper analyzes the interaction between income distribution, human capital accumulation and migration. It shows that when migration is not a certainty, a brain drain may increase average productivity and equality in the source economy even though average productivity is a positive function of past average levels of human capital in an economy. It is also shown how the temporary possibility of…	Univ Southampton, Dept Econ, Southampton SO17 1BJ, Hants, England	Mountford, A (corresponding author), Univ Southampton, Dept Econ, Southampton SO17 1BJ, Hants, England.	mount@soton.ac.uk					BARRO RJ, 1991, Q J ECON, V106, P407, DOI 10.2307/2937943; BECKER GS, 1986, J LABOR ECON, V4, pS1, DOI 10.1086/298118; Bhagwati J., 1974, J DEV ECON, V1, P19, DOI DOI 10.1016/0304-3878(74)90020-0; BUITER WH, 1993, SCAND J ECON, V95, P467, DOI 10.2307/3440907; Coleman J. S., 1966, EQUALITY ED OPPORTUN; GALOR O, 1993, REV ECON STUD, V60, P35, DOI 10.2307/2297811; GALOR O, 1990, INT ECON REV, V31, P…	14	274	278	4	46	ELSEVIER SCIENCE BV	AMSTERDAM	PO BOX 211, 1000 AE AMSTERDAM, NETHERLANDS	0304-3878			J DEV ECON	J. Dev. Econ.	AUG	1997	4	53	2
J	Docquier, F; Rapoport, H				Docquier, Frederic; Rapoport, Hillel			Globalization, Brain Drain, and Development	JOURNAL OF ECONOMIC LITERATURE			English	Article							HUMAN-CAPITAL FORMATION; INTERNATIONAL MIGRATION; ECONOMIC-GROWTH; SKILLED EMIGRATION; EDUCATION; NETWORKS; REMITTANCES; MIGRANTS; IMPACT; TRADE	This paper reviews four decades of economics research on the brain drain, with a focus on recent contributions and on development issues. We first assess the magnitude, intensity, and determinants of the brain drain, showing that brain drain (or high-skill) migration is becoming a dominant pattern of international migration and a major aspect of globalization. We then use a stylized growth model …	[Docquier, Frederic] Catholic Univ Louvain, FNRS, Louvain, Belgium; [Docquier, Frederic] Catholic Univ Louvain, IRES, Louvain, Belgium; [Rapoport, Hillel] Bar Ilan Univ, Dept Econ, IL-52100 Ramat Gan, Israel; [Rapoport, Hillel] Univ Lille, EQUIPPE, Lille, France; [Rapoport, Hillel] Harvard Univ, Ctr Int Dev, Cambridge, MA 02138 USA	Docquier, F (corresponding author), Catholic Univ Louvain, FNRS, Louvain, Belgium.						Acemoglu D, 2005, AM ECON REV, V95, P44, DOI 10.1257/000282805774669916; Acemoglu D, 2005, HANDB ECON, V22, P385; Agrawal A, 2011, J URBAN ECON, V69, P43, DOI 10.1016/j.jue.2010.06.003; Andrew Mountford, 2007, 0407 CTR RES AN MIGR; Angrist JD, 1995, AM ECON REV, V85, P1065; Aroca P, 2005, WORLD BANK ECON REV, V19, P449, DOI 10.1093/wber/lhi017; Awases M, 2003, MIGRATION HLTH PROFE; AZARIADIS C, 1…	146	273	278	18	288	AMER ECONOMIC ASSOC	NASHVILLE	2014 BROADWAY, STE 305, NASHVILLE, TN 37203 USA	0022-0515	2328-8175		J ECON LIT	J. Econ. Lit.	SEP	2012	5	50	3
J	Iredale, R				Iredale, R			The migration of professionals: Theories and typologies	INTERNATIONAL MIGRATION			English	Article								In an historical context, highly skilled migration typically involved the forced movement of professionals as a result of political conflicts, followed by the emergence of the "brain drain" in the 1960s. In the current situation, highly skilled migration represents an increasingly large component of global migration streams. The current state of theory,in relation to highly skilled migration is f…	Univ Wollongong, Sch Geosci, Wollongong, NSW 2500, Australia	Iredale, R (corresponding author), Univ Wollongong, Sch Geosci, Wollongong, NSW 2500, Australia.						AHSAN RM, 2000, ORIENTAL GEOGRAPHER, V44, P17; APPLEYARD R, 1985, IUSSP SEM EM ISS INT; Birrell B., 2001, SKILLED LABOUR GAINS; BOYD M, 2000, WORKING PAPER SERIES; BROWN R, 2001, COMMUNICATION 0218; *COMM AUSTR, 1996, ARR AUSTR PART NZ RE; *COMM REV PRACT EM, 1998, RAC QUAL; CORNELL C, 2001, FINANCIAL POST 0206; DETHLEFS N, 2000, COMMUNICATION; FINDLAY A, 1989, SKILLED SCOTS APPL P; Findlay AM, 1…	34	267	276	6	104	INT ORGANIZATION MIGRATION	GENEVA 19	PO BOX 71, CH-1211 GENEVA 19, SWITZERLAND	0020-7985			INT MIGR	Int. Migr.		2001	4	39	5
J	Grogger, J; Hanson, GH				Grogger, Jeffrey; Hanson, Gordon H.			Income maximization and the selection and sorting of international migrants	JOURNAL OF DEVELOPMENT ECONOMICS			English	Article; Proceedings Paper	Conference on Globalization and the Brain Drain - Theory, Evidence and Policy	DEC 09-11, 2008	Hebrew Univ, Jerusalem, ISRAEL	Bar llan Univ	Hebrew Univ	International migration; Self selection; Wage differentials	SELF-SELECTION; BRAIN-DRAIN; MIGRATION; IMMIGRATION; INEQUALITY; MEXICO	Two prominent features of international labor movements are that the more educated are more likely to emigrate (positive selection) and more educated migrants are more likely to settle in destination countries with high rewards to skill (positive sorting). Using data on emigrant stocks by schooling level and source country in OECD destinations, we find that a simple model of income maximization c…	[Grogger, Jeffrey; Hanson, Gordon H.] NBER, Cambridge, MA 02138 USA; [Grogger, Jeffrey] Univ Chicago, Chicago, IL 60637 USA		gohanson@ucsd.edu					ADAMS RH, 2003, 2972 WORLD BANK; Aghion P, 2009, J MONETARY ECON, V56, P494, DOI 10.1016/j.jmoneco.2009.03.015; Alesina A, 2005, AM ECON REV, V95, P960, DOI 10.1257/0002828054825655; Ashenfelter O., 1999, HDB LABOR EC, V3, P1697, DOI DOI 10.1016/S1573-4463(99)03009-6; Beine M, 2001, J DEV ECON, V64, P275, DOI 10.1016/S0304-3878(00)00133-4; Beine M, 2008, ECON J, V118, P631, DOI 10.1111/j.1468-029…	47	267	268	0	68	ELSEVIER	AMSTERDAM	RADARWEG 29, 1043 NX AMSTERDAM, NETHERLANDS	0304-3878	1872-6089		J DEV ECON	J. Dev. Econ.	MAY	2011	5	95	1
J	Hongoro, C; McPake, B				Hongoro, C; McPake, B			How to bridge the gap in human resources for health	LANCET			English	Article							REIMBURSEMENT METHOD; DEVELOPING-COUNTRIES; BRAIN-DRAIN; CARE; WORKERS	Human resources are the crucial core of a health system, but they have been a neglected component of health-system development. The demands on health systems have escalated in low income countries, in the form of the Millennium Development Goals and new targets for more access to HIV/AIDS treatment. Human resources are in very short supply in health systems in low and middle income countries comp…	Univ London London Sch Hyg & Trop Med, Dept Publ Hlth & Policy, Hlth Policy Unit, London WC1E 7HT, England	McPake, B (corresponding author), Univ London London Sch Hyg & Trop Med, Dept Publ Hlth & Policy, Hlth Policy Unit, Keppel St, London WC1E 7HT, England.	barbara.mcpake@Ishtm.ac.uk		Hongoro, Charles/0000-0002-9715-4940; McPake, Barbara/0000-0002-9904-1077			ANAND S, 2004, IN PRESS LANCET; [Anonymous], 2004, WORLD HLTH REP 2004; Bach S, 2003, INT MIGRATION HLTH W; BIRCH S, 1988, FAM PRACT, V5, P265, DOI 10.1093/fampra/5.4.265; Buchan J., 2003, INT NURSE MOBILITY T; BUCHAN JMD, 2003, GLOBAL WORKFORCE STR, P275; CARVEL J, 2004, GUARDIAN LONDON; Cook CT, 2002, EVAL PROGRAM PLANN, V25, P107, DOI 10.1016/S0149-7189(02)00003-4; Dickson-Tetteh K, 2002, INT …	52	235	239	2	19	ELSEVIER SCIENCE INC	NEW YORK	STE 800, 230 PARK AVE, NEW YORK, NY 10169 USA	0140-6736	1474-547X		LANCET	Lancet	42644	2004	4	364	9443
J	Garrett, L				Garrett, Laurie			The challenge of global health	FOREIGN AFFAIRS			English	Article								Thanks to a recent extraordinary rise in public and private giving, today more money is being directed toward the world's poor and sick than ever before. But unless these efforts start tackling public health in general instead of narrow, disease-specific problems-and unless the brain drain from the developing world can be stopped-poor countries could be pushed even further into trouble, in yet an…									0	235	236	0	22	COUNC FOREIGN RELAT INC	NEW YORK	58 E 68TH ST, NEW YORK, NY 10021 USA	0015-7120			FOREIGN AFF	Foreign Aff.	JAN-FEB	2007	5	86	1
J	Carr, SC; Inkson, K; Thorn, K				Carr, SC; Inkson, K; Thorn, K			From global careers to talent flow: Reinterpreting 'brain drain'	JOURNAL OF WORLD BUSINESS			English	Article							MENTAL-HEALTH; MIGRATION; PSYCHOLOGY; EXPERIENCE; PREJUDICE	Talent flow is a process whereby economically valuable individuals migrate between countries, and is arguably a more important global career influence than international flows of personnel within global organizations. In this article, we reject the term brain drain as too restrictive and focus on the psychology of migration, specifically the economic, political, cultural, family, and career force…	Massey Univ, Sch Psychol, Auckland, New Zealand; Univ Otago, Dept Management, Dunedin, New Zealand	Carr, SC (corresponding author), Massey Univ, Sch Psychol, Private Bag 102 904,N Shore MSC, Auckland, New Zealand.	S.C.Carr@massey.ac.nz; kinkson@business.otago.ac.nz; K.J.Thorn@massey.ac.nz					*ARMS, 2004, WORKSH HELD U QUEENS; Arthur M., 1999, NEW CAREERS INDIVIDU; Arthur M. B., 1996, BOUNDARYLESS CAREER; BALDWIN GB, 1970, FOREIGN AFF, V48, P358, DOI 10.2307/20039447; BAUMGARTNER F, 1993, STUD PSYCHOL, V35, P43; BEDFORD R, 2001, NZ GEOGRAPHER, V57, P37; *BERL IND EC GROUP, 2002, REP EC DOLL CONTR MI; Berry JW, 2001, J SOC ISSUES, V57, P615, DOI 10.1111/0022-4537.00231; BIRD A, 1994, J…	85	215	220	3	78	ELSEVIER SCIENCE INC	NEW YORK	STE 800, 230 PARK AVE, NEW YORK, NY 10169 USA	1090-9516	1878-5573		J WORLD BUS	J. World Bus.	NOV	2005	5	40	4
J	Stark, O; Helmenstein, C; Prskawetz, A				Stark, O; Helmenstein, C; Prskawetz, A			A brain gain with a brain drain	ECONOMICS LETTERS			English	Article						migration; brain drain; skill formation		We study human capital depletion and formation in an economy open to out-migration, as opposed to an economy which is closed. Under the assumption of asymmetric information, the enlarged opportunities and the associated different structure of incentives can give rise to a brain gain in conjunction with a brain drain. Migration by high-skill members of its workforce notwithstanding, the home count…		Stark, O (corresponding author), UNIV OSLO,DEPT ECON,POB 1095 BLINDERN,N-0317 OSLO,NORWAY.						BHAGWATI JN, 1989, INCOME TAXATION MOBI; GRUBEL HB, 1966, AM ECON REV, V56, P268; STARK O, 1995, SCAND J ECON, V97, P55, DOI 10.2307/3440829	3	214	219	1	37	ELSEVIER SCIENCE SA LAUSANNE	LAUSANNE	PO BOX 564, 1001 LAUSANNE, SWITZERLAND	0165-1765			ECON LETT	Econ. Lett.	AUG 29	1997	4	55	2
J	Long, HL; Liu, YS; Li, XB; Chen, YF				Long, Hualou; Liu, Yansui; Li, Xiubin; Chen, Yufu			Building new countryside in China: A geographical perspective	LAND USE POLICY			English	Article						Countryside; Rural restructuring; Geographical perspective; Development strategy; Rural-urban relationships; China	LAND-USE CHANGE; DRIVING FORCES; POST-PRODUCTIVISM; VILLAGE ENTERPRISES; LOCAL-GOVERNMENT; CULTIVATED LAND; WATER-RESOURCES; COASTAL CHINA; YANGTZE-RIVER; RURAL CHINA	The central government of China recently mapped out an important strategy on "building a new countryside" to overall coordinate urban and rural development and gear up national economic growth. This paper analyzes the potential factors influencing the building of a new countryside in China, and provides a critical discussion of the problems and implications concerning carrying out this campaign, …	[Long, Hualou; Liu, Yansui; Li, Xiubin; Chen, Yufu] Chinese Acad Sci, IGSNRR, Beijing 100101, Peoples R China	Liu, YS (corresponding author), Chinese Acad Sci, IGSNRR, 11A Datun Road, Beijing 100101, Peoples R China.	longhl@igsnrr.ac.cn; liuys@igsnrr.ac.cn	LONG, Hualou/AAE-9250-2019; Liu, Yansui/L-7289-2019	LONG, Hualou/0000-0002-9146-2467; Liu, Yansui/0000-0001-6636-7313			*ADB, 2004, POV PROF PEOPL REP C; Arayama Y, 2004, WORLD ECON, V27, P1583, DOI 10.1111/j.1467-9701.2004.00668.x; Beesley K., 2003, NEW COUNTRYSIDE GEOG; Brown L.R., 1995, WHO WILL FEED CHINA; Cai Y, 1990, Land use policy, V7, P337, DOI 10.1016/0264-8377(90)90023-R; Cai Yunlong, 1999, ADV EARTH SCI, V14, P602; Chen BM, 1999, AMBIO, V28, P682; Chen Y, 2005, LAND DEGRAD DEV, V16, P367, DOI 10.1002/l…	97	208	262	18	293	ELSEVIER SCI LTD	OXFORD	THE BOULEVARD, LANGFORD LANE, KIDLINGTON, OXFORD OX5 1GB, OXON, ENGLAND	0264-8377	1873-5754		LAND USE POLICY	Land Use Pol.	APR	2010	5	27	2
J	Meyer, JB				Meyer, JB			Network approach versus brain drain: Lessons from the diaspora	INTERNATIONAL MIGRATION			English	Article							SOCIAL NETWORKS; INTERNATIONAL MIGRATION; CHAIN MIGRATION	For the past two decades, network approaches have led to many conceptual and empirical developments in the studies of international migration as well as of technological innovation. However, surprisingly, such approaches have hardly been used for the study of what is at the intersection of both fields, namely the mobility of highly skilled persons or knowledge workers. This article draws on recen…	Univ Montpellier, CEP, Inst Rech Dev, F-34059 Montpellier, France	Meyer, JB (corresponding author), Univ Montpellier, CEP, Inst Rech Dev, F-34059 Montpellier, France.						AURIOL L, 2001, INT MOBILITY HIGHLY; BANERJEE B, 1983, J DEV AREAS, V17, P185; Becker G. S., 1964, HUMAN CAPITAL; BOYD M, 1989, INT MIGR REV, V23, P638, DOI 10.2307/2546433; BOYER R, 1991, FIGURES IRREVERSIBIL; BROWN M, 2000, BRAIN DRAIN CAPACITY, P90; Callon M., 1990, SOCIOLOGY MONSTERS E, V38, P132, DOI DOI 10.1111/J.1467-954X.1990.TB03351.X; CARRINGTON W, 1998, BIG BRAIN DRAIN; CHARUM J, 1998,…	44	203	205	2	44	WILEY	HOBOKEN	111 RIVER ST, HOBOKEN 07030-5774, NJ USA	0020-7985	1468-2435		INT MIGR	Int. Migr.		2001	4	39	5
J	Ackers, L				Ackers, L			Moving people and knowledge: Scientific mobility in the European Union	INTERNATIONAL MIGRATION			English	Article							BRAIN-DRAIN; MIGRATION	This paper considers the relationship between highly skilled scientific migration (HSM) and the transfer of knowledge within the European Union (EU). To understand these processes we need to conceptualize the phenomenon and then develop appropriate operational tools. HSM engages two key concepts: (1) the concept of skill or knowledge; and (2) the concept of migration. Analysing the impact of HSM …	Univ Leeds, Sch Law, Ctr Study Law & Policy Europe, Leeds, W Yorkshire, England	Ackers, L (corresponding author), Univ Leeds, Sch Law, Ctr Study Law & Policy Europe, Leeds, W Yorkshire, England.						Ackers H. L., 2005, 20051 CSLPE U LEEDS; ACKERS HL, 2005, 20053 CSLPE; ACKERS HL, 2004, COMMUNITY CHILDREN C; ACKERS HL, 2005, GENDER MOBILITY ACAD; ACKERS HL, 2005, INNOVATION EUROPEAN, V18, P277; ACKERS HL, 1998, SHIFTING SPACES GEND; ACKERS HL, 2001, PARTICIPATION WOMEN; Ackers L, 2004, WOMEN STUD INT FORUM, V27, P189, DOI 10.1016/j.wsif.2004.03.001; BALAZ V, 2004, POPULATION SPACE PLA, V0010;…	57	168	177	3	55	WILEY	HOBOKEN	111 RIVER ST, HOBOKEN 07030-5774, NJ USA	0020-7985	1468-2435		INT MIGR	Int. Migr.		2005	5	43	5
J	Hewlett, SA; Luce, CB				Hewlett, SA; Luce, CB			Off-ramps and on ramps - Keeping talented women on the road to success	HARVARD BUSINESS REVIEW			English	Article								Most professional women step off the career fast track at some point. With children to raise, elderly parents to care for, and other pulls on their time, these women are confronted with one off-ramp after another. When they feel pushed at the same time by long hours and unsatisfying work, the decision to leave becomes even easier. But woe to the woman who intends for that exit to be temporary. Th…	Ctr Work Life Policy, New York, NY USA; Columbia Univ, Sch Int & Publ Affairs, Gender & Publ Policy Program, New York, NY USA; Ernst & Young, Hlth Sci Ind Practice, New York, NY USA	Hewlett, SA (corresponding author), Ctr Work Life Policy, New York, NY USA.	cwlp@centerforwork-lifepolicy.org; carolyn.buck-luce@ey.com						0	155	155	1	41	HARVARD BUSINESS SCHOOL PUBLISHING CORPORATION	WATERTOWN	300 NORTH BEACON STREET, WATERTOWN, MA 02472 USA	0017-8012			HARVARD BUS REV	Harv. Bus. Rev.	MAR	2005	5	83	3
J	Mahroum, S				Mahroum, S			Highly skilled globetrotters: mapping the international migration of human capital	R & D MANAGEMENT			English	Article								In the final years of the twentieth century, brain drain, skills shortages and lack of career opportunities have become issues of major concern for policy-makers concerned with R&D in government, academia, and industry. Labour mobility across political borders, especially among highly skilled labour, provides a solution for the aforementioned concerns to some actors, but engenders problems to oth…	Commiss European Communities, Inst Prospect Technol Studies, Joint Res Ctr, World Trade Ctr, Seville 41092, Spain	Mahroum, S (corresponding author), Commiss European Communities, Inst Prospect Technol Studies, Joint Res Ctr, World Trade Ctr, Seville 41092, Spain.	sami.mahroum@jrc.es					*ACTEAM, 1999, UNPUB EUR ENTR PRES; BEAVERSTOCK JV, 1994, GEOFORUM, V25, P323, DOI 10.1016/0016-7185(94)90034-5; BOUVIER L, 1995, FOREIGN BORN SCI ENG; BREWER DJ, 1998, PURSUIT PRESTIGE STR; BURTON L, 1999, MUCH DOES US RELY NO; CobbClark DA, 1997, INT MIGR REV, V31, P670, DOI 10.2307/2547291; Findlay AM, 1996, T I BRIT GEOGR, V21, P49, DOI 10.2307/622923; FINN MG, 1997, STAY RATES FOREIGN D; FIS…	36	154	159	1	69	WILEY	HOBOKEN	111 RIVER ST, HOBOKEN 07030-5774, NJ USA	0033-6807	1467-9310		R&D MANAGE	R D Manage.	JAN	2000	4	30	1
J	Clemens, MA				Clemens, Michael A.			Economics and Emigration: Trillion-Dollar Bills on the Sidewalk?	JOURNAL OF ECONOMIC PERSPECTIVES			English	Article						What is the greatest single class of distortions in the global economy? One contender for this title is the tightly binding constraints on emigration from poor countries. Vast numbers of people in low-income countries want to emigrate from those countries but cannot. How large are the economic losses caused by barriers to emigration? Research on this question has been distinguished by its rarity …	LABOR MOBILITY; BRAIN-DRAIN; IMMIGRATION; RESTRICTIONS; COUNTRIES; GROWTH; WAGES; REMITTANCES; MIGRATION; HISTORY		[Clemens, Michael A.] Ctr Global Dev, Washington, DC USA	Clemens, MA (corresponding author), NYU, Dept Econ, New York, NY 10016 USA.	mclemens@cgdev.org					Acemoglu D, 2004, J POLIT ECON, V112, P497, DOI 10.1086/383100; Ambrosini J.William, 2011, 16912 NBER; Amuedo-Dorantes C, 2004, WORLD DEV, V32, P1407, DOI 10.1016/j.worlddev.2004.02.004; Anderson JE, 2004, J ECON LIT, V42, P691, DOI 10.1257/0022051042177649; Anderson K, 2005, WORLD ECON, V28, P1301, DOI 10.1111/j.1467-9701.2005.00735.x; Anderson Kym, 2000, 3 ANN C GLOB EC AN H; [Anonymous], 2009,…	121	154	154	0	32	AMER ECONOMIC ASSOC	NASHVILLE	2014 BROADWAY, STE 305, NASHVILLE, TN 37203 USA	0895-3309	1944-7965		J ECON PERSPECT	J. Econ. Perspect.	SUM	2011	5	25	3
J	de Arellano, ABR				Ramirez de Arellano, Annette B.			Patients without borders: The emergence of medical tourism	INTERNATIONAL JOURNAL OF HEALTH SERVICES			English	Article								A growing number of patients from the United States and other developed countries are traveling abroad with the express purpose of obtaining health care, including elective surgery and long-term care. This trend is not innocuous. It can lead developing countries to emphasize technology-intensive tertiary care for foreigners at the expense of basic health care for their citizens. Moreover, it can …		de Arellano, ABR (corresponding author), 3745 Winfield Lane NW, Washington, DC 20007 USA.	aramirez@citizen.org					KHER U, 2006, TIME 0529; LESS G, 2005, TRAVELLING HLTH; MARCELO R, 2003, FINANCIAL TIMES 0702; Rahul R.G. Chinai, 2005, HINDU 0417; SENGUPTA A, 2004, PEOPLES DEMOCRACY, V27	5	150	152	1	95	SAGE PUBLICATIONS LTD	LONDON	1 OLIVERS YARD, 55 CITY ROAD, LONDON EC1Y 1SP, ENGLAND	0020-7314	1541-4469		INT J HEALTH SERV	Int. J. Health Serv.		2007	5	37	1
J	Teferra, D; Altbach, PG				Teferra, D; Altbach, PG			African higher education: Challenges for the 21st century	HIGHER EDUCATION			English	Article						academic freedom; access; Africa; brain drain; funding and finance; gender language; private higher education; student acivism		African higher education, at the beginning of the new millennium, faces unprecedented challenges. Not only is the demand for access unstoppable, especially in the context of Africa's traditionally low postsecondary attendance levels, but higher education is recognized as a key force for modernization and development. Africa's academic institutions face obstacles in providing the education, resear…	Boston Coll, Ctr Int Higher Educ, Chestnut Hill, MA 02467 USA	Teferra, D (corresponding author), Boston Coll, Ctr Int Higher Educ, Camp Hall, Chestnut Hill, MA 02467 USA.	teferra@bc.edu; altbach@bc.edu					Allen G, 2001, J HIST BIOL, V34, P1; Altbach P. G., 1999, PRIVATE PROMETHEUS P; Altbach P.G., 1989, DEPENDENCE AUTONOMY; Altbach P. G., 1987, KNOWLEDGE CONTEXT CO; ATTIEH A, 2003, AFRICAN HIGHER ED IN, P151; BAICHOO R, 2003, AFRICAN HIGHER ED IN, P440; Ben-David Joseph, 1977, CTR LEARNING BRITAIN; BENDAVID J, 1968, FUNDAMENTAL RES U; BOOTH MZ, 2003, AFRICAN HIGHER ED IN, P574; CHIMOMBO JPG, 2003,…	44	148	153	5	34	SPRINGER	DORDRECHT	VAN GODEWIJCKSTRAAT 30, 3311 GZ DORDRECHT, NETHERLANDS	0018-1560	1573-174X		HIGH EDUC	High. Educ.	JAN	2004	4	47	1
J	Kanchanachitra, C; Lindelow, M; Johnston, T; Hanvoravongchai, P; Lorenzo, FM; Nguyen, LH; Wilopo, SA; dela Rosa, JF				Kanchanachitra, Churnrurtai; Lindelow, Magnus; Johnston, Timothy; Hanvoravongchai, Piya; Lorenzo, Fely Marilyn; Nguyen Lan Huong; Wilopo, Siswanto Agus; dela Rosa, Jennifer Frances			Health in Southeast Asia 5 Human resources for health in southeast Asia: shortages, distributional challenges, and international trade in health services	LANCET			English	Article							NURSE MIGRATION; TOURISM	In this paper, we address the issues of shortage and maldistribution of health personnel in southeast Asia in the context of the international trade in health services. Although there is no shortage of health workers in the region overall, when analysed separately, five low-income countries have some deficit. All countries in southeast Asia face problems of maldistribution of health workers, and …	[Kanchanachitra, Churnrurtai] Mahidol Univ, Inst Populat & Social Res, Salaya 73170, Nakhon Pathom, Thailand; [Lindelow, Magnus] World Bank, Viangchan, Laos; [Johnston, Timothy] World Bank, Phnom Penh, Cambodia; [Hanvoravongchai, Piya] Univ London, London Sch Hyg & Trop Med, London, England; [Lorenzo, Fely Marilyn; dela Rosa, Jennifer Frances] Univ Philippines, Manila, Philippines; [Nguyen Lan Hu…	Kanchanachitra, C (corresponding author), Mahidol Univ, Inst Populat & Social Res, Salaya 73170, Nakhon Pathom, Thailand.	prckc@mahidol.ac.th	Hanvoravongchai, Piya/A-1569-2012; Wilopo, Siswanto/AAJ-2092-2020	Hanvoravongchai, Piya/0000-0003-4256-1271; Wilopo, Siswanto/0000-0003-1284-7228	China Medical Board; Rockefeller Foundation; Atlantic Philanthropies	The paper is part of a Series funded by the China Medical Board, the Rockefeller Foundation, and Atlantic Philanthropies. We thank the steering committee of this Series on health in southeast Asia, in particular Lincoln Chen and Suwit Wibulpolprasert for providing invaluable comments on the framework and draft paper. We also thank Theirs Theirs Htey (Department of Health, Myanmar) for providing i…	Anand S, 2004, LANCET, V364, P1603, DOI 10.1016/S0140-6736(04)17313-3; [Anonymous], U HLTH SCI STRAT PLA; [Anonymous], 2009, IND DOCT MIDW NURS C; Arunanondchai J, 2006, HEALTH PROMOT INT, V21, P59, DOI 10.1093/heapro/dal052; Bhargava A, 2010, MODELING EFFEC UNPUB; Callaghan M, 2010, HUM RESOUR HEALTH, V8, DOI 10.1186/1478-4491-8-8; Chen L, 2004, LANCET, V364, P1984, DOI 10.1016/S0140-6736(04)174…	61	147	150	1	79	ELSEVIER SCIENCE INC	NEW YORK	STE 800, 230 PARK AVE, NEW YORK, NY 10169 USA	0140-6736	1474-547X		LANCET	Lancet	FEB-MAR	2011	5	377	9767
J	Schneider, H; Blaauw, D; Gilson, L; Chabikuli, N; Goudge, J				Schneider, Helen; Blaauw, Duane; Gilson, Lucy; Chabikuli, Nzapfurundi; Goudge, Jane			Health systems and access to antiretroviral drugs for HIV in southern Africa: Service delivery and human resources challenges	REPRODUCTIVE HEALTH MATTERS			English	Article						HIV antiretroviral drugs; scale up of treatment and services; health systems; southern Africa	PRIMARY-CARE; THERAPY; KHAYELITSHA; PERFORMANCE; ADHERENCE; AGENDA; POLICY	Without strengthened health systems, significant access to antiretroviral (ARV) therapy in many developing countries is unlikely to be achieved. This paper reflects on systemic challenges to scaling up ARV access in countries with both massive epidemics and weak health systems. It draws on the authors' experience in southern Africa and the World Health Organization's framework on health system pe…	Univ Witwatersrand, Ctr Hlth Policy, Johannesburg, South Africa; London Sch Hyg & Trop Med, Hlth Policy Unit, London WC1, England	Schneider, H (corresponding author), Univ Witwatersrand, Ctr Hlth Policy, Johannesburg, South Africa.	Helen.Schneider@nhls.ac.za	Gilson, Lucy/R-8846-2019	Gilson, Lucy/0000-0002-2775-7703; Goudge, Jane/0000-0001-6555-7510			BLAAUW D, ORG RELATIONSHIPS SO; Bodenheimer T, 2002, JAMA-J AM MED ASSOC, V288, P1909, DOI 10.1001/jama.288.15.1909; Bryce J, 2003, LANCET, V362, P159, DOI 10.1016/S0140-6736(03)13870-6; CASSELS A, 1997, GUIDE SECTOR WIDE AP; Chen L, 2005, B WORLD HEALTH ORGAN, V83, P243; Chen L, 2004, LANCET, V364, P1984, DOI 10.1016/S0140-6736(04)17482-5; Coetzee D, 2004, AIDS, V18, P887, DOI [10.1097/00002030-…	45	139	140	0	14	TAYLOR & FRANCIS LTD	ABINGDON	2-4 PARK SQUARE, MILTON PARK, ABINGDON OR14 4RN, OXON, ENGLAND	0968-8080	1460-9576		REPROD HEALTH MATTER	Reprod. Health Matters	MAY	2006	5	14	27
J	Javorcik, BS; Ozden, C; Spatareanu, M; Neagu, C				Javorcik, Beata S.; Oezden, Caglar; Spatareanu, Mariana; Neagu, Cristina			Migrant networks and foreign direct investment	JOURNAL OF DEVELOPMENT ECONOMICS			English	Article						Migration; Foreign direct investment; Brain drain	SOCIAL NETWORKS; TRADE; FDI; DETERMINANTS; IMMIGRATION; BUSINESS; COUNTRY; EXPORT; LINKS	Although there exists a sizeable literature documenting the importance of ethnic networks for international trade, little attention has been devoted to studying the effects of migrants on foreign direct investment (FDI). The presence of migrants can stimulate FDI by promoting information flows across international borders and by serving as a contract enforcement mechanism. This paper investigates…	[Javorcik, Beata S.] Univ Oxford, Dept Econ, Oxford OX1 3UQ, England; [Javorcik, Beata S.] CEPR, London, England; [Oezden, Caglar; Neagu, Cristina] World Bank, Dev Econ Res Grp DECRG, Washington, DC 20433 USA; [Spatareanu, Mariana] Rutgers State Univ, Dept Econ, Newark, NJ 07102 USA	Javorcik, BS (corresponding author), Univ Oxford, Dept Econ, Oxford OX1 3UQ, England.	beata.javorcik@economics.ox.ac.uk; cozden@worldbank.org; marianas@andromeda.rutgers.edu					Aitken B, 1997, J INT ECON, V43, P103, DOI 10.1016/S0022-1996(96)01464-X; Alfaro L, 2004, J INT ECON, V64, P89, DOI 10.1016/S0022-1996(03)00081-3; Arnold JM, 2009, J INT ECON, V79, P42, DOI 10.1016/j.jinteco.2009.05.004; Bhattacharya U, 2008, J FINANC MARK, V11, P228, DOI 10.1016/j.finmar.2008.01.004; Buch CM, 2006, EUR ECON REV, V50, P2017, DOI 10.1016/j.euroecorev.2005.11.002; *CIA, 2006, WORLD…	48	134	137	3	44	ELSEVIER	AMSTERDAM	RADARWEG 29, 1043 NX AMSTERDAM, NETHERLANDS	0304-3878	1872-6089		J DEV ECON	J. Dev. Econ.	MAR	2011	5	94	2
J	Jonkers, K; Tijssen, R				Jonkers, Koen; Tijssen, Robert			Chinese researchers returning home: Impacts of international mobility on research collaboration and scientific productivity	SCIENTOMETRICS			English	Article							BRAIN-DRAIN; MIGRATION; GROWTH	The aim of this study is to contribute to the debate on the relationship between scientific mobility and international collaboration. This case study deals with leading Chinese researchers in the field of plant molecular life sciences who returned to their home country. A correlation analysis of their mobility history, publication output, and international co-publication data, shows the relations…	[Jonkers, Koen] CSIC, Inst Publ Goods & Policies, SPRI Res Grp, E-28037 Madrid, Spain; [Jonkers, Koen] European Univ Inst, Dept Social & Polit Sci, Fiesole, Italy; [Tijssen, Robert] Leiden Univ, Ctr Sci & Technol Studies, Leiden, Netherlands	Jonkers, K (corresponding author), CSIC, Inst Publ Goods & Policies, SPRI Res Grp, C Albasanz 26-28, E-28037 Madrid, Spain.	kjonkers@eui.eu	Tijssen, Robert/B-2397-2009		Dutch Ministry of Education Science and Culture at the European University Institute	The authors are grateful to Rikard Stankiewicz for comments and feedback on earlier versions of this paper. It has also benefited from comments and suggestions from the participants in the workshop on the Global Political Economy of the Research System held at the European University Institute in San Domenico di Fiesole on May 18, 2007 and the workshop on "Methodological Issues in the use of CV d…	Bozeman B, 2004, RES POLICY, V33, P599, DOI 10.1016/j.respol.2004.01.008; Bozeman B, 2001, INT J TECHNOL MANAGE, V22, P716, DOI 10.1504/IJTM.2001.002988; Canibano C, 2008, RES EVALUAT, V17, P17, DOI 10.3152/095820208X292797; CAO C, 2004, CHINAS EFFORTS TURNI; Cao X, 1996, COMPARE, V26, P269; Cassarino Jean Pierre, 2004, EUI WORKING PAPERS; CERVANTES M, 2002, BRAIN DRAIN OLD MYTH; Dietz J. S., 200…	47	130	139	4	96	SPRINGER	DORDRECHT	VAN GODEWIJCKSTRAAT 30, 3311 GZ DORDRECHT, NETHERLANDS	0138-9130	1588-2861		SCIENTOMETRICS	Scientometrics	NOV	2008	5	77	2
J	Nchinda, TC				Nchinda, TC			Research capacity strengthening in the South	SOCIAL SCIENCE & MEDICINE			English	Article						capacity development; training; sustainability; institutional support; brain drain; networks; partnerships; leadership		Active promotion of evidence-based decision-making at all levels of the health field is a necessary step in the direction of improving the health of the population. Recent studies have shown that the burden of disease in developing countries is high particularly the burden of infectious, communicable and non-communicable diseases and health problems of mothers and children. There is presently, a …	WHO, Global Forum Hlth Res, CH-1211 Geneva, Switzerland	Nchinda, TC (corresponding author), WHO, Global Forum Hlth Res, CH-1211 Geneva, Switzerland.						[Anonymous], 1990, HLTH RES ESS LINK EQ; DANIDA, 1992, EV REP BIL PROGR ENH; Kristensen TK, 1996, REV SELECTED COUNTRI; Report of the Ad Hoc Committee on Health Research Relating to Future Intervention Options, 1996, INV HLTH RES DEV; *UNESCO, 1996, WORLD SCI REP 1996; *WHO TDR, 1988, TROP DIS RES GLOB PA; YACH D, 1990, INT J EPIDEMIOLOGY, V21; 1997, INT C MAL AF FIN REP	8	124	127	1	11	PERGAMON-ELSEVIER SCIENCE LTD	OXFORD	THE BOULEVARD, LANGFORD LANE, KIDLINGTON, OXFORD OX5 1GB, ENGLAND	0277-9536			SOC SCI MED	Soc. Sci. Med.	JUN	2002	4	54	11
J	Vidal, JP				Vidal, JP			The effect of emigration on human capital formation	JOURNAL OF POPULATION ECONOMICS			English	Article						emigration; human capital; overlapping generations	INTERNATIONAL LABOR MIGRATION; ECONOMIC-DEVELOPMENT; TIME PREFERENCE; BRAIN-DRAIN; INCOME; GROWTH	This paper focuses on a possible effect of emigration on human capital formation. Emigration to a higher returns to skill country provides an incentive to invest in human capital. The level of human capital formation in the source country can therefore be positively correlated with the probability of emigration. Incidentally a surge in emigration can lead the source country out of an under-develo…	CNRS, GREQAM, F-13002 Marseille, France; Univ Cambridge, Dept Appl Econ, Cambridge CB3 9DE, England	Vidal, JP (corresponding author), CNRS, GREQAM, 2 Rue de la Charite, F-13002 Marseille, France.						Ades Alberto, 1997, J ECON GROWTH, V2, P279, DOI DOI 10.1023/A:1009782809329; AZARIADIS C, 1990, Q J ECON, V105, P501, DOI 10.2307/2937797; Azariadis C, 1993, INTERTEMPORAL MACROE; BEINE M, 1998, 983 SIUTE U LILL 2; CHUA HB, 1993, 700 EC GROWTH CTR; Crettez B, 1996, J POPUL ECON, V9, P387; Crettez B, 1998, J POPUL ECON, V11, P149, DOI 10.1007/s001480050061; GALOR O, 1994, MIGRATION: A CHALLENGE F…	24	121	124	0	17	SPRINGER	NEW YORK	233 SPRING ST, NEW YORK, NY 10013 USA	0933-1433			J POPUL ECON	J. Popul. Econ.	DEC	1998	4	11	4
J	Zweig, D				Zweig, David			Competing for talent: China's strategies to reverse the brain drain	INTERNATIONAL LABOUR REVIEW			English	Article								In order to sustain its economic growth, China has been pursuing a number of policies aimed at recovering its expatriate brain power by encouraging scholars living abroad to return. While local government authorities compete to recruit returnees, the central Government has introduced various policies to facilitate repatriation and resettlement, including preferential treatment for housing and res…	Hong Kong Univ Sci & Technol, Ctr Chinas Transnatl Relat, Hong Kong, Hong Kong, Peoples R China; Hong Kong Univ Sci & Technol, Div Social Sci, Hong Kong, Hong Kong, Peoples R China	Zweig, D (corresponding author), Hong Kong Univ Sci & Technol, Ctr Chinas Transnatl Relat, Hong Kong, Hong Kong, Peoples R China.						Borjas GJ, 1996, REV ECON STAT, V78, P165, DOI 10.2307/2109856; CAO C, 2004, 216 NATL U SING E AS; CAO C, 2004, 215 NAT U SING E AS; Cao Cong, 2004, CHINAS SCI ELITE; CHEN CG, 2003, RENCAI HUI GUI YU SH; DICKSON D, 2003, SCI DEV NETWORK 0529; ENGLESBERG P, 1995, GREAT POLICIES STRAT; GU Y, 1999, BEIJING QINGNIAN BAO; Hirschman A.O., 1970, EXIT VOICE LOYALTY R; HU YY, 2004, CHINA DAILY BEI 1222, P…	35	121	122	3	42	WILEY	HOBOKEN	111 RIVER ST, HOBOKEN 07030-5774, NJ USA	0020-7780	1564-913X		INT LABOUR REV	Int. Labour Rev.		2006	5	145	43862
J	Baruch, Y; Budhwar, PS; Khatri, N				Baruch, Yehuda; Budhwar, Pawan S.; Khatri, Naresh			Brain drain: Inclination to stay abroad after studies	JOURNAL OF WORLD BUSINESS			English	Article						brain drain; management education; labor markets' mobility	INTERNATIONAL-BUSINESS; KNOWLEDGE TRANSFER; LABOR-MARKET; MIGRATION; CAREER; ADJUSTMENT; COUNTRIES; CHINA; WORK; JOB	'Brain drain' is a phenomenon in which people of a high level of skills, qualifications, and competence, leave their countries and emigrate. One major case of the brain drain happens when students from developing countries studying in the developed countries decide not to return home after their studies. We examined the reasons for international students' inclination to stay in their host countri…	Univ E Anglia, Sch Management, Norwich NR4 7TJ, Norfolk, England; Aston Univ, Aston Business Sch, Birmingham B4 7ET, W Midlands, England; Univ Missouri, Sch Med, Columbia, MO 65211 USA	Baruch, Y (corresponding author), Univ E Anglia, Sch Management, Norwich NR4 7TJ, Norfolk, England.	y.baruch@uea.ac.uk; p.s.budhwar@aston.ac.uk; khatrin@health.missouri.edu		Budhwar, Pawan/0000-0001-8915-6172; Khatri, Naresh/0000-0003-2341-3003			Ajzen I, 1980, UNDERSTANDING ATTITU; ALTBACH PG, 2004, FOREIGN POLICY, P30, DOI DOI 10.2307/4152974; Arthur M. B, 1996, BOUNDARYLESS CAREER, P3, DOI DOI 10.2307/2393691; Au KY, 2002, J WORLD BUS, V37, P285, DOI 10.1016/S1090-9516(02)00095-0; Baruch Y, 1999, HUM RELAT, V52, P421, DOI 10.1177/001872679905200401; Baruch Y., 1995, Human Systems Management, V14, P313; Baruch Y., 2004, MANAGING CAREERS…	92	121	125	1	95	ELSEVIER SCIENCE INC	NEW YORK	STE 800, 230 PARK AVE, NEW YORK, NY 10169 USA	1090-9516	1878-5573		J WORLD BUS	J. World Bus.	MAR	2007	5	42	1
J	Stark, O				Stark, O			Rethinking the brain drain	WORLD DEVELOPMENT			English	Article						migration; human capital formation; externalities; social welfare		When productivity is fostered by both the individual's human capital and by the average level of human capital in the economy, individuals underinvest in human capital. A strictly positive probability of migration to a richer country, by raising both the level of human capital formed by optimizing individuals in the home country and the average level of human capital of nonmigrants in the country…	Univ Bonn, D-5300 Bonn, Germany; Univ Vienna, A-1010 Vienna, Austria; ESCE Econ & Social Res Ctr, Cologne, Germany	Stark, O (corresponding author), Univ Bonn, D-5300 Bonn, Germany.						Bhagwati J.N., 1989, INCOME TAXATION INT; Carrington William J, 1999, FINANC DEV, V36, P46; GRUBEL HB, 1966, AM ECON REV, V56, P268; SHKOLNIKOV VD, 1995, POTENTIAL ENERGY EME; Stark O, 1998, ECON LETT, V60, P363, DOI 10.1016/S0165-1765(98)00125-6; Stark O, 1997, ECON LETT, V55, P227, DOI 10.1016/S0165-1765(97)00085-2; *WORLD BANK, 1995, WORLD DEV REP 1995	7	120	122	1	22	PERGAMON-ELSEVIER SCIENCE LTD	OXFORD	THE BOULEVARD, LANGFORD LANE, KIDLINGTON, OXFORD OX5 1GB, ENGLAND	0305-750X			WORLD DEV	World Dev.	JAN	2004	4	32	1
J	Docquier, F; Lowell, BL; Marfouk, A				Docquier, Frederic; Lowell, B. Lindsay; Marfouk, Abdeslam			A Gendered Assessment of Highly Skilled Emigration	POPULATION AND DEVELOPMENT REVIEW			English	Article							DEVELOPING-COUNTRIES; FEMALE MIGRANTS; BRAIN-DRAIN; MIGRATION; GROWTH	Although women form a large and increasing proportion of international migrants, women's mobility has generally been overlooked in the literature. Quantifying and characterizing female migration should lead to a better understanding of the forces that shape international migration. We build an original data set providing gender-disaggregated indicators of international migration by educational at…	[Docquier, Frederic] Univ Catholique Louvain, IRES, Louvain, Belgium; [Lowell, B. Lindsay] Georgetown Univ, Inst Study Int Migrat, Washington, DC 20057 USA; [Marfouk, Abdeslam] Univ Libre Bruxelles, Brussels, Belgium							ADAMS RH, 2003, 2972 WORLD BANK; Alders M., 2001, C MEAS MISM POP STAT; Barro RJ, 2001, OXFORD ECON PAP, V53, P541, DOI 10.1093/oep/53.3.541; Basu AM, 2002, WORLD DEV, V30, P1779, DOI 10.1016/S0305-750X(02)00072-4; Behrman JR, 1999, J POLIT ECON, V107, P682, DOI 10.1086/250075; Beine M, 2008, ECON J, V118, P631, DOI 10.1111/j.1468-0297.2008.02135.x; Beine M, 2007, WORLD BANK ECON REV, V21, P249, …	51	120	127	1	34	WILEY-BLACKWELL PUBLISHING, INC	MALDEN	COMMERCE PLACE, 350 MAIN ST, MALDEN 02148, MA USA	0098-7921			POPUL DEV REV	Popul. Dev. Rev.	JUN	2009	5	35	2
J	Al Ariss, A				Al Ariss, Akram			Modes of engagement: migration, self-initiated expatriation, and career development	CAREER DEVELOPMENT INTERNATIONAL			English	Article						Careers; Career development; Expatriates; Migrant workers; Immigration; Ethnic minorities; France	INTERNATIONAL EXPERIENCE; BRAIN-DRAIN; GENDER; WORK; CONTEXT; STAY	Purpose - The paper has two goals. The first is to develop a conceptual framework for analyzing the strategies of internationally mobile professionals in managing barriers to their career development. This framework is developed using Duberley et al's and Richardson's concept of "modes of engagement". The second goal is to better understand the nature of the careers that ethnic minority migrants …	ESC Troyes, Champagne Sch Management, Troyes, France	Al Ariss, A (corresponding author), ESC Troyes, Champagne Sch Management, Troyes, France.	akram.alariss@groupe-esc-troyes.com					Acker J, 2006, GENDER SOC, V20, P441, DOI 10.1177/0891243206289499; Agullo B, 2009, CAREER DEV INT, V14, P148, DOI 10.1108/13620430910950755; Al Ariss A, 2010, THUNDERBIRD INT BUS, V52, P275, DOI 10.1002/tie.20355; Al Ariss A, 2010, MANAGING CULTURAL DIVERSITY IN ASIA: A RESEARCH COMPANION, P56; Arthur M., 1989, HDB CAREER THEORY; Baruch Y, 2007, J WORLD BUS, V42, P99, DOI 10.1016/j.jwb.2006.11.0…	43	115	117	1	73	EMERALD GROUP PUBLISHING LTD	BINGLEY	HOWARD HOUSE, WAGON LANE, BINGLEY BD16 1WA, W YORKSHIRE, ENGLAND	1362-0436	1758-6003		CAREER DEV INT	Career Dev. Int.		2010	5	15	43955
J	MIYAGIWA, K				MIYAGIWA, K			SCALE ECONOMIES IN EDUCATION AND THE BRAIN-DRAIN PROBLEM	INTERNATIONAL ECONOMIC REVIEW			English	Article							MIGRATION			MIYAGIWA, K (corresponding author), UNIV WASHINGTON,SEATTLE,WA 98195, USA.						Atkinson A. B., 1973, ESSAYS MODERN EC, P90; BHAGWATI J, 1976, TAXING BRAIN DRAIN, V1, P33; BHAGWATI J, 1975, J DEVELOPMENT EC, V1, P19; BHAGWATI JN, 1975, J DEV ECON, V2, P195, DOI DOI 10.1016/0304-3878(75)90002-4; BLOMQVIST AG, 1986, INT ECON REV, V27, P165, DOI 10.2307/2526613; Dorfman N., 1988, MASSACHUSETTS MIRACL, P240; DOWTY A, 1987, CLOSED BORDERS; GRUBEL HB, 1966, AM ECON REV, V56, P268;…	28	113	116	0	19	UNIV PENN	PHILADELPHIA	DEPT ECON MCNEIL BLDG CR, PHILADELPHIA, PA 19174	0020-6598			INT ECON REV	Int. Econ. Rev.	AUG	1991	3	32	3
J	Al Ariss, A; Syed, J				Al Ariss, Akram; Syed, Jawad			Capital Mobilization of Skilled Migrants: A Relational Perspective	BRITISH JOURNAL OF MANAGEMENT			English	Article							EXPATRIATE ASSIGNMENT; BRAIN-DRAIN; EXPERIENCES; MANAGEMENT; CAREERS; MIGRATION; WOMEN; FLOW	A central issue for understanding skilled migration in the management literature is human capital. This emphasis ignores other important forms of capital mobilization that skilled migrants from developing countries deploy in dealing with the barriers to their international career mobility. There is therefore a need to develop a holistic understanding of capital mobilization of skilled migrants. I…	[Al Ariss, Akram] Champagne Sch Management, F-10002 Troyes, France; [Syed, Jawad] Univ Kent, Kent Business Sch, Canterbury CT2 7PE, Kent, England	Al Ariss, A (corresponding author), Champagne Sch Management, 217 Ave Pierre Brossolette,BP 710, F-10002 Troyes, France.	akram.alariss@groupe-esc-troyes.com	Al Ariss, Akram/C-1591-2012				Abdelhady D, 2006, IDENTITIES-GLOB STUD, V13, P427, DOI 10.1080/10702890600839595; ABDULKARIM A., 1996, DIASPORA LIBANAISE F; *AG NAT ACC ETR MI, 2007, LIST REG MET OUV PAY; *AG NAT ACC ETR MI, 2007, COH NOTR NOUV POL IM; Al Ariss A, 2010, THUNDERBIRD INT BUS, V52, P275, DOI 10.1002/tie.20355; Al Ariss A, 2010, CAREER DEV INT, V15, P338, DOI 10.1108/13620431011066231; ALARISS A, 2010, POLITICS CU…	53	113	113	2	53	WILEY	HOBOKEN	111 RIVER ST, HOBOKEN 07030-5774, NJ USA	1045-3172	1467-8551		BRIT J MANAGE	BRIT. J. MANAGE.	JUN	2011	5	22	2
J	Stark, O; Helmenstein, C; Prskawetz, A				Stark, O; Helmenstein, C; Prskawetz, A			Human capital depletion, human capital formation, and migration: a blessing or a "curse"?	ECONOMICS LETTERS			English	Article						human capital formation; migration		We specify conditions under which a strictly positive probability of employment in a foreign country raises the level of human capital formed by optimizing workers in the home country. While some workers migrate, "taking along" more human capital than if they had migrated without factoring in the possibility of migration (a form of brain drain), other workers stay at home with more human capital …	Univ Oslo, Dept Econ, N-0317 Oslo, Norway; Univ Vienna, Vienna, Austria; Inst Adv Studies, Vienna, Austria; Austrian Acad Sci, A-1010 Vienna, Austria	Stark, O (corresponding author), Univ Oslo, Dept Econ, POB 1095 Blindern, N-0317 Oslo, Norway.						GALOR O, 1993, 328 I ADV STUD; Stark O, 1997, ECON LETT, V55, P227, DOI 10.1016/S0165-1765(97)00085-2; *WORLD BANK, 1995, WORLD DEV REP 1995	3	110	113	2	16	ELSEVIER SCIENCE SA	LAUSANNE	PO BOX 564, 1001 LAUSANNE, SWITZERLAND	0165-1765			ECON LETT	Econ. Lett.	SEP	1998	4	60	3
J	Gibson, J; McKenzie, D				Gibson, John; McKenzie, David			The microeconomic determinants of emigration and return migration of the best and brightest: Evidence from the Pacific	JOURNAL OF DEVELOPMENT ECONOMICS			English	Article; Proceedings Paper	Conference on Globalization and the Brain Drain - Theory, Evidence and Policy	DEC 09-11, 2008	Hebrew Univ, Jerusalem, ISRAEL	Bar llan Univ	Hebrew Univ	Brain drain; Brain gain; Highly skilled migration; Return migration; Selectivity	SELF-SELECTION	A unique survey which tracks worldwide the best and brightest academic performers from three Pacific countries is used to assess the extent of emigration and return migration among the very highly skilled, and to analyze, at the microeconomic level, the determinants of these migration choices. Although we estimate that the income gains from migration are very large, not everyone migrates and many…	[McKenzie, David] World Bank, Washington, DC 20433 USA; [Gibson, John] Univ Waikato, Hamilton, New Zealand	McKenzie, D (corresponding author), World Bank, Washington, DC 20433 USA.	dmckenzie@worldbank.org	Gibson, John/AAM-6159-2020	Gibson, John/0000-0003-3886-6873			Beine M., 2008, 3398 IZA; Beine M, 2007, WORLD BANK ECON REV, V21, P249, DOI 10.1093/wber/lhm007; Belot M., 2008, 6675 CEPR; Borjas GJ, 1996, REV ECON STAT, V78, P165, DOI 10.2307/2109856; BORJAS GJ, 1987, AM ECON REV, V77, P531; Docquier F., 2005, INT MIGRATION REMITT, P151; Docquier F, 2007, WORLD BANK ECON REV, V21, P193, DOI 10.1093/wber/lhm008; Grogger J, 2011, J DEV ECON, V95, P42, DOI 10.1…	16	110	112	1	24	ELSEVIER	AMSTERDAM	RADARWEG 29, 1043 NX AMSTERDAM, NETHERLANDS	0304-3878	1872-6089		J DEV ECON	J. Dev. Econ.	MAY	2011	5	95	1
J	Agrawal, A; Kapur, D; McHale, J; Oettl, A				Agrawal, Ajay; Kapur, Devesh; McHale, John; Oettl, Alexander			Brain drain or brain bank? The impact of skilled emigration on poor-country innovation	JOURNAL OF URBAN ECONOMICS			English	Article						Knowledge flows; Emigration; Ethnicity; Diaspora	KNOWLEDGE FLOWS; GEOGRAPHIC LOCALIZATION; PATENT CITATIONS; TECHNOLOGY; POLICY	The development prospects of a poor country or region depend in part on its capacity for innovation In turn the productivity of its innovators whom are often concentrated around urban centers depends on their access to technological knowledge The emigration of highly skilled individuals weakens local knowledge networks (brain drain) but may also help remaining innovators access valuable knowledge…	[Agrawal, Ajay] Univ Toronto, Rotman Sch Management, Toronto, ON M5S 3E6, Canada; [Agrawal, Ajay] NBER, Toronto, ON M5S 3E6, Canada; [Kapur, Devesh] Univ Penn, Ctr Adv Study India, Philadelphia, PA 19104 USA; [McHale, John] Natl Univ Ireland, Galway, Ireland; [Oettl, Alexander] Georgia Inst Technol, Coll Management, Atlanta, GA 30308 USA	Agrawal, A (corresponding author), Univ Toronto, Rotman Sch Management, 105 St George St, Toronto, ON M5S 3E6, Canada.			Oettl, Alexander/0000-0001-8908-4674; McHale, John/0000-0001-9132-1528			AGRAWAL A, 2007, 12823 NBER; Agrawal A, 2008, J URBAN ECON, V64, P258, DOI 10.1016/j.jue.2008.01.003; Agrawal A, 2006, J ECON GEOGR, V6, P571, DOI 10.1093/jeg/lbl016; ALBERT MB, 1991, RES POLICY, V20, P251, DOI 10.1016/0048-7333(91)90055-U; Alcacer J, 2006, REV ECON STAT, V88, P774, DOI 10.1162/rest.88.4.774; Andersson R, 2004, J ECON GEOGR, V4, P371, DOI 10.1093/jnlecg/lbh031; Andersson R, 2009,…	51	105	106	5	70	ACADEMIC PRESS INC ELSEVIER SCIENCE	SAN DIEGO	525 B ST, STE 1900, SAN DIEGO, CA 92101-4495 USA	0094-1190	1095-9068		J URBAN ECON	J. Urban Econ.	JAN	2011	5	69	1
J	Docquier, F; Lohest, O; Marfouk, A				Docquier, Frederic; Lohest, Olivier; Marfouk, Abdeslam			Brain drain in developing countries	WORLD BANK ECONOMIC REVIEW			English	Article							GROWTH	An original data set on international migration by educational attainment for 1990 and 2000 is used to analyze the determinants of brain drain from developing countries. The analysis starts with a simple decomposition of the brain drain in two multiplicative components, the degree of openness of sending countries (measured by the average emigration rate) and the schooling gap (measured by the edu…	Catholic Univ Louvain, B-3000 Louvain, Belgium; Georgetown Univ, Study Int Migrat, Washington, DC 20057 USA		docquier@ires.ucl.ac.be; olohest@hotmail.com; marfouk@skynet.be					ADAMS RH, 2003, 2972 WORLD BANK; Alesina A, 2003, J ECON GROWTH, V8, P155, DOI 10.1023/A:1024471506938; Antecol H, 2003, J HUM RESOUR, V38, P192, DOI 10.2307/1558761; Barro RJ, 2001, OXFORD ECON PAP, V53, P541, DOI 10.1093/oep/53.3.541; Baum CF, 2003, STATA J, V3, P1, DOI 10.1177/1536867X0300300101; Beine M, 2001, J DEV ECON, V64, P275, DOI 10.1016/S0304-3878(00)00133-4; BEINE M, IN PRESS EC J; C…	24	104	109	1	24	OXFORD UNIV PRESS	OXFORD	GREAT CLARENDON ST, OXFORD OX2 6DP, ENGLAND	0258-6770	1564-698X		WORLD BANK ECON REV	World Bank Econ. Rev.		2007	5	21	2
J	de Haas, H				de Haas, Hein			The Migration and Development Pendulum: A Critical View on Research and Policy	INTERNATIONAL MIGRATION			English	Article							INTERNATIONAL MIGRATION; MIGRANT REMITTANCES; EUROPE; PERSPECTIVE; LABOR	At the dawn of the new millennium, international development agencies and governments have discovered the potential of migration and remittances to stimulate development in poor countries. However, migration and development is anything but a new topic. The debate about migration and development has swung back and forth like a pendulum, from optimism in the postwar period to deep brain drain pessi…	[de Haas, Hein] Univ Oxford, Dept Int Dev, Oxford OX1 2JD, England; [de Haas, Hein] Univ Oxford, Oxford Martin Sch, Oxford OX1 2JD, England	de Haas, H (corresponding author), Univ Oxford, Dept Int Dev, Oxford OX1 2JD, England.						Adler S., 1981, TURKISH CONUNDRUM EM; Agunias Dovelyn Rannveig, 2006, REMITTANCES DEV TREN; Almeida C. C., 1973, INT MIGR, V11, P112, DOI [10.1111/j.1468-2435.1973.tb00904.x, DOI 10.1111/J.1468-2435.1973.TB00904.X]; BAUER T, 1998, CROSSING BORDERS REG, P95, DOI DOI 10.1002/1099-1220; Castles S, 2004, ETHNIC RACIAL STUD, V27, P205, DOI 10.1080/0141987042000177306; Castles S, 2006, INT MIGR REV, V4…	49	102	107	2	39	WILEY-BLACKWELL	MALDEN	COMMERCE PLACE, 350 MAIN ST, MALDEN 02148, MA USA	0020-7985			INT MIGR	Int. Migr.	JUN	2012	5	50	3
J	Clemens, MA; Pettersson, G				Clemens, Michael A.; Pettersson, Gunilla			New data on African health professionals abroad	HUMAN RESOURCES FOR HEALTH			English	Article								Background: The migration of doctors and nurses from Africa to developed countries has raised fears of an African medical brain drain. But empirical research on the causes and effects of the phenomenon has been hampered by a lack of systematic data on the extent of African health workers' international movements. Methods: We use destination-country census data to estimate the number of African-bo…	[Clemens, Michael A.] Ctr Global Dev, Washington, DC 20036 USA; [Clemens, Michael A.] Georgetown Univ, Publ Policy Inst, Washington, DC 20007 USA; [Pettersson, Gunilla] Univ Sussex, Dept Econ, Brighton BN1 9RE, E Sussex, England	Clemens, MA (corresponding author), Ctr Global Dev, 1776 Massachusetts Ave NW,Suite 301, Washington, DC 20036 USA.	mclemens@cgdev.org; g.pettersson@sussex.ac.uk					ALKIRE S, 2004, MED EXCEPTIONALISM I; *AM MED ASS, PRACT MED US; AWASES M, 2004, MIGRATION HLTH PROFE, P38; *BRIT MED ASS, 2006, NHS ETH RECR POL WEL; DOCQUIER F, 2006, NEW PANEL DATA SET P; *ED COMM FOR MED G, INT MED ED DIR IMED; Hagopian A, 2004, HUM RESOUR HEALTH, V2, P17, DOI [10.1186/1478-4491-2-17, DOI 10.1186/1478-4491-2-17]; JOHNSON J, 2005, ANN REPR M JUN 27; KAPUR D, 2005, GLOBAL HUNT …	16	100	101	0	2	BIOMED CENTRAL LTD	LONDON	CURRENT SCIENCE GROUP, MIDDLESEX HOUSE, 34-42 CLEVELAND ST, LONDON W1T 4LB, ENGLAND	1478-4491			HUM RESOUR HEALTH	Hum. Resour. Health	JAN 10	2008	5	6
J	Mattoo, A; Neagu, IC; Ozden, C				Mattoo, Aaditya; Neagu, Ileana Cristina; Oezden, Caglar			Brain waste? Educated immigrants in the US labor market	JOURNAL OF DEVELOPMENT ECONOMICS			English	Article						migration; assimilation; brain drain; brain waste; education; skilled occupation	SELF-SELECTION; EARNINGS; ASSIMILATION; MIGRATION	This paper investigates the occupational placement of immigrants in the US labor market using census data. We find striking differences among highly educated immigrants from different countries, even after we control for individuals' age, experience and level of education. With some exceptions, educated immigrants from Latin American and Eastern European countries are more likely to end up in uns…	[Mattoo, Aaditya; Neagu, Ileana Cristina; Oezden, Caglar] World Bank, Dev Res Grp DECRG, Washington, DC 20433 USA	Ozden, C (corresponding author), World Bank, Dev Res Grp DECRG, 1818 H St NW, Washington, DC 20433 USA.	amattoo@worldbank.org; neagu@worldbank.org; cozden@worldbank.org					BAKER M, 1994, J LABOR ECON, V12, P369, DOI 10.1086/298349; BHAGWATI J, 1976, BRAIN DRAIN TAXATION; Bhagwati J., 1974, J DEV ECON, V1, P19, DOI DOI 10.1016/0304-3878(74)90020-0; BORJAS GJ, 1985, J LABOR ECON, V3, P463, DOI 10.1086/298065; Borjas GJ, 1996, REV ECON STAT, V78, P165, DOI 10.2307/2109856; BORJAS GJ, 1987, AM ECON REV, V77, P531; BORJAS GJ, 1994, J ECON LIT, V32, P1667; Chiquiar D, 20…	25	96	98	1	32	ELSEVIER	AMSTERDAM	RADARWEG 29, 1043 NX AMSTERDAM, NETHERLANDS	0304-3878	1872-6089		J DEV ECON	J. Dev. Econ.	OCT	2008	5	87	2
J	Mills, EJ; Kanters, S; Hagopian, A; Bansback, N; Nachega, J; Alberton, M; Au-Yeung, CG; Mtambo, A; Bourgeault, IL; Luboga, S; Hogg, RS; Ford, N				Mills, Edward J.; Kanters, Steve; Hagopian, Amy; Bansback, Nick; Nachega, Jean; Alberton, Mark; Au-Yeung, Christopher G.; Mtambo, Andy; Bourgeault, Ivy L.; Luboga, Samuel; Hogg, Robert S.; Ford, Nathan			The financial cost of doctors emigrating from sub-Saharan Africa: human capital analysis	BMJ-BRITISH MEDICAL JOURNAL			English	Article							HEALTH WORKER MIGRATION; BRAIN-DRAIN; PROFESSIONALS; PHYSICIANS; COUNTRIES; NEEDS; CARE; HIV/AIDS; CRISIS; MALAWI	Objective To estimate the lost investment of domestically educated doctors migrating from sub-Saharan African countries to Australia, Canada, the United Kingdom, and the United States. Design Human capital cost analysis using publicly accessible data. Settings Sub-Saharan African countries. Participants Nine sub-Saharan African countries with an HIV prevalence of 5% or greater or with more than o…	[Mills, Edward J.; Kanters, Steve; Alberton, Mark; Bourgeault, Ivy L.] Univ Ottawa, Fac Hlth Sci, Ottawa, ON K1N 6X1, Canada; [Mills, Edward J.; Kanters, Steve] Ctr Evaluat & Clin Epidemiol, Vancouver, BC, Canada; [Hagopian, Amy] Univ Washington, Sch Publ Hlth, Dept Global Hlth, Seattle, WA 98195 USA; [Bansback, Nick] Univ British Columbia, Sch Populat & Publ Hlth, Vancouver, BC V5Z 1M9, Canada; …	Mills, EJ (corresponding author), Univ Ottawa, Fac Hlth Sci, Ottawa, ON K1N 6X1, Canada.	Edward.mills@uottawa.ca	Hogg, Robert S/B-2783-2012	Hogg, Robert S/0000-0003-3463-5488; Bourgeault, Ivy/0000-0002-5113-9243			American Medical Association, 2010, INT MED GRAD AM MED; AusAID, 2010, STAT SUMM 2005 2008; Australian Age Pension, 2006, AUSTR RET AG; Australian Doctor, 2006, NEV SAY RET; Australian Institute of Health and Welfare, 2009, MED LAB FORC 2007; Awases M, 2004, MIGRATION HLTH PROFE; Barnighausen T, 2007, AIDS PATIENT CARE ST, V21, P799, DOI 10.1089/apc.2007.0193; BCCFE, 2010, GLOB ACC HLTH IND AR; B…	54	96	96	0	30	BMJ PUBLISHING GROUP	LONDON	BRITISH MED ASSOC HOUSE, TAVISTOCK SQUARE, LONDON WC1H 9JR, ENGLAND	1756-1833			BMJ-BRIT MED J	BMJ-British Medical Journal	45597	2011	5	343
J	KWOK, V; LELAND, H				KWOK, V; LELAND, H			AN ECONOMIC-MODEL OF THE BRAIN-DRAIN	AMERICAN ECONOMIC REVIEW			English	Article										KWOK, V (corresponding author), UNIV CALIF BERKELEY,GRAD SCH BUSINESS ADM,BERKELEY,CA 94720, USA.						Adams W, 1968, BRAIN DRAIN; AKERLOF GA, 1970, Q J ECON, V84, P488, DOI 10.2307/1879431; BHAGWATI JN, 1976, TAXING BRAIN DRAIN P; CHOROFAS DN, 1968, KNOWLEDGE REVOLUTION; LELAND H, 1980, OCCUPATIONAL LICENSU; LELAND HE, 1977, J FINANC, V32, P371, DOI 10.2307/2326770; LELAND HE, 1979, J POLIT ECON, V87, P1328, DOI 10.1086/260838; NORTH D, 1974, IMMIGRANTS AM LABOR; RILEY JG, 1975, J ECON THEORY, V1…	12	94	98	0	5	AMER ECONOMIC ASSOC	NASHVILLE	2014 BROADWAY, STE 305, NASHVILLE, TN 37203	0002-8282			AM ECON REV	Am. Econ. Rev.		1982	2	72	1
J	Cerdin, JL; Selmer, J				Cerdin, Jean-Luc; Selmer, Jan			Who is a self-initiated expatriate? Towards conceptual clarity of a common notion	INTERNATIONAL JOURNAL OF HUMAN RESOURCE MANAGEMENT			English	Article						conceptual criteria; definition; operational criteria; research agenda; self-initiated expatriates	INTERNATIONAL ASSIGNMENT; CULTURAL ADJUSTMENT; BOUNDARYLESS CAREER; WORK OUTCOMES; BRAIN-DRAIN; MIGRATION; EXPERIENCE; IMMIGRANTS; REASONS; DEMOGRAPHICS	The purpose of this article is to enhance the conceptual coherence of the notion of a self-initiated expatriate (SIE). We propose a definition based on a set of conceptual criteria which differentiates SIEs from other types of international movers. This article defines who an SIE is according to four criteria which must all be fulfilled at the same time: (a) self-initiated international relocatio…	[Cerdin, Jean-Luc] ESSEC Business Sch, Paris, France; [Selmer, Jan] Aarhus Univ, Sch Business & Social Sci, Dept Business Adm, Aarhus, Denmark	Selmer, J (corresponding author), Aarhus Univ, Sch Business & Social Sci, Dept Business Adm, Aarhus, Denmark.	selmer@asb.dk					Al Ariss A., 2012, SELF INITIATED EXPAT, P235; Al Ariss A, 2013, CAREER DEV INT, V18, P78, DOI 10.1108/13620431311305962; Al Ariss A, 2010, THUNDERBIRD INT BUS, V52, P275, DOI 10.1002/tie.20355; Al Ariss A, 2010, CAREER DEV INT, V15, P338, DOI 10.1108/13620431011066231; ALMEER A, 1989, INT STUDIES MANAGEME, V19, P74; Altman Y, 2013, TALENT MANAGEMENT OF SELF-INITIATED EXPATRIATES: A NEGLECTED SOU…	85	93	93	0	41	ROUTLEDGE JOURNALS, TAYLOR & FRANCIS LTD	ABINGDON	4 PARK SQUARE, MILTON PARK, ABINGDON OX14 4RN, OXFORDSHIRE, ENGLAND	0958-5192	1466-4399		INT J HUM RESOUR MAN	Int. J. Hum. Resour. Manag.	42125	2014	5	25	9
J	FRENK, J				FRENK, J			BALANCING RELEVANCE AND EXCELLENCE - ORGANIZATIONAL RESPONSES TO LINK RESEARCH WITH DECISION-MAKING	SOCIAL SCIENCE & MEDICINE			English	Article						HEALTH RESEARCH; ORGANIZATIONAL DESIGN; BRAIN DRAIN; PUBLIC POLICY		Research faces the challenge of balancing relevance to decision making and excellence in the strict adherence to the norms of scientific inquiry. This paper examines the organizational responses that can be undertaken to promote integration of these potentially conflicting goals. We posit that there seem to be structural barriers to effective communication between researchers and decision makers,…		FRENK, J (corresponding author), NATL INST PUBL HLTH,AV UNIV 655,COL STA MA AHUACATITLAN,CUERNAVACA 62508,MORELOS,MEXICO.						Ackoff R.L., 1978, ART PROBLEM SOLVING; BLAU PM, 1973, ORG ACADEMIC WORK; BOBADILLA JL, 1988, HLTH RES MEXICO STRE; Brownlee A T, 1986, J Health Adm Educ, V4, P31; Cochrane A.L., 1972, EFFECTIVENESS EFFICI; DEMENY P, 1988, CTR POLICY STUDIES W, V138; Donabedian A, 1986, J Health Adm Educ, V4, P611; ECEWAN ED, 1973, INT J HLTH SERV, V3, P45; Frenk J, 1987, Health Policy Plan, V2, P17, DOI 10.1093/…	26	90	93	0	8	PERGAMON-ELSEVIER SCIENCE LTD	OXFORD	THE BOULEVARD, LANGFORD LANE, KIDLINGTON, OXFORD, ENGLAND OX5 1GB	0277-9536			SOC SCI MED	Soc. Sci. Med.	DEC	1992	3	35	11
J	Astor, A; Akhtar, T; Matallana, MA; Muthuswamy, V; Olowu, FA; Tallo, V; Lie, RK				Astor, A; Akhtar, T; Matallana, MA; Muthuswamy, V; Olowu, FA; Tallo, V; Lie, RK			Physician migration: views from professionals in Colombia, Nigeria, India, Pakistan and the Philippines	SOCIAL SCIENCE & MEDICINE			English	Article						physician migration; health policy; developing countries; India; Pakistan; Nigeria; Columbia; The Philippines	BRAIN-DRAIN; HEALTH-PROFESSIONALS; DOCTORS	There has been much debate recently about several issues related to the migration of physicians from developing to developed countries. However, few studies have been conducted to address these issues in a systematic fashion. In an attempt to begin the process of generating systematic data, we designed and- distributed a questionnaire addressing several core issues surrounding physician migration…	NIH, Dept Clin Bioeth, Bethesda, MD 20892 USA; Pakistan Med Res Council, Islamabad, Pakistan; Pontif Univ Javeriana, Cendex, Bogota, Colombia; Indian Council Med Res, New Delhi, India; Intellfit Africa Training Ctr, Lagos, Nigeria	Lie, RK (corresponding author), NIH, Dept Clin Bioeth, Room 1C118,Bldg 10, Bethesda, MD 20892 USA.	rlie@cc.nih.gov	Astor, Avi/I-1318-2015	Astor, Avi/0000-0002-4720-1841			BARNETT JR, 1988, SOC SCI MED, V26, P1049, DOI 10.1016/0277-9536(88)90223-7; Bateman C, 2001, S AFR MED J, V91, P544; BUNDRED P, 2000, LANCET, P356; Buske L, 2002, CAN MED ASSOC J, V166, P1320; Chanda R, 2002, B WORLD HEALTH ORGAN, V80, P158; CROASDALE M, 2004, AM MED NEWS 1101; *DEP HLTH, 2001, COD PRACT NHS EMPL I; DUBLIN T, 1972, NEW ENGL J MED, P286; Forcier MB, 2004, HUMAN RESOURCES HLTH, V2…	26	90	93	1	22	PERGAMON-ELSEVIER SCIENCE LTD	OXFORD	THE BOULEVARD, LANGFORD LANE, KIDLINGTON, OXFORD OX5 1GB, ENGLAND	0277-9536			SOC SCI MED	Soc. Sci. Med.	DEC	2005	5	61	12
J	Dustmann, C; Fadlon, I; Weiss, Y				Dustmann, Christian; Fadlon, Itzhak; Weiss, Yoram			Return migration, human capital accumulation and the brain drain	JOURNAL OF DEVELOPMENT ECONOMICS			English	Article; Proceedings Paper	Conference on Globalization and the Brain Drain - Theory, Evidence and Policy	DEC 09-11, 2008	Hebrew Univ, Jerusalem, ISRAEL	Bar llan Univ	Hebrew Univ	Return migration; Human capital accumulation; Comparative advantage; Brain drain	SELF-SELECTION; INTERNATIONAL MIGRATION; IMMIGRANTS; GROWTH; EDUCATION; WAGES	In this paper we present a model that explains migrations as decisions that respond to where human capital can be acquired more efficiently, and where the return to human capital is highest. The basic framework is a dynamic Roy model in which a worker possesses two distinct skills that can be augmented by learning by doing. There are different implicit prices, in different countries and different…	[Dustmann, Christian] UCL, Dept Econ, London WC1E 6BT, England; [Dustmann, Christian] UCL, CReAM, London WC1E 6BT, England; [Fadlon, Itzhak] Harvard Univ, Dept Econ, Cambridge, MA 02138 USA; [Weiss, Yoram] Eitan Berglas Sch Econ Ramat Aviv, IL-69978 Tel Aviv, Israel	Dustmann, C (corresponding author), UCL, Dept Econ, London WC1E 6BT, England.	c.dustmann@ucl.ac.uk					Autor D., 2009, 15116 NBER WP; Barrett A., 2001, ECON SOC REV, V32, P1; Barrett A., 2010, 4736 IZA; Beine M, 2001, J DEV ECON, V64, P275, DOI 10.1016/S0304-3878(00)00133-4; Belot M., 2008, 571 DP AUSTR NAT U; BENPORATH Y, 1967, J POLIT ECON, V75, P352, DOI 10.1086/259291; BHAGWATI J, 1976, BRAIN DRAIN TAXATION; Bijwaard G., 2008, 2008070 TI; Borjas GJ, 1996, REV ECON STAT, V78, P165, DOI 10.2307/…	53	88	92	5	65	ELSEVIER	AMSTERDAM	RADARWEG 29, 1043 NX AMSTERDAM, NETHERLANDS	0304-3878	1872-6089		J DEV ECON	J. Dev. Econ.	MAY	2011	5	95	1
J	Faini, R				Faini, Riccardo			Remittances and the brain drain: Do more skilled migrants remit more?	WORLD BANK ECONOMIC REVIEW			English	Article							IMMIGRANT; GROWTH	In most destination countries, immigration policies are tilted more and more in favor of skilled individuals. Whether this shift hurts economic prospects in sending countries, as argued by the traditional brain drain literature, is somewhat controversial. The most recent literature focuses on the link between skilled out migration and educational achievements in the home country. This article emp…	Univ Roma Tor Vergata, I-00173 Rome, Italy	Faini, R (corresponding author), Univ Roma Tor Vergata, I-00173 Rome, Italy.						ADAMS RH, 1991, ECON DEV CULT CHANGE, V39, P695, DOI 10.1086/451904; Adams RH, 1998, ECON DEV CULT CHANGE, V47, P155, DOI 10.1086/452390; Barro RJ, 2001, OXFORD ECON PAP, V53, P541, DOI 10.1093/oep/53.3.541; Bauer T, 1998, 3 BONN U I STUD LAB; Beine M, 2001, J DEV ECON, V64, P275, DOI 10.1016/S0304-3878(00)00133-4; BEINE M, 2003, 819 BONN U I STUD LA; Bhagwati J., 1974, J DEV ECON, V1, P19, DOI D…	36	87	89	2	20	OXFORD UNIV PRESS	OXFORD	GREAT CLARENDON ST, OXFORD OX2 6DP, ENGLAND	0258-6770			WORLD BANK ECON REV	World Bank Econ. Rev.		2007	5	21	2
J	Kirigia, JM; Gbary, AR; Muthuri, LK; Nyoni, J; Seddoh, A				Kirigia, Joses Muthuri; Gbary, Akpa Raphael; Muthuri, Lenity Kainyu; Nyoni, Jennifer; Seddoh, Anthony			The cost of health professionals' brain drain in Kenya	BMC HEALTH SERVICES RESEARCH			English	Article							WILLINGNESS-TO-PAY; INSURANCE; NIGERIA	Background: Past attempts to estimate the cost of migration were limited to education costs only and did not include the lost returns from investment. The objectives of this study were: (i) to estimate the financial cost of emigration of Kenyan doctors to the United Kingdom (UK) and the United States of America ( USA); (ii) to estimate the financial cost of emigration of nurses to seven OECD coun…	World Hlth Org, Reg Off Africa, Div Hlth Syst & Serv Dev, Hlth Financing & Social Protect Unit, DJoue Rd,POB 06, Brazzaville, Rep Congo; Kenyatta Univ, Sch Publ Hlth, Nairobi, Kenya	Kirigia, JM (corresponding author), World Hlth Org, Reg Off Africa, Div Hlth Syst & Serv Dev, Hlth Financing & Social Protect Unit, DJoue Rd,POB 06, Brazzaville, Rep Congo.	kirigiaj@afro.who.int; Gbarya@afro.who.int; lenitymuthuri@yahoo.co.uk; Nyonij@afro.who.int; Seddoha@afro.who.int					ABELSMITH B, 1994, HEALTH POLICY PLANN, V9, P409, DOI 10.1093/heapol/9.4.409; Asenso-Okyere WK, 1997, HEALTH POLICY, V42, P223, DOI 10.1016/S0168-8510(97)00069-9; Drummond MF, 1997, METHODS EC EVALUATIO; Hagopian A, 2005, SOC SCI MED, V61, P1750, DOI 10.1016/j.socscimed.2005.03.027; Heller P., 2005, UNDERSTANDING FISCAL; Kirigia J M, 2000, Afr J Health Sci, V7, P5; Kirigia JM, 2005, BMC MED ETHIC…	22	82	82	0	18	BMC	LONDON	CAMPUS, 4 CRINAN ST, LONDON N1 9XW, ENGLAND	1472-6963			BMC HEALTH SERV RES	BMC Health Serv. Res.	42917	2006	5	6
J	Kenney, M; Breznitz, D; Murphree, M				Kenney, Martin; Breznitz, Dan; Murphree, Michael			Coming back home after the sun rises: Returnee entrepreneurs and growth of high tech industries	RESEARCH POLICY			English	Article						High skilled immigrants; Innovation; Technology policy; Economic growth; Entrepreneurship	RESEARCH-AND-DEVELOPMENT; SOFTWARE INDUSTRY; SILICON VALLEY; TECHNOLOGY; TAIWAN; STATE; EAST; GLOBALIZATION; IMMIGRATION; INVESTMENT	Recently, the role of returnees in the economic development of various East Asian nations has received much attention. The early literature on the relocation of the most highly trained individuals from a developing nation to a developed nation viewed the phenomena as a "brain drain." Since the 1990s, a new strand of thinking has suggested that for developing nations this was actually a positive p…	[Kenney, Martin] Univ Calif Davis, Dept Human & Community Dev, Davis, CA 95616 USA; [Breznitz, Dan] Georgia Inst Technol, Scheller Coll Business, Atlanta, GA 30332 USA; [Murphree, Michael] Georgia Inst Technol, Sam Nunn Sch Int Affairs, Atlanta, GA 30332 USA	Breznitz, D (corresponding author), Georgia Inst Technol, Scheller Coll Business, Atlanta, GA 30332 USA.	mfkenney@ucdavis.edu; tbvb@gatech.edu; michael.murphree@gatech.edu					Adams W, 1968, BRAIN DRAIN; Amsden Alice H., 2003, LATE DEV TAIWANS UPG; Arora A, 2001, RES POLICY, V30, P1267, DOI 10.1016/S0048-7333(00)00148-7; Athreye SS, 2005, IND CORP CHANGE, V14, P393, DOI 10.1093/icc/dth056; Bassett R, 2009, OSIRIS, V24, P212, DOI 10.1086/605976; Bhagwati J., 1974, J DEV ECON, V1, P19, DOI DOI 10.1016/0304-3878(74)90020-0; Blomstrom M, 1998, J ECON SURV, V12, P247, DOI D…	112	82	87	3	121	ELSEVIER	AMSTERDAM	RADARWEG 29, 1043 NX AMSTERDAM, NETHERLANDS	0048-7333	1873-7625		RES POLICY	Res. Policy	MAR	2013	5	42	2
J	Beine, M; Noel, R; Ragot, L				Beine, Michel; Noel, Romain; Ragot, Lionel			Determinants of the international mobility of students	ECONOMICS OF EDUCATION REVIEW			English	Article						Student mobility; Network effect; Migration costs; Higher education policy	HIGHER-EDUCATION; FOREIGN-STUDENTS; BRAIN-DRAIN	This paper analyzes the determinants of the choice of location of international students. Building on the documented trends in international migration of students, we identify the various factors associated to the attraction of migrants as well as the costs of moving abroad. Using new data capturing the number of students from a large set of origin countries studying in a set of 13 OECD countries…	[Beine, Michel] Univ Luxembourg, L-1511 Luxembourg, Luxembourg; [Beine, Michel] CES IFO, Munich, Germany; [Noel, Romain] Univ Lille 1, F-59655 Villeneuve Dascq, France; [Ragot, Lionel] Univ Paris Ouest, Paris, France; [Ragot, Lionel] CEPII, Paris, France	Beine, M (corresponding author), Univ Luxembourg, 148 Ave Faiencerie, L-1511 Luxembourg, Luxembourg.	michel.beine@uni.lu					Agasisti T., 2007, WORKING PAPER; Anderson JE, 2004, J ECON LIT, V42, P691, DOI 10.1257/0022051042177649; Aslanbeigui N, 1998, J ECON PERSPECT, V12, P171, DOI 10.1257/jep.12.3.171; BARYLA E. R., 2001, ED EC, V9, P269, DOI [10.1080/09645290110086135, DOI 10.1080/09645290110086135]; Beine M., 2012, DETERMINANTS INT MOB; Beine M, 2008, ECON J, V118, P631, DOI 10.1111/j.1468-0297.2008.02135.x; Beine …	46	82	83	4	87	PERGAMON-ELSEVIER SCIENCE LTD	OXFORD	THE BOULEVARD, LANGFORD LANE, KIDLINGTON, OXFORD OX5 1GB, ENGLAND	0272-7757	1873-7382		ECON EDUC REV	Econ. Educ. Rev.	AUG	2014	5	41
J	Belot, MVK; Hatton, TJ				Belot, Michele V. K.; Hatton, Timothy J.			Immigrant Selection in the OECD	SCANDINAVIAN JOURNAL OF ECONOMICS			English	Article						Educational selectivity; Roy model; F22; J61; O5	SELF-SELECTION; BRAIN-DRAIN; DEVELOPING-COUNTRIES; US IMMIGRATION; UNITED-STATES; MIGRATION; MIGRANTS; MEXICO	In this paper, we examine the determinants of educational selectivity in immigration using immigrant stock data for 70 source countries and 21 OECD destination countries, as observed in the year 2000/2001. We develop a variant of the Roy model to estimate the determinants of educational selectivity. Two key findings emerge. First, the effect of the skill premium, which is at the core of the Roy m…	[Belot, Michele V. K.] Univ Oxford, Oxford OX1 1NF, England; [Hatton, Timothy J.] Australian Natl Univ, Canberra, ACT 0200, Australia	Belot, MVK (corresponding author), Univ Oxford, Oxford OX1 1NF, England.	michele.belot@nuffield.ox.ac.uk; tim.hatton@anu.edu.au					Antecol H, 2003, J HUM RESOUR, V38, P192, DOI 10.2307/1558761; Aydemir A. B., 2003, ARE IMMIGRANTS POSIT; Beine M, 2001, J DEV ECON, V64, P275, DOI 10.1016/S0304-3878(00)00133-4; Beine M, 2008, ECON J, V118, P631, DOI 10.1111/j.1468-0297.2008.02135.x; Beine M, 2007, WORLD BANK ECON REV, V21, P249, DOI 10.1093/wber/lhm007; Beine M, 2011, J DEV ECON, V95, P30, DOI 10.1016/j.jdeveco.2009.11.004; Bel…	42	80	80	0	29	WILEY-BLACKWELL	HOBOKEN	111 RIVER ST, HOBOKEN 07030-5774, NJ USA	0347-0520			SCAND J ECON	Scand. J. Econ.		2012	5	114	4
J	Gottlieb, PD; Joseph, G				Gottlieb, Paul D.; Joseph, George			College-to-work migration of technology graduates and holders of doctorates within the United States	JOURNAL OF REGIONAL SCIENCE			English	Article							LOGIT; DISCRETE; MODELS; CHOICE; MOBILITY; IMPACT; GAINS	This study estimates a series of random parameter logit models of the college-to-work migration decisions of technology graduates and holders of doctorates within the United States. We employ detailed information on the migration-relevant characteristics of individuals, as well as on their actual origins and destinations at the metropolitan scale. In addition to its obvious implications for "brai…	Rutgers State Univ, Dept Agr Food & Resource Econ, New Brunswick, NJ 08901 USA; Rutgers State Univ, Dept Econ, New Brunswick, NJ 08901 USA	Gottlieb, PD (corresponding author), Rutgers State Univ, Dept Agr Food & Resource Econ, Cook Off Bldg,55 Dudley Rd, New Brunswick, NJ 08901 USA.	gottlieb@aesop.rutgers.edu; joseph@econ.rutgers.edu	STEWART, J/G-4491-2011				ANGEL DP, 1989, ECON GEOGR, V65, P99, DOI 10.2307/143775; Arnone M., 2003, CHRONICLE HIGHE 0523, V49, pA22; Bagchi-Sen S, 2003, SERV IND J, V23, P136, DOI 10.1080/02642060412331300822; BARFF R, 1991, URBAN GEOGR, V12, P339, DOI 10.2747/0272-3638.12.4.339; Bhat CR, 2003, TRANSPORT RES B-METH, V37, P837, DOI 10.1016/S0191-2615(02)00090-5; Bound J, 2004, J ECONOMETRICS, V121, P143, DOI 10.1016/j.jec…	67	79	79	2	32	WILEY	HOBOKEN	111 RIVER ST, HOBOKEN 07030-5774, NJ USA	0022-4146	1467-9787		J REGIONAL SCI	J. Reg. Sci.	OCT	2006	5	46	4
J	Williams, AM; Balaz, V; Wallace, C				Williams, AM; Balaz, V; Wallace, C			International labour mobility and uneven regional development in Europe - Human capital, knowledge and entrepreneurship	EUROPEAN URBAN AND REGIONAL STUDIES			English	Article						human capital; knowledge; migration; mobility; regions; remittances	GLOBAL CITY; BRAIN-DRAIN; MIGRATION; IMMIGRATION; WORLD; GLOBALIZATION; MIGRANTS; ECONOMY; NETWORK	Economic geographers have tended to neglect human mobility, and yet international labour migration constitutes significant flows that shape and are shaped by institutionally specific economic spaces. Three underlying themes run through the paper. First, the role of social networks in mediating relationships between flows and spaces. Second, the recomposition of the spatiality and temporality of f…	Univ Exeter, Dept Geog, Exeter EX4 4RJ, Devon, England; Inst Forecasting, Bratislava, Slovakia; Inst Adv Studies, Vienna, Austria	Williams, AM (corresponding author), Univ Exeter, Dept Geog, Amory Bldg, Exeter EX4 4RJ, Devon, England.	A.M.Williams@exeter.ac.uk	Balaz, Vladimir/R-9416-2016	Balaz, Vladimir/0000-0002-8132-3789			Alarcon R, 1999, AM BEHAV SCI, V42, P1381, DOI 10.1177/00027649921954958; ALDRICH HE, 1990, ANNU REV SOCIOL, V16, P111, DOI 10.1146/annurev.so.16.080190.000551; Allen J., 1998, RETHINKING REGION; Amin A., 2002, CITIES REIMAGINING U; AMIN A, 2000, OXFORD HDB EC GEOGRA, P671; BAILEY T, 1991, AM SOCIOL REV, V56, P432, DOI 10.2307/2096266; BALLARD R, 2001, IMPACT KINSHIP EC DY; Beaverstock JV, 2000, …	99	78	78	2	43	SAGE PUBLICATIONS LTD	LONDON	1 OLIVERS YARD, 55 CITY ROAD, LONDON EC1Y 1SP, ENGLAND	0969-7764	1461-7145		EUR URBAN REG STUD	Eur. Urban Reg. Stud.	JAN	2004	4	11	1
J	Tung, RL; Lazarova, M				Tung, Rosalie L.; Lazarova, Mila			Brain drain versus brain gain: an exploratory study of ex-host country nationals in Central and East Europe	INTERNATIONAL JOURNAL OF HUMAN RESOURCE MANAGEMENT			English	Article; Proceedings Paper	64th Annual Meeting of the Academy-of-Management	AUG 06-11, 2004	New Orleans, LA	Acad Management		brain drain; brain gain; ex-host country nationals; transitional economies; global competitiveness; human resource management		To fuel further growth and development, many countries in Central and East Europe that have made the transition from socialist to market economies are anxious to reverse the brain drain by attracting their nationals who have studied and/or worked abroad to return. This study seeks to examine the experiences and challenges encountered by nationals upon their return home, after having lived abroad …	Simon Fraser Univ, Burnaby, BC V5A 1S6, Canada	Tung, RL (corresponding author), Simon Fraser Univ, 8888 Univ Dr, Burnaby, BC V5A 1S6, Canada.	tung@sfu.ca; mbl@sfu.ca					BARNATHAN J, 1991, BUS WEEK, V2338, P94; Berry J, 1980, ACCULTURATION THEORY; BERRY JW, 1995, CAN J BEHAV SCI, V27, P301, DOI 10.1037/0008-400X.27.3.301; Cervantes M, 2002, OECD OBSERVER, P40; FELDMAN DC, 1992, J INT BUS STUD, V23, P271, DOI 10.1057/palgrave.jibs.8490268; Gessen M, 1998, NEW REPUBLIC, V219, P14; GHATAK L, 2004, EC TIMES 0715; GIBELMAN M, 2000, NONPROFIT MANAGEMENT, V10, P251, DOI…	26	78	79	4	22	ROUTLEDGE JOURNALS, TAYLOR & FRANCIS LTD	ABINGDON	2-4 PARK SQUARE, MILTON PARK, ABINGDON OX14 4RN, OXON, ENGLAND	0958-5192	1466-4399		INT J HUM RESOUR MAN	Int. J. Hum. Resour. Manag.	NOV	2006	5	17	11
J	Pfeiffer, J; Johnson, W; Fort, M; Shakow, A; Hagopian, A; Gloyd, S; Gimbel-Sherr, K				Pfeiffer, James; Johnson, Wendy; Fort, Meredith; Shakow, Aaron; Hagopian, Amy; Gloyd, Steve; Gimbel-Sherr, Kenneth			Strengthening Health Systems in Poor Countries: A Code of Conduct for Nongovernmental Organizations	AMERICAN JOURNAL OF PUBLIC HEALTH			English	Article							AFRICA; COLLABORATION; ACCESS; CARE; NGOS	The challenges facing efforts in Africa to increase access to antiretroviral HIV reatment underscore the urgent need to strengthen national health systems across the continent. However, donor aid to developing countries continues to be disproportionately channeled to international nongovernmental organizations (NGOs) rather than to ministries of health. The rapid proliferation of NGOs has provoke…	[Pfeiffer, James; Johnson, Wendy; Fort, Meredith; Hagopian, Amy; Gloyd, Steve] Univ Washington, Sch Publ Hlth & Community Med, Dept Hlth Serv, Seattle, WA 98195 USA; [Pfeiffer, James; Gloyd, Steve] Univ Washington, Sch Publ Hlth & Community Med, Dept Global Hlth, Seattle, WA 98195 USA; [Gimbel-Sherr, Kenneth] Univ Washington, Sch Publ Hlth & Community Med, Dept Epidemiol, Seattle, WA 98195 USA	Pfeiffer, J (corresponding author), Univ Washington, Sch Publ Hlth & Community Med, Dept Hlth Serv, Box 357660, Seattle, WA 98195 USA.	jamespf@u.washington.edu		Fort, Meredith/0000-0003-0589-1044	NIAID NIH HHSUnited States Department of Health & Human ServicesNational Institutes of Health (NIH) - USANIH National Institute of Allergy & Infectious Diseases (NIAID) [P30 AI027757] Funding Source: Medline		ABDULRAHEEM T, 2000, NEW INT AUG, P20; ANANG FT, 1994, CHANGING POLITICS NO; [Anonymous], 2004, WORLD HLTH REP 2004; *AUSTR COUNC INT D, 1997, COD COND; BARNETT C, 2001, 33 ABT ASS INC PARTN, P7; Benatar SR, 1998, AM J PUBLIC HEALTH, V88, P295, DOI 10.2105/AJPH.88.2.295; BENATAR SR, 2007, CLIN ETHICS, V2, P2, DOI DOI 10.1258/147775007780267174; *BOTSW COUNC NONG, 2001, COD COND; Buve A, 2003, INT…	66	78	78	1	27	AMER PUBLIC HEALTH ASSOC INC	WASHINGTON	800 I STREET, NW, WASHINGTON, DC 20001-3710 USA	0090-0036			AM J PUBLIC HEALTH	Am. J. Public Health	DEC	2008	5	98	12
J	Kanbur, R; Rapoport, H				Kanbur, R; Rapoport, H			Migration selectivity and the evolution of spatial inequality	JOURNAL OF ECONOMIC GEOGRAPHY			English	Article; Proceedings Paper	Conference on Spatial Disparities in Human Development	JUL, 2003	Helsinki, FINLAND			migration; migration selectivity; migrants' networks; human capital formation; spatial inequality; convergence	BRAIN-DRAIN; ECONOMIC-GROWTH; EDUCATION; NETWORKS	Standard models of labor migration suggest that migration is induced by real income differentials across locations and will, ceteris paribus, serve to reduce those differentials. And yet there is evidence that growing spatial inequality may co-exist with increased migration from poorer to richer areas, at least over certain ranges. At a theoretical level, this raises the question of modeling oppo…	Cornell Univ, Dept Econ, Ithaca, NY 14853 USA; Bar Ilan Univ, Dept Econ, IL-52900 Ramat Gan, Israel; Univ Lille 2, F-59800 Lille, France; Stanford Univ, SCID, Stanford, CA 94305 USA	Kanbur, R (corresponding author), Cornell Univ, Dept Econ, Ithaca, NY 14853 USA.	hillel@mail.biu.ac.il					Antecol H, 2003, J HUM RESOUR, V38, P192, DOI 10.2307/1558761; AZARIADIS C, 1990, Q J ECON, V105, P501, DOI 10.2307/2937797; Bauer T., 2002, 551 IZA; Beine M, 2001, J DEV ECON, V64, P275, DOI 10.1016/S0304-3878(00)00133-4; Beine M., 2003, 819 IZA; Bhagwati J., 1974, J DEV ECON, V1, P19, DOI DOI 10.1016/0304-3878(74)90020-0; Borjas G. J., 1999, HEAVENS DOOR IMMIGRA; Borjas GJ, 1996, REV ECON STAT,…	40	77	84	0	27	OXFORD UNIV PRESS	OXFORD	GREAT CLARENDON ST, OXFORD OX2 6DP, ENGLAND	1468-2702	1468-2710		J ECON GEOGR	J. Econ. Geogr.	JAN	2005	5	5	1
J	Martineau, T; Decker, K; Bundred, P				Martineau, T; Decker, K; Bundred, P			Brain drain of health professionals: from rhetoric to responsible action	HEALTH POLICY			English	Article						migration; health professionals; recruitment; retention strategy	MIGRATION; SERVICE; DOCTORS	The question of the "brain drain" of health professionals has re-emerged since last exposed in 1970s. This paper is based on exploratory studies in Ghana, South Africa and the UK, a literature review and subsequent tracking of contemporary events. It reviews what is currently known about professional migration in the health sector and its impact on health services in poorer countries. The relevan…	Univ Liverpool, Liverpool Sch Trop Med, Int Hlth Res Grp, Liverpool L3 5QA, Merseyside, England; Univ Hamburg, Dept Polit Sci, Hamburg, Germany; Univ Liverpool, Dept Primary Care, Liverpool L69 3BX, Merseyside, England	Martineau, T (corresponding author), Univ Liverpool, Liverpool Sch Trop Med, Int Hlth Res Grp, Pembroke Pl, Liverpool L3 5QA, Merseyside, England.	t.martineau@liv.ac.uk	Martineau, Tim C/G-2258-2015	Martineau, Tim C/0000-0003-4833-3149			Audit Commission, 2002, RECR RET PUBL SERV W; BROWNE A, 2001, GUARDIAN 0529; Buchan J, 1999, J ADV NURS, V30, P818, DOI 10.1046/j.1365-2648.1999.01159.x; BUCHAN J, 2003, MORE NURSES WORKING; Buchan J, 2002, INT RECRUITMENT NURS; Buchan J., 2003, INT NURSE MOBILITY T; BUCHAN J, 2000, INT RECRUITMENT PHYS; BUCHAN J, 1999, HUMAN RESOURCES HLTH, V3; Bundred PE, 2000, LANCET, V356, P245, DOI 10.1016/S…	50	76	76	1	12	ELSEVIER IRELAND LTD	CLARE	ELSEVIER HOUSE, BROOKVALE PLAZA, EAST PARK SHANNON, CO, CLARE, 00000, IRELAND	0168-8510	1872-6054		HEALTH POLICY	Health Policy	OCT	2004	4	70	1
J	Gamlen, A				Gamlen, Alan			Diaspora Institutions and Diaspora Governance	INTERNATIONAL MIGRATION REVIEW			English	Article							BRAIN-DRAIN; INTERNATIONAL MIGRATION; TRANSNATIONAL MIGRATION; WORLD SOCIETY; POLICY; STATE; CITIZENSHIP; MEXICAN; GEOGRAPHIES; NATIONALISM	Why do governments form institutions devoted to emigrants and their descendants in the diaspora? Such institutions have become a regular feature of political life in many parts of the world: Over half all United Nations Member States now have one. Diaspora institutions merit research because they connect new developments in the global governance of migration with new patterns of national and tran…	Victoria Univ Wellington, Wellington, New Zealand	Gamlen, A (corresponding author), Victoria Univ Wellington, Wellington, New Zealand.			Gamlen, Alan John/0000-0003-1432-0526			Agnew J., 2003, GEOPOLITICS REVISION; Agnew JA, 2001, GEOGR Z, V89, P1; Agnew J, 1994, REV INT POLIT ECON, V1, P53, DOI 10.1080/09692299408434268; Agunias D. R., 2012, DEV ROAD MAP ENGAGIN; AGUNIAS DOVELYN RANNVEIG, 2006, ZERO SUM WIN WIN SCE; Agunias Dovelyn Rannveig, 2009, CLOSING DISTANCE GOV; Anderson B., 2002, NEW LEFT REV, V193; Annan K., 2006, ADDRESS K ANNAN SECR; [Anonymous], 2005, MIGR …	186	76	76	1	27	SAGE PUBLICATIONS INC	THOUSAND OAKS	2455 TELLER RD, THOUSAND OAKS, CA 91320 USA	0197-9183	1747-7379		INT MIGR REV	Int. Migr. Rev.	FAL	2014	5	48			1
J	Jenkins, R; Kydd, R; Mullen, P; Thomson, K; Sculley, J; Kuper, S; Carroll, J; Gureje, O; Hatcher, S; Brownie, S; Carroll, C; Hollins, S; Wong, ML				Jenkins, Rachel; Kydd, Robert; Mullen, Paul; Thomson, Kenneth; Sculley, James; Kuper, Susan; Carroll, Joanna; Gureje, Oye; Hatcher, Simon; Brownie, Sharon; Carroll, Christopher; Hollins, Sheila; Wong, Mai Luen			International Migration of Doctors, and Its Impact on Availability of Psychiatrists in Low and Middle Income Countries	PLOS ONE			English	Article							SUB-SAHARAN AFRICA; BRAIN-DRAIN; HEALTH-PROFESSIONALS; PHYSICIANS; SERVICES	Background: Migration of health professionals from low and middle income countries to rich countries is a large scale and long-standing phenomenon, which is detrimental to the health systems in the donor countries. We sought to explore the extent of psychiatric migration. Methods: In our study, we use the respective professional databases in each country to establish the numbers of psychiatrists …	[Jenkins, Rachel; Wong, Mai Luen] Kings Coll London, Inst Psychiat, Hlth Serv & Populat Res Dept, London WC2R 2LS, England; [Kydd, Robert] Univ Auckland, Dept Psychiat & Behav Sci, Auckland 1, New Zealand; [Mullen, Paul] Monash Univ, Dept Forens Sci, Clayton, Vic 3800, Australia; [Thomson, Kenneth] Univ Pittsburgh, Dept Psychiat, Pittsburgh, PA USA; [Sculley, James] S Carolina Sch Med, Dept Neuro…	Jenkins, R (corresponding author), Kings Coll London, Inst Psychiat, Hlth Serv & Populat Res Dept, London WC2R 2LS, England.	r.jenkins@iop.kcl.ac.uk	Redman, James/B-7175-2008; Brownie, Sharon M/U-9754-2019; Jenkins, Rachel/E-4287-2010; Adewuya, Abiodun/N-4997-2017; Jenkins, Rachel/H-2953-2019	Redman, James/0000-0001-5492-2869; Brownie, Sharon M/0000-0001-7204-2451; Jenkins, Rachel/0000-0002-2958-0331; Adewuya, Abiodun/0000-0002-7611-6953; Jenkins, Rachel/0000-0002-2958-0331; Hatcher, Simon/0000-0003-3117-2350; Jenkins, Robert/0000-0001-8500-9044; Fraser, Donald/0000-0003-0102-9342			BUCHAN J., 2006, NURSE MIGRATION COMM; BUCHAN J, 2005, TRENDS FUTURE UNCERT; BUCHAN J, 2006, BOOM BUST UK NURSING; Buchan J., 2004, INT RECRUITMENT HLTH; Chen L, 2004, LANCET, V364, P1984, DOI 10.1016/S0140-6736(04)17482-5; Chisholm D, 2007, LANCET, V370, P1241, DOI 10.1016/S0140-6736(07)61242-2; Dambisya YM, 2007, REV NONFINANCIAL INC; DOVLO D, 2004, I FUT STUD WORKSH GL; Dussault G, 2003, HUM R…	39	71	71	0	15	PUBLIC LIBRARY SCIENCE	SAN FRANCISCO	185 BERRY ST, STE 1300, SAN FRANCISCO, CA 94107 USA	1932-6203			PLOS ONE	PLoS One	38018	2010	5	5	2
J	Baruch, Y; Dickmann, M; Altman, Y; Bournois, F				Baruch, Yehuda; Dickmann, Michael; Altman, Yochanan; Bournois, Frank			Exploring international work: types and dimensions of global careers	INTERNATIONAL JOURNAL OF HUMAN RESOURCE MANAGEMENT			English	Article						expatriate; global career; international career; international HRM	BRAIN-DRAIN; ASSIGNMENTS; MANAGERS; BUSINESS; MODEL; EXPATRIATION; EUROPE	Contemporary global work comprises a wide and growing array of different modes of international work configurations. In this article, we offer a multidimensional framework for conceptual (theoretical and practical) underpinning of these different modes. Building on the extant literature and the Delphi approach, seven dimensions emerged: (i) time of exposure; (ii) intensity of international contac…	[Baruch, Yehuda] Rouen Business Sch, Rouen, France; [Baruch, Yehuda] Middlesex Univ, London N17 8HR, England; [Dickmann, Michael] Cranfield Univ, Cranfield Sch Management, Bedford, England; [Altman, Yochanan] BEM Bordeaux Management Sch, Bordeaux, France; [Altman, Yochanan] London Metropolitan Univ, London, England; [Bournois, Frank] Univ Paris 02, F-75231 Paris 05, France	Baruch, Y (corresponding author), Rouen Business Sch, Rouen, France.	Yehuda.baruch@rouenbs.fr					Al-Rajhi I., 2006, HUMAN RESOURCE PLANN, V29, P15; Altman Y, 2012, BRIT J MANAGE, V23, P589, DOI 10.1111/j.1467-8551.2012.00838.x; Altman Y, 2012, PERS REV, V41, P233, DOI 10.1108/00483481211200051; Andresen M., 2012, SELF INITIATED EXPAT; [Anonymous], 2009, BBC RADIO 4 0602, V4; [Anonymous], 2011, ECONOMIST, P19; Appadurai A, 1990, THEOR CULT SOC, P295, DOI DOI 10.1177/026327690007002017; Arnold…	78	71	72	1	45	ROUTLEDGE JOURNALS, TAYLOR & FRANCIS LTD	ABINGDON	2-4 PARK SQUARE, MILTON PARK, ABINGDON OX14 4RN, OXON, ENGLAND	0958-5192	1466-4399		INT J HUM RESOUR MAN	Int. J. Hum. Resour. Manag.	37043	2013	5	24	12
J	Portes, A				Portes, Alejandro			Migration and development: reconciling opposite views	ETHNIC AND RACIAL STUDIES			English	Article						Transnationalism; circular migration; brain drain; remittances; national development	TRANSNATIONALISM; ORGANIZATIONS; ASSIMILATION; IMMIGRANTS; IDENTITY	In this essay, I review opposite positions on the relationship between migration and the socio-economic development of sending countries and regions, and the theoretical schools that underlie each of them. In order to adjudicate between these competing perspectives, it is necessary to distinguish between the human capital composition of different migrant flows, their duration, and their structura…	Princeton Univ, Dept Sociol, Princeton, NJ 08544 USA	Portes, A (corresponding author), Princeton Univ, Dept Sociol, Wallace Hall, Princeton, NJ 08544 USA.	aportes@princeton.edu					Alarcon R, 1999, AM BEHAV SCI, V42, P1381, DOI 10.1177/00027649921954958; Bean Frank D., 2003, AM NEWCOMERS DYNAMIC; Borjas G.J., 1990, FRIENDS STRANGERS IM; BORJAS GJ, 1989, INT MIGR REV, V23, P457, DOI 10.2307/2546424; Castles S, 2004, INT MIGR REV, V38, P852; CORNELIUS WA, 1998, TEMPORARY WORKERS FU, P384; Cornelius Wayne A., 1998, CROSSINGS MEXICAN IM, P115; Delgado-Wise Raul, 2006, RESHAPING…	46	69	71	1	30	ROUTLEDGE JOURNALS, TAYLOR & FRANCIS LTD	ABINGDON	2-4 PARK SQUARE, MILTON PARK, ABINGDON OX14 4RN, OXON, ENGLAND	0141-9870	1466-4356		ETHNIC RACIAL STUD	Ethn. Racial Stud.		2009	5	32	1
J	Thissen, F; Fortuijn, JD; Strijker, D; Haartsen, T				Thissen, Frans; Fortuijn, Joos Droogleever; Strijker, Dirk; Haartsen, Tialda			Migration intentions of rural youth in the Westhoek, Flanders, Belgium and the Veenkolonien, The Netherlands	JOURNAL OF RURAL STUDIES			English	Article						Rural youth; Migration intentions; Brain drain; Representations; Local attachment; Westhoek (Belgium); Veenkolonien (Netherlands)	PLACE ATTACHMENT; OUT-MIGRATION; LEAVING HOME; CONSEQUENCES; MOBILITY; CHOICES; PEOPLE; URBAN	'Should I stay or should I leave my home region?' is one of the key life course questions that many young people must address as they grow to maturity. Social mobility increasingly presupposes geographical mobility, especially in rural areas. The consequences of the selective out-migration of socially mobile young people ('brain drain') are seen as a threat to the economic development and reputat…	[Thissen, Frans; Fortuijn, Joos Droogleever] Univ Amsterdam, Dept Geog Planning & Int Dev Studies, NL-1018 VZ Amsterdam, Netherlands; [Strijker, Dirk; Haartsen, Tialda] Univ Groningen, Fac Spatial Sci, NL-9700 AV Groningen, Netherlands	Thissen, F (corresponding author), Univ Amsterdam, Dept Geog Planning & Int Dev Studies, Nieuwe Prinsengracht 130, NL-1018 VZ Amsterdam, Netherlands.	J.F.C.M.Thissen@uva.nl	Haartsen, Tialda/AAP-2399-2020				Aassve A, 2002, J EUR SOC POLICY, V12, P259, DOI 10.1177/a028430; BAUMAN Z, 1992, SOCIOL REV, V40, P675, DOI 10.1111/j.1467-954X.1992.tb00407.x; Bjarnason T, 2006, J RURAL STUD, V22, P290, DOI 10.1016/j.jrurstud.2005.09.004; CBS Statline, 2008, REG STAT POP DYN; CHAMPION AG, 1981, POPULATION TRENDS, V26, P20; Cloke P, 1997, CONTESTED COUNTRYSID; COLEMAN JS, 1988, AM J SOCIOL, V94, pS95, DOI 10.10…	62	69	70	2	45	PERGAMON-ELSEVIER SCIENCE LTD	OXFORD	THE BOULEVARD, LANGFORD LANE, KIDLINGTON, OXFORD OX5 1GB, ENGLAND	0743-0167			J RURAL STUD	J. Rural Stud.	OCT	2010	5	26	4
J	Page, J; Plaza, S				Page, John; Plaza, Sonia			Migration remittances and development: A review of global evidence	JOURNAL OF AFRICAN ECONOMIES			English	Article; Proceedings Paper	Workshop of the African-Economic-Research-Consortium	MAY 28-JUN 02, 2005	Nairobi, KENYA	African Econ Res Consortium			HUMAN-CAPITAL FORMATION; INTERNATIONAL MIGRATION; MIGRANT REMITTANCES; LANGUAGE FLUENCY; BRAIN-DRAIN; EMIGRATION; TRADE; IMMIGRATION; INEQUALITY; ECONOMICS	A considerable amount of research has been conducted on the topic of migration and remittances over the last few years. Early studies on immigration policy assumed that migrants leave their countries, settle in a new country, start integrating in their new society, and abandon their ties with their country of origin. Today, however, globalization makes it possible for immigrants to remain connect…	World Bank, Africa Econ, Reg Integrat Dept, Washington, DC 20433 USA	Page, J (corresponding author), World Bank, Africa Econ, Reg Integrat Dept, 1818 H St NW, Washington, DC 20433 USA.	jpage@worldbank.org; splaza@worldbank.org					ABDALLA RD, 2004, HAWALA SOMALI SOC SO; Abella M., 2003, WORLD MIGRATION 2003; Adams Jr. R, 1996, REMITTANCES INCOME D; ADAMS R, 1991, 86 INT FOOD POL RES; ADAMS R, 2004, 3418 WORLD BANK; ADAMS R, 2003, 3179 WORLD BANK; ADAMS R, 2004, DO INT MIGRATION REM; Adams R. H., 2005, DO INT MIGRATION REM; Adams R. H., 2004, REMITTANCES HOUSEHOL; ADAMS RH, 2003, 3069 WORLD BANK; Adams RH, 2005, 3532 WORLD …	220	65	65	1	33	OXFORD UNIV PRESS	OXFORD	GREAT CLARENDON ST, OXFORD OX2 6DP, ENGLAND	0963-8024	1464-3723		J AFR ECON	J. Afr. Econ.	DEC	2006	5	15			2
J	Bradley, S; McAuliffe, E				Bradley, Susan; McAuliffe, Eilish			Mid-level providers in emergency obstetric and newborn health care: factors affecting their performance and retention within the Malawian health system	HUMAN RESOURCES FOR HEALTH			English	Article								Background: Malawi has a chronic shortage of human resources for health. This has a significant impact on maternal health, with mortality rates amongst the highest in the world. Mid-level cadres of health workers provide the bulk of emergency obstetric and neonatal care. In this context these cadres are defined as those who undertake roles and tasks that are more usually the province of internati…	[Bradley, Susan; McAuliffe, Eilish] Univ Dublin Trinity Coll, Ctr Global Hlth, Dublin 2, Ireland	Bradley, S (corresponding author), Univ Dublin Trinity Coll, Ctr Global Hlth, 3-4 Foster Pl, Dublin 2, Ireland.	susan.bradley@tcd.ie; eilish.mcauliffe@tcd.ie		Bradley, Susan/0000-0002-6797-3291			Awases M, 2004, MIGRATION HLTH PROFE; Banda HT, 2006, COUNTRY HLTH EQUITY; BUCHAN J, 2007, HLTH WORKFORCE INNOV; Caffrey M, 2006, ATTRACTING RETAINING; Chen L, 2004, LANCET, V364, P1984, DOI 10.1016/S0140-6736(04)17482-5; Chilopora Garvey, 2007, Hum Resour Health, V5, P17, DOI 10.1186/1478-4491-5-17; Dieleman Marjolein, 2006, Hum Resour Health, V4, P2, DOI 10.1186/1478-4491-4-2; Dovlo D, 2004, HU…	24	65	65	0	14	BIOMED CENTRAL LTD	LONDON	CURRENT SCIENCE GROUP, MIDDLESEX HOUSE, 34-42 CLEVELAND ST, LONDON W1T 4LB, ENGLAND	1478-4491			HUM RESOUR HEALTH	Hum. Resour. Health	43497	2009	5	7
J	Gibson, J; McKenzie, D				Gibson, John; McKenzie, David			Eight Questions about Brain Drain	JOURNAL OF ECONOMIC PERSPECTIVES			English	Article							IMMIGRANTS; FLOWS; LABOR; US	The term "brain drain" dominates popular discourse on high-skilled migration, and for this reason, we use it in this article. However, as Harry Johnson noted, it is a loaded phrase implying serious loss. It is far from clear that such a loss actually occurs in practice; indeed, there is an increasing recognition of the possible benefits that skilled migration can offer both for migrants and for s…	[Gibson, John] Univ Waikato, Hamilton, New Zealand; [McKenzie, David] World Bank, Dev Res Grp, Washington, DC 20433 USA; [McKenzie, David] UCL, Ctr Res & Anal Migrat CReAM, London, England; [McKenzie, David] Inst Study Labor IZA, Bonn, Germany	Gibson, J (corresponding author), Univ Waikato, Hamilton, New Zealand.	jkgibson@waikato.ac.nz; dmckenzie@worldbank.org	Gibson, John/AAM-6159-2020	Gibson, John/0000-0003-3886-6873			ALBRECHT D, 1991, 137 WORLD BANK; Beine M, 2007, WORLD BANK ECON REV, V21, P249, DOI 10.1093/wber/lhm007; Bhagwati J., 1974, J DEV ECON, V1, P19, DOI DOI 10.1016/0304-3878(74)90020-0; Bhargava A, 2008, WORLD BANK ECON REV, V22, P345, DOI 10.1093/wber/lhn005; Bhargava A, 2011, ECON HUM BIOL, V9, P172, DOI 10.1016/j.ehb.2010.12.004; Bollard A, 2011, WORLD BANK ECON REV, V25, P132, DOI 10.1093/wber/…	48	65	66	3	23	AMER ECONOMIC ASSOC	NASHVILLE	2014 BROADWAY, STE 305, NASHVILLE, TN 37203 USA	0895-3309	1944-7965		J ECON PERSPECT	J. Econ. Perspect.	SUM	2011	5	25	3
J	Artuc, E; Docquier, F; Ozden, C; Parsons, C				Artuc, Erhan; Docquier, Frederic; Oezden, Caglar; Parsons, Christopher			A Global Assessment of Human Capital Mobility: The Role of Non-OECD Destinations	WORLD DEVELOPMENT			English	Article						international migration; labor mobility; brain drain		Discussions of high-skilled mobility typically evoke migration patterns from poorer to wealthier countries, which ignore movements to and between developing countries. This paper presents, for the first time, a global overview of human capital mobility through bilateral migration stocks by gender and education in 1990 and 2000, and calculation of nuanced brain drain indicators. Building on newly …	[Artuc, Erhan; Oezden, Caglar] World Bank, Washington, DC 20433 USA; [Docquier, Frederic] IRES Univ Catholique Louvain, Louvain, Belgium; [Docquier, Frederic] FNRS, Molenbeek St Jean, Belgium; [Oezden, Caglar] IZA, Bonn, Germany; [Parsons, Christopher] Univ Oxford, Oxford OX1 2JD, England	Artuc, E (corresponding author), World Bank, 1818 H St NW, Washington, DC 20433 USA.			Artuc, Erhan/0000-0001-9055-7934; Parsons, Christopher/0000-0001-8528-4089			Anderson JE, 2011, ANNU REV ECON, V3, P133, DOI 10.1146/annurev-economics-111809-125114; Artuc E., 2013, 6480 WORLD BANK POL; Artuc E, 2010, AM ECON REV, V100, P1008, DOI 10.1257/aer.100.3.1008; Barro RJ, 2001, OXFORD ECON PAP, V53, P541, DOI 10.1093/oep/53.3.541; Beine M, 2013, SCAND J ECON, V115, P354, DOI 10.1111/j.1467-9442.2012.01733.x; Beine M, 2011, J DEV ECON, V95, P30, DOI 10.1016/j.jdev…	29	65	67	2	73	PERGAMON-ELSEVIER SCIENCE LTD	OXFORD	THE BOULEVARD, LANGFORD LANE, KIDLINGTON, OXFORD OX5 1GB, ENGLAND	0305-750X			WORLD DEV	World Dev.	JAN	2015	6	65
J	Van Lerberghe, W; Conceicao, C; Van Damme, W; Ferrinho, P				Van Lerberghe, W; Conceicao, C; Van Damme, W; Ferrinho, P			When staff is underpaid: dealing with the individual coping strategies of health personnel	BULLETIN OF THE WORLD HEALTH ORGANIZATION			English	Article						health personnel/economics; public sector; salaries and fringe benefits; ethics; job satisfaction; adaptation, psychological; emigration and immigration; career mobility; motivation; employee incentive plans; socioeconomic factors	CARE; DOCTORS; COUNTRIES; PAYMENTS	Health sector workers respond to inadequate salaries and working,conditions by developing various individual "coping strategies"-some, but not all, of which are of a predatory nature. The paper reviews what is known about these practices and their potential consequences (competition for time, brain drain and conflicts of interest). By and large, governments have rarely been proactive in dealing w…	Inst Trop Med Prince Leopold, Dept Publ Hlth, B-2000 Antwerp, Belgium; Univ Nova Lisboa, Escuela Nacl Saude Publ, P-1200 Lisbon, Portugal; Med Sans Frontieres, Phnom Penh, Cambodia; Univ Lisbon, Inst Prevent Med, P-1699 Lisbon, Portugal	Van Lerberghe, W (corresponding author), Inst Trop Med Prince Leopold, Dept Publ Hlth, 155 Natl Str, B-2000 Antwerp, Belgium.		Conceicao, Claudia/J-7377-2013; Ferrinho, Paulo/J-2835-2012; Van Damme, Wim/F-7404-2011	Conceicao, Claudia/0000-0001-7004-0268; Ferrinho, Paulo/0000-0002-3722-0803; Van Lerberghe, Wim/0000-0001-9966-6563			ADAMS O, 2000, STUDIES HLTH SERVICE, V16, P203; Adams O HV, 2000, WHOS WORKSH GLOB HLT; Aljunid S, 1995, HEALTH POLICY PLANN, V10, P333, DOI 10.1093/heapol/10.4.333; Alubo S O, 1990, Med Anthropol, V12, P305; Asiimwe D, 1997, PRIVATE HLTH PROVIDE, P140; AVILES CMI, 2000, STUDIES HLTH SERVICE, V16, P113; Backstrom B, 1998, S AFRICAN FAMILY PRA, V19, P27; Backstrom B, 1999, REV MED MOCAMBIQUE, V7, …	38	64	67	0	12	WORLD HEALTH ORGANIZATION	GENEVA 27	MARKETING AND DISSEMINATION, CH-1211 GENEVA 27, SWITZERLAND	0042-9686			B WORLD HEALTH ORGAN	Bull. World Health Organ.		2002	4	80	7
J	van Dalen, HP; Henkens, K				van Dalen, Hendrik P.; Henkens, Kene			Explaining emigration intentions and behaviour in the Netherlands, 2005-10	POPULATION STUDIES-A JOURNAL OF DEMOGRAPHY			English	Article						emigration; intentions; behaviour; personality; brain drain; Netherlands	MIGRATION DECISION-MAKING; SELF-EFFICACY SCALE; RESIDENTIAL-MOBILITY; SENSATION SEEKING; PERSONALITY; SELECTION; INCOME; IMMIGRATION; PSYCHOLOGY; NETWORKS	We examined the emigration intentions of native-born Dutch residents and their subsequent emigration behaviour from 2005 to 2010. Data were collected from two surveys on emigration intentions, one conducted locally and one nationally. A number of novel results stand out. First, intentions were good predictors of future emigration: 34 per cent of those who had stated an intention to emigrate actua…	[van Dalen, Hendrik P.; Henkens, Kene] NIDI, NL-2502 AR The Hague, Netherlands; [van Dalen, Hendrik P.] Tilburg Univ, Tilburg Sch Econ & Management TISEM, NL-5000 LE Tilburg, Netherlands; [van Dalen, Hendrik P.] Tilburg Univ, CentER, NL-5000 LE Tilburg, Netherlands; [Henkens, Kene] Univ Amsterdam, Dept Sociol & Anthropol, NL-1012 WX Amsterdam, Netherlands	van Dalen, HP (corresponding author), NIDI, POB 11650, NL-2502 AR The Hague, Netherlands.	dalen@nidi.nl	van Dalen, Hendrik P./A-1736-2008; van Dalen, Harry/AAR-5621-2020	van Dalen, Hendrik P./0000-0002-1628-9764; Henkens, Kene/0000-0002-3416-5191			AJZEN I, 1991, ORGAN BEHAV HUM DEC, V50, P179, DOI 10.1016/0749-5978(91)90020-T; Ajzen I, 1980, UNDERSTANDING ATTITU; Becker G., 1975, HUMAN CAPITAL THEORE; Berry JW, 2001, J SOC ISSUES, V57, P615, DOI 10.1111/0022-4537.00231; Borghans L, 2008, J HUM RESOUR, V43, P972; Borjas GJ, 1996, REV ECON STAT, V78, P165, DOI 10.2307/2109856; BORJAS GJ, 1987, AM ECON REV, V77, P531; Borjas GJ, 1991, IMMIGRA…	63	64	65	0	26	ROUTLEDGE JOURNALS, TAYLOR & FRANCIS LTD	ABINGDON	4 PARK SQUARE, MILTON PARK, ABINGDON OX14 4RN, OXFORDSHIRE, ENGLAND	0032-4728			POP STUD-J DEMOG	Popul. Stud.-J. Demogr.	37073	2013	5	67	2
J	Olesen, H				Olesen, H			Migration, return, and development: An institutional perspective	INTERNATIONAL MIGRATION			English	Article								The development community has been rather reluctant in the past to integrate migration as a parameter for development policies, as often advocated by politicians and the migration community. The following analysis demonstrates that the position of development institutions on this matter has evolved, e.g., in the direction of increased interest among development practitioners to look at remittance…								ABELLA M, 1999, INT MIGRATION DEV IN; ABELLA M, 1991, ILO C NIH JAP SEPT; AMMASSAR S, 2001, HARNESSING POTENTIAL; AROWOLO OO, 2000, INT MIGRATION, V38; BOEHNING WR, 1994, AID PLACE MIGRATION; Bonaglia F, 2001, 181 OECD; Borjas G. J., 1999, 438 WORLD BANK; CARRINGTON WJ, 1998, BIG IS BRAIND RAIN; CERASE Francesco, 1974, INT MIGRATION REV, V8; DEHAAN A, 1999, J DEV STUDIES, V36; Djajic S., 2001, IN…	96	63	63	2	13	INT ORGANIZATION MIGRATION	GENEVA 19	PO BOX 71, CH-1211 GENEVA 19, SWITZERLAND	0020-7985			INT MIGR	Int. Migr.		2002	4	40	5
J	Brown, RPC; Connell, J				Brown, RPC; Connell, J			The migration of doctors and nurses from south pacific island nations	SOCIAL SCIENCE & MEDICINE			English	Article						migration; skill drain; Pacific islands; return migration; doctors; nurses	RETURN MIGRATION; UNITED-STATES; BRAIN-DRAIN; MIGRANTS; REMITTANCES; PHYSICIANS; EMIGRATION; AUSTRALIA; SAVINGS; MARKET	Little is known of the structure of the international migration of skilled health professionals. Accelerated migration of doctors and nurses from the Pacific island states of Fiji, Samoa and Tonga to the Pacific periphery is part of the globalization of health care. The findings from a recent survey of 251 doctors and nurses from the three island countries are reported here. Key determinants of b…	Univ Queensland, Sch Econ, Brisbane, Qld 4072, Australia; Univ Sydney, Sch Geosci, Sydney, NSW 2006, Australia	Brown, RPC (corresponding author), Univ Queensland, Sch Econ, Brisbane, Qld 4072, Australia.	r.brown@economics.uq.edu.an					AHLBURG D, 1990, PACIFIC RES MONOGRAP, V23; Ahlburg DA, 1998, J DEV STUD, V35, P125, DOI 10.1080/00220389808422567; AHLBURG DA, 1994, PACIFIC STUDIES, V17, P71; Baer LD, 2000, SOC SCI MED, V50, P317, DOI 10.1016/S0277-9536(99)00293-2; BALL R, 1996, PILIPINAS, V27, P67; Borjas GJ, 1996, REV ECON STAT, V78, P165, DOI 10.2307/2109856; Brown RPC, 1997, WORLD DEV, V25, P613, DOI 10.1016/S0305-750X(96)…	52	63	64	0	19	PERGAMON-ELSEVIER SCIENCE LTD	OXFORD	THE BOULEVARD, LANGFORD LANE, KIDLINGTON, OXFORD OX5 1GB, ENGLAND	0277-9536			SOC SCI MED	Soc. Sci. Med.	JUN	2004	4	58	11
J	HAQUE, NU; KIM, SJ				HAQUE, NU; KIM, SJ			HUMAN-CAPITAL FLIGHT - IMPACT OF MIGRATION ON INCOME AND GROWTH	INTERNATIONAL MONETARY FUND STAFF PAPERS			English	Article							LONG-RUN GROWTH; ECONOMIC-DEVELOPMENT; POLICY	An endogenous growth model with heterogeneous agents is analyzed to show that ''human capital flight'' or ''brain drain'' can lead to a permanent reduction in income and growth of the country of emigration relative to the country of immigration. Convergence between the two is therefore rendered unlikely with such migration. While, in a closed economy, subsidizing human capital accumulation at all…		HAQUE, NU (corresponding author), INT MONETARY FUND,RES DEPT,700 19TH ST NW,WASHINGTON,DC 20431, USA.						Barro R. J., 1995, EC GROWTH; BARRO RJ, 1993, J MONETARY ECON, V32, P363, DOI 10.1016/0304-3932(93)90023-9; BHAGWATI J, 1976, BRAIN DRAIN TAXATION; BHAGWATI J, 1976, TAXING BRAIN DRAIN; Bhagwati J., 1974, J DEV ECON, V1, P19, DOI DOI 10.1016/0304-3878(74)90020-0; CASHIN P, 1995, STAFF PAPERS INT MON, V42, P237; CUDDINGTON JT, 1986, PRINCETON U STUDIES, V58; DEGREGORIO J, 1994, IMF9447 INT MON FUN…	27	62	64	0	12	INT MONETARY FUND	WASHINGTON	700 19TH ST, NW, WASHINGTON, DC 20431	0020-8027			INT MONET FUND S PAP	Int. Monet. Fund Staff Pap.	SEP	1995	4	42	3
J	Bollard, A; McKenzie, D; Morten, M; Rapoport, H				Bollard, Albert; McKenzie, David; Morten, Melanie; Rapoport, Hillel			Remittances and the Brain Drain Revisited: The Microdata Show That More Educated Migrants Remit More	WORLD BANK ECONOMIC REVIEW			English	Article							TRANSFERS; MOTIVES	Two of the most salient trends in migration and development over the last two decades are the large rise in remittances and in the flow of skilled migrants. However, recent literature based on cross-country regressions has claimed that more educated migrants remit less, leading to concerns that further increases in skilled migration will impede remittance growth. Microdata from surveys of immigra…	[McKenzie, David] World Bank, Dev Res Grp, Finance & Private Sector Res Unit, Washington, DC USA; [Bollard, Albert] Stanford Univ, Stanford, CA 94305 USA; [Morten, Melanie] Yale Univ, New Haven, CT 06520 USA; [Rapoport, Hillel] Bar Ilan Univ, IL-52100 Ramat Gan, Israel; [Rapoport, Hillel] Univ Lille, EQUIPPE, Lille, France	McKenzie, D (corresponding author), World Bank, Dev Res Grp, Finance & Private Sector Res Unit, Washington, DC USA.	abollard@stanford.edu; dmckenzie@worldbank.org; morten@yale.edu; hillel@mail.biu.ac.il					ABBASI SUR, 2000, INT J AGRIC BIOL, V2, P222; COX D, 1987, J POLIT ECON, V95, P508, DOI 10.1086/261470; Cox D, 1998, J DEV ECON, V55, P57, DOI 10.1016/S0304-3878(97)00056-4; Docquier F., 2005, INT MIGRATION REMITT, P151; Faini R, 2007, WORLD BANK ECON REV, V21, P177, DOI 10.1093/wber/lhm006; GROENEWOLD G, 2004, POP ASS AM 2004 GEN; *IDB, 2005, SURV COMM MULT INV F; MIOTTI L, 2009, 2 MIGR DEV C WA…	16	62	62	1	22	OXFORD UNIV PRESS	OXFORD	GREAT CLARENDON ST, OXFORD OX2 6DP, ENGLAND	0258-6770			WORLD BANK ECON REV	World Bank Econ. Rev.		2011	5	25	1
J	Beine, M; Docquier, F; Rapoport, H				Beine, Michel; Docquier, Frederic; Rapoport, Hillel			Measuring international skilled migration: A new database controlling for age of entry	WORLD BANK ECONOMIC REVIEW			English	Article								Recent data on international migration of skilled workers define skilled migrants by education level without distinguishing whether they acquired their education in the home or the host country. This article uses immigrants' age of entry as a proxy for where they acquired their education. Data on age of entry are available from a subset of receiving countries that together represent 77 percent of…	Bar Ilan Univ, IL-52100 Ramat Gan, Israel; Univ Libre Bruxelles, Brussels, Belgium; Catholic Univ Louvain, B-3000 Louvain, Belgium; Univ Luxemburg, Luxembourg, Luxembourg	Rapoport, H (corresponding author), Bar Ilan Univ, IL-52100 Ramat Gan, Israel.	mbeine@ulb.ac.be; docquier@ires.ucl.ac.be; hillel@mail.biu.ac.il					ADAMS RH, 2003, 2972 WORLD BANK; Beine M, 2001, J DEV ECON, V64, P275, DOI 10.1016/S0304-3878(00)00133-4; BEINE M, IN PRESS EC J; CARRINGTON WJ, 1998, 98102 INT MON FUND; Docquier F., 2004, 3381 WORLD BANK; Docquier Frederic, 2006, INT MIGRATION REMITT; DUMONT JC, 2004, SOCIAL EMPLOYMENT MI, V25; ROSENZWEIG MR, 2005, UN EXP GROUP M INT M	8	60	61	0	12	OXFORD UNIV PRESS	OXFORD	GREAT CLARENDON ST, OXFORD OX2 6DP, ENGLAND	0258-6770			WORLD BANK ECON REV	World Bank Econ. Rev.		2007	5	21	2
J	Zweig, D; Wang, HY				Zweig, David; Wang, Huiyao			Can China Bring Back the Best? The Communist Party Organizes China's Search for Talent	CHINA QUARTERLY			English	Article						talent; reverse migration; brain drain; brain circulation; CCP Organization Department; China		For some developing countries, the international flow of their human talent in the recent decade was more of a "reverse brain gain" than a "brain drain." China, too, joined the group of states whose students, after studying abroad, now found sufficient opportunity and an acceptable quality of life back home to make returning after graduation a reasonable option. Still, China had not succeeded in …	[Zweig, David] Hong Kong Univ Sci & Technol, Div Social Sci, Hong Kong, Hong Kong, Peoples R China; [Wang, Huiyao] Ctr China & Globalizat, Beijing, Peoples R China	Zweig, D (corresponding author), Hong Kong Univ Sci & Technol, Div Social Sci, Hong Kong, Hong Kong, Peoples R China.	sozweig@ust.hk					Agunias D. R., 2007, CIRCULAR MIGRATION D; Borjas GJ, 1996, REV ECON STAT, V78, P165, DOI 10.2307/2109856; CAO C, 2004, CHINAS EFFORTS TURNI; Cao C., 2008, ASIAN POPULATION STU, V4, P331, DOI DOI 10.1080/17441730802496532; Castells M., 1996, RISE NETWORK SOC; CERASE FP, 1974, INT MIGR REV, V8, P245, DOI 10.2307/3002783; Chen Changgui, 1998, GAODENG JIAOYU YANJI, V77, P50; Co CY, 2000, J POPUL ECO…	30	60	62	6	68	CAMBRIDGE UNIV PRESS	NEW YORK	32 AVENUE OF THE AMERICAS, NEW YORK, NY 10013-2473 USA	0305-7410	1468-2648		CHINA QUART	China Q.	SEP	2013	5		215
J	Franzoni, C; Scellato, G; Stephan, P				Franzoni, Chiara; Scellato, Giuseppe; Stephan, Paula			The mover's advantage: The superior performance of migrant scientists	ECONOMICS LETTERS			English	Article						Foreign-born scientists; High-skilled migration; Scientist mobility; Brain drain; Migrant selection	BRAIN-DRAIN; FOREIGN-BORN; INNOVATION; IMMIGRATION; COUNTRIES; SCIENCE; VISA	Migrant scientists outperform domestic scientists. The result persists after instrumenting migration for reasons of work or study with migration in childhood to minimize the effect of selection. The results are consistent with theories of knowledge recombination and specialty matching. (C) 2013 Elsevier B.V. All rights reserved.	[Franzoni, Chiara] Politecn Milan, Sch Management, I-20133 Milan, Italy; [Scellato, Giuseppe] Politecn Torino, Dept Management & Prod Engn, Turin, Italy; [Scellato, Giuseppe] Coll Carlo Alberto, BRIC, Moncalieri Torino, Italy; [Stephan, Paula] Georgia State Univ, Andrew Young Sch Policy Studies, Atlanta, GA 30303 USA; [Stephan, Paula] NBER, Cambridge, MA 02138 USA; [Stephan, Paula] Univ Turin, De…	Franzoni, C (corresponding author), Politecn Milan, Sch Management, Piazza Leonardo da Vinci 32, I-20133 Milan, Italy.	chiara.franzoni@polimi.it	Franzoni, Chiara/AAH-3119-2019	Franzoni, Chiara/0000-0002-6092-0074; Scellato, Giuseppe/0000-0003-0927-9346			Agrawal A, 2011, J URBAN ECON, V69, P43, DOI 10.1016/j.jue.2010.06.003; Borjas G., 2012, 17800 NBER; BORJAS GJ, 1994, J ECON LIT, V32, P1667; Fleming L, 2001, MANAGE SCI, V47, P117, DOI 10.1287/mnsc.47.1.117.10671; Franzoni C, 2012, NAT BIOTECHNOL, V30, P1250, DOI 10.1038/nbt.2449; Franzoni C, 2011, SCIENCE, V333, P702, DOI 10.1126/science.1197286; Gaule P, 2013, REV ECON STAT, V95, P698, DOI 10.…	28	60	60	2	46	ELSEVIER SCIENCE SA	LAUSANNE	PO BOX 564, 1001 LAUSANNE, SWITZERLAND	0165-1765	1873-7374		ECON LETT	Econ. Lett.	JAN	2014	5	122	1
J	Laudel, G				Laudel, G			Migration currents among the scientific elite	MINERVA			English	Article							BRAIN-DRAIN; NATIONAL PERFORMANCES; PUBLICATION OUTPUT; CITATION IMPACT; WORLD SCIENCE; RESEARCHERS	Many countries today have policies to encourage outstanding scientists to remain, or return, 'home'. To date, the cumulative effect of these policies remains unclear. This essay argues that we need a new approach to studying elites in science. It draws upon three studies to suggest that migration is field-specific; that migration occurs more among potential, rather than among established elites; …	Australian Natl Univ, Res Sch Social Sci, Res Evaluat & Policy Project, Canberra, ACT 0200, Australia	Laudel, G (corresponding author), Australian Natl Univ, Res Sch Social Sci, Res Evaluat & Policy Project, Canberra, ACT 0200, Australia.	grit.laudel@anu.edu.au		Laudel, Grit/0000-0003-3186-0348			*AUSTR SOC MED RES, 1999, ASMR WORKPL SURV; *BMBF, 2001, BEIT BMBF FRAG OFF A, P7; Bosch X, 2003, LANCET, V361, P2210, DOI 10.1016/S0140-6736(03)13789-0; BRAUN T, 1994, SCIENTOMETRICS, V31, P3, DOI 10.1007/BF02018099; BRAUN T, 1994, SCIENTOMETRICS, V29, P299, DOI 10.1007/BF02033443; BUECHTEMANN CH., 2001, DTSCH NACHWUCHSWISSE, P19; CARLSON T, 1995, MINERVA, V33, P211, DOI 10.1007/BF01117501; CHUB…	36	59	61	0	14	SPRINGER	DORDRECHT	VAN GODEWIJCKSTRAAT 30, 3311 GZ DORDRECHT, NETHERLANDS	0026-4695	1573-1871		MINERVA	Minerva	DEC	2005	5	43	4
J	Zhang, LA; Ness, EC				Zhang, Liang; Ness, Erik C.			Does State Merit-Based Aid Stem Brain Drain?	EDUCATIONAL EVALUATION AND POLICY ANALYSIS			English	Article						higher education finance; student financial aid; student migration	FINANCIAL-AID; ENROLLMENT DEMAND; HOPE; EDUCATION; IMPACT; MIGRATION	In this study, the authors use college enrollment and migration data to test the brain drain hypothesis. Their results suggest that state merit scholarship programs do indeed stanch the migration of "best and brightest" students to other states. In the aggregate and on average, the implementation of state merit aid programs both increases the total 1st-year student enrollment in merit aid states …	[Ness, Erik C.] Univ Georgia, Inst Higher Educ, Athens, GA 30606 USA; [Zhang, Liang] Penn State Univ, Dept Educ Policy Studies, University Pk, PA 16802 USA	Ness, EC (corresponding author), Univ Georgia, Inst Higher Educ, 010 Meigs Hall, Athens, GA 30606 USA.	eness@uga.edu					BARYLA E. R., 2001, ED EC, V9, P269, DOI [10.1080/09645290110086135, DOI 10.1080/09645290110086135]; Berger MC, 2002, ECON EDUC REV, V21, P101, DOI 10.1016/S0272-7757(00)00065-0; Berry Willian, 2007, THEORIES POLICY PROC, P223; Bertrand M, 2004, Q J ECON, V119, P249, DOI 10.1162/003355304772839588; BETTS JR, 1995, J HUM RESOUR, V30, P741, DOI 10.2307/146230; BINDER M, 2004, STATE MERIT SCHOLARS, …	51	59	59	2	13	SAGE PUBLICATIONS INC	THOUSAND OAKS	2455 TELLER RD, THOUSAND OAKS, CA 91320 USA	0162-3737	1935-1062		EDUC EVAL POLICY AN	Educ. Eval. Policy Anal.	JUN	2010	5	32	2
J	Gibson, J; McKenzie, D				Gibson, John; McKenzie, David			The Economic Consequences of Brain Drain' of the Best and Brightest: Microeconomic Evidence from Five Countries	ECONOMIC JOURNAL			English	Article							MIGRATION; EDUCATION; PROFESSIONALS; PRODUCTIVITY; MIGRANTS; DURATION; NETWORKS; GROWTH; LABOR	This article presents results of innovative surveys that tracked academic high achievers from five countries to wherever they moved in the world to directly measure at the micro level the channels through which high-skilled emigration affects sending countries. There are high levels of emigration and of return and the income gains to the best and brightest from migrating are an order of magnitude…	[McKenzie, David] World Bank, Dev Res Grp, Washington, DC 20433 USA; Univ Waikato, Hamilton, New Zealand	McKenzie, D (corresponding author), World Bank, Dev Res Grp, MSN MC3-307,1818 H St NW, Washington, DC 20433 USA.	dmckenzie@worldbank.org	Gibson, John/AAM-6159-2020	Gibson, John/0000-0003-3886-6873			Acemoglu D, 2001, NBER MACROEC ANN-SER, V15, P9; Beegle K, 2011, REV ECON STAT, V93, P1010, DOI 10.1162/REST_a_00105; Beine M., 2008, 3398 IZA; Beine M, 2007, WORLD BANK ECON REV, V21, P249, DOI 10.1093/wber/lhm007; Ben-David Dan, 2007, 6338 CEPR; Bertrand M, 2010, AM ECON J-APPL ECON, V2, P228, DOI 10.1257/app.2.3.228; Bhagwati J., 2000, SOCIAL DIMENSIONS US, P87; Bhagwati J., 1974, J DEV ECON, …	66	59	60	0	28	OXFORD UNIV PRESS	OXFORD	GREAT CLARENDON ST, OXFORD OX2 6DP, ENGLAND	0013-0133	1468-0297		ECON J	Econ. J.	MAY	2012	5	122	560
J	Adsera, A; Pytlikova, M				Adsera, Alicia; Pytlikova, Mariola			The Role of Language in Shaping International Migration	ECONOMIC JOURNAL			English	Article							LABOR DIVERSITY; SELF-SELECTION; BRAIN-DRAIN; EARNINGS; ENGLISH; PROFICIENCY; IMMIGRATION; FLUENCY; MEXICO; SKILLS	This article examines the importance of language in international migration from multiple angles by studying the role of linguistic proximity, widely spoken languages, linguistic enclaves and language-based immigration policy requirements. To this aim we collect a unique data set on immigration flows and stocks in 30 OECD destinations from all world countries over the period 1980-2010 and constru…	[Adsera, Alicia] Princeton Univ, Princeton, NJ 08544 USA; [Pytlikova, Mariola] VSB Tech Univ Ostrava, Ostrava 70121, Czech Republic	Pytlikova, M (corresponding author), VSB Tech Univ Ostrava, Fac Econ, Sokolska Tr 33, Ostrava 70121, Czech Republic.	mariola.pytlikova@vsb.cz	Pytlikova, Mariola/I-5193-2018	Pytlikova, Mariola/0000-0002-0639-152X	NORFACE research programme on Migration in Europe-Social, Economic, Cultural and Policy Dynamics (MI3-Migration: Integration, Impact and Interaction); Danish Research CouncilDet Frie Forskningsrad (DFF) [09-075719, 0602-01553B]; Operational Programme Education for Competitiveness [CZ.1.07/2.3.00/20.0296]; Czech Science FoundationGrant Agency of the Czech Republic [GA15-23177S]; SGS Research grant…	We are grateful to our anonymous referees and the editor in charge, for useful comments and suggestions, to participants at NORFACE and CReAM conference on Migration: Economic Change, Social Challenge in London, EEA conference in Oslo, WISE Symposium on Contemporary Labor Economics in Xiamen, IZA AM2 2010 in Bonn, First Tempo Conference on International Migration in Dublin and NORFACE, WB and CRe…	Bakker Dik, 2009, LINGUIST TYPOL, V13, P169, DOI DOI 10.1515/LITY.2009.009; Bauer T, 2005, J POPUL ECON, V18, P649, DOI 10.1007/s00148-005-0009-z; Beine M, 2011, J DEV ECON, V95, P30, DOI 10.1016/j.jdeveco.2009.11.004; Belot M., 2012, SCANDINAVIAN J EC, V114, P681; Belot M, 2012, J POPUL ECON, V25, P1077, DOI 10.1007/s00148-011-0356-x; Bleakley H, 2004, REV ECON STAT, V86, P481, DOI 10.1162/00346…	59	59	60	1	56	OXFORD UNIV PRESS	OXFORD	GREAT CLARENDON ST, OXFORD OX2 6DP, ENGLAND	0013-0133	1468-0297		ECON J	Econ. J.	AUG	2015	6	125	586
J	Dychtwald, K; Erickson, T; Morison, B				Dychtwald, K; Erickson, T; Morison, B			It's time to retire retirement	HARVARD BUSINESS REVIEW			English	Article								Companies have been so focused on down-sizing to contain costs that they've largely neglected a looming threat to their competitiveness: a severe shortage of talented workers. The general population is aging and with it, the labor pool. People are living longer, healthier lives, and the birthrate is at a historical low. During the next 15 years, 80% of the native-born workforce growth in North Am…	Age Wave, Think Tank & Consulting Firm, San Francisco, CA USA	Dychtwald, K (corresponding author), Age Wave, Think Tank & Consulting Firm, San Francisco, CA USA.	kdychtwald@agewave.com; tjerickson@concoursgroup.com; rfmorison@concoursgroup.com						0	58	58	0	28	HARVARD BUSINESS SCHOOL PUBLISHING CORPORATION	WATERTOWN	300 NORTH BEACON STREET, WATERTOWN, MA 02472 USA	0017-8012			HARVARD BUS REV	Harv. Bus. Rev.	MAR	2004	4	82	3
J	Nguyen, L; Ropers, S; Nderitu, E; Zuyderduin, A; Luboga, S; Hagopian, A				Nguyen, Lisa; Ropers, Steven; Nderitu, Esther; Zuyderduin, Anneke; Luboga, Sam; Hagopian, Amy			Intent to migrate among nursing students in Uganda: Measures of the brain drain in the next generation of health professionals	HUMAN RESOURCES FOR HEALTH			English	Article							AFRICA; PHYSICIANS	Background: There is significant concern about the worldwide migration of nursing professionals from low-income countries to rich ones, as nurses are lured to fill the large number of vacancies in upper-income countries. This study explores the views of nursing students in Uganda to assess their views on practice options and their intentions to migrate. Methods: Anonymous questionnaires were dist…	[Nguyen, Lisa; Ropers, Steven] Univ Washington, Sch Med, Seattle, WA 98195 USA; [Nderitu, Esther] Aga Khan Univ, Sch Nursing, Dept Nursing, Kampala, Uganda; [Luboga, Sam] Makerere Univ, Dept Med, Kampala, Uganda; [Hagopian, Amy] Univ Washington, Sch Publ Hlth, Dept Hlth Serv, Seattle, WA 98195 USA	Nguyen, L (corresponding author), Univ Washington, Sch Med, Seattle, WA 98195 USA.	ltn2@u.washington.edu; sropers@u.washington.edu; esther.nderitu@aku.ac.ug; anneke.zuyderduin@gmail.com; sluboga@med.mak.ac.ug; hagopian@u.washington.edu					Aiken LH, 2004, HEALTH AFFAIR, V23, P69, DOI 10.1377/hlthaff.23.3.69; [Anonymous], 2005, SHORT LONG FORMS, P1; [Anonymous], 2006, LANCET, P367; Buchan J., 2005, GLOBAL NURSING REV I, P1; Buchan James, 2005, GLOBAL NURSING REV I; Chen L, 2004, LANCET, V364, P1984, DOI 10.1016/S0140-6736(04)17482-5; de Vries E, 2003, SAMJ S AFR MED J, V93, P789; Dovlo D, 2002, CONS M COLL HLTH PRO; Dussault Gilles,…	22	58	58	0	13	BMC	LONDON	CAMPUS, 4 CRINAN ST, LONDON N1 9XW, ENGLAND	1478-4491			HUM RESOUR HEALTH	Hum. Resour. Health	40940	2008	5	6
J	Clark, PF; Stewart, JB; Clark, DA				Clark, Paul F.; Stewart, James B.; Clark, Darlene A.			The globalization of the labour market for health-care professionals	INTERNATIONAL LABOUR REVIEW			English	Article							NURSES; MIGRATION	The worldwide shortage of health-care workers has led to a brain drain that is negatively affecting the health-care systems of less affluent countries. The authors study the factors encouraging nurses and doctors to migrate, measure the costs and benefits of such migration and analyse methods of foreign recruitment. They then look at the theories that help explain this phenomenon: human capital t…	Penn State Univ, Dept Labor Studies & Ind Relat, University Pk, PA 16802 USA; Penn State Univ, Sch Nursing, University Pk, PA 16802 USA	Clark, PF (corresponding author), Penn State Univ, Dept Labor Studies & Ind Relat, University Pk, PA 16802 USA.	pfc2@psu.edu; js8@psu.edu; dac128@psu.edu					*AFT, 2003, EMPT HALLW HIDD SHOR; Aiken LH, 2001, HEALTH AFFAIR, V20, P43, DOI 10.1377/hlthaff.20.3.43; ANDERSSON H, 2004, MALAWI CRIPPLED BY N; BROWN P, 2003, IMMUNIZATION FOC OCT, P6; Buchan J, 2004, B WORLD HEALTH ORGAN, V82, P587; BUCHAN J, 2004, LONDON CALLING INT R; Buchan J., 2004, INT RECRUITMENT HLTH; Buchan J., 2003, INT NURSE MOBILITY T; CARVEL J, 2004, GUARDIAN LONDON 0827; CHERRY B, …	58	57	58	0	18	WILEY	HOBOKEN	111 RIVER ST, HOBOKEN 07030-5774, NJ USA	0020-7780	1564-913X		INT LABOUR REV	Int. Labour Rev.		2006	5	145	43862
J	Haapanen, M; Tervo, H				Haapanen, Mika; Tervo, Hannu			MIGRATION OF THE HIGHLY EDUCATED: EVIDENCE FROM RESIDENCE SPELLS OF UNIVERSITY GRADUATES	JOURNAL OF REGIONAL SCIENCE			English	Article							FAMILY MIGRATION; UNITED-STATES; BRAIN-DRAIN; MOBILITY; UNEMPLOYMENT; MOVES; DECISIONS; BEHAVIOR; FINLAND; DETERMINANTS	We examine the inter-regional migration of university graduates from 1991 to 2003 in Finland. The results show that time matters: two-years before and during the graduation year the hazard rates of migration increase, and then decrease thereafter. Although university graduates are particularly mobile, we find that most of them do not move from their region of studies within 10 years after graduat…	[Haapanen, Mika; Tervo, Hannu] Univ Jyvaskyla, Sch Business & Econ, FI-40014 Jyvaskyla, Finland	Haapanen, M (corresponding author), Univ Jyvaskyla, Sch Business & Econ, POB 35, FI-40014 Jyvaskyla, Finland.	mika.p.haapanen@jyu.fi; hannu.t.tervo@jyu.fi	Haapanen, Mika/M-6646-2019	Haapanen, Mika/0000-0003-2964-3352; Tervo, Hannu/0000-0002-2979-994X			Andrews M, 2011, J R STAT SOC A STAT, V174, P127, DOI 10.1111/j.1467-985X.2010.00656.x; BAILEY AJ, 1993, ANN REGIONAL SCI, V27, P315, DOI 10.1007/BF01583571; Beine M, 2008, ECON J, V118, P631, DOI 10.1111/j.1468-0297.2008.02135.x; Busch O, 2010, ANN REGIONAL SCI, V44, P559, DOI 10.1007/s00168-008-0274-3; Cameron A.C., 2005, MICROECONOMETRICS ME; Christiadi, 2008, J REGIONAL SCI, V48, P893, DOI 10…	57	57	57	0	40	WILEY-BLACKWELL	HOBOKEN	111 RIVER ST, HOBOKEN 07030-5774, NJ USA	0022-4146			J REGIONAL SCI	J. Reg. Sci.	OCT	2012	5	52	4
J	Marchal, B; Kegels, G				Marchal, B; Kegels, G			Health workforce imbalances in times of globalization: brain drain or professional mobility?	INTERNATIONAL JOURNAL OF HEALTH PLANNING AND MANAGEMENT			English	Article; Proceedings Paper	Health Care for All Conference	OCT, 2001	ANTWERP, BELGIUM			brain drain; human resources; health policy; workforce balance; globalization	DOCTORS; UNHAPPY; MIND; GAP	The health workforce is of strategic importance to the performance of national health systems as well as of international disease control initiatives. The brain drain from rural to urban areas, and from developing to industrialized countries is a long-standing phenomenon in the health professions but has in recent years taken extreme proportions, particularly in Africa. Adopting the wider perspec…	Inst Trop Med, Dept Publ Hlth, B-2000 Antwerp, Belgium	Marchal, B (corresponding author), Inst Trop Med, Dept Publ Hlth, Nationalestr 155, B-2000 Antwerp, Belgium.	bmarchal@itg.be	Whitford, Linda M/C-2470-2009				ALBURO F, 2002, SKILLED LABOUR MIGRA, P1; [Anonymous], 2000, LANCET, V356, P177; [Anonymous], 2001, MID LC PROGR MIGR DE, P1; [Anonymous], 2002, OECD GUID TEST CHEM, P1; *BBC, 2001, BBC NEWS 0508; Berliner HS, 2002, JAMA-J AM MED ASSOC, V288, P2742, DOI 10.1001/jama.288.21.2742; Brugha R, 2002, LANCET, V359, P435, DOI 10.1016/S0140-6736(02)07607-9; Buchan J, 2000, Int Nurs Rev, V47, P199; Bundred…	53	56	57	1	25	WILEY	HOBOKEN	111 RIVER ST, HOBOKEN 07030-5774, NJ USA	0749-6753	1099-1751		INT J HEALTH PLAN M	Int. J. Health Plan. Manag.	OCT-DEC	2003	4	18			1
J	Balaz, V; Williams, AM; Kollar, D				Balaz, V; Williams, AM; Kollar, D			Temporary versus permanent youth brain drain: Economic implications	INTERNATIONAL MIGRATION			English	Article							INTERNATIONAL MIGRATION; POLICY	Existing high levels of temporary migration between Central and Eastern Europe and the European Union (EU) have highlighted a number of concerns relating to the eastern enlargement of the Union. While much of the debate has focused on the destinations, we use Slovakia as a case study to explore economic implications for the countries of origin of highly skilled migrants. First, the paper examines…	Slovak Acad Sci, Inst Forecasting, Bratislava, Slovakia; Univ Exeter, Dept Geog, Exeter EX4 4QJ, Devon, England; Slovak Acad Sci, Inst Geog, Bratislava, Slovakia	Balaz, V (corresponding author), Slovak Acad Sci, Inst Forecasting, Bratislava, Slovakia.		Balaz, Vladimir/R-9416-2016	Balaz, Vladimir/0000-0002-8132-3789			Appleyard R, 2001, INT MIGR, V39, P7, DOI 10.1111/1468-2435.00176; Barro R. J., 1995, EC GROWTH; BAUER T, 1999, ASSESSMENT POSSIBLE; Beatrice I. J. M., 2002, INT J TRAINING DEV, V6, P54, DOI DOI 10.1111/1468-2419.00150; Beck U, 2002, INDIVIDUALIZATION; Biao X, 2003, INT MIGR, V41, P21, DOI 10.1111/1468-2435.00240; Castles S, 1999, INT MIGR, V37, P5, DOI 10.1111/1468-2435.00064; COHEN D, 2001, 179…	56	56	56	2	21	WILEY	HOBOKEN	111 RIVER ST, HOBOKEN 07030-5774, NJ USA	0020-7985	1468-2435		INT MIGR	Int. Migr.		2004	4	42	4
J	Hunter, RS; Oswald, AJ; Charlton, BG				Hunter, Rosalind S.; Oswald, Andrew J.; Charlton, Bruce G.			The Elite Brain Drain	ECONOMIC JOURNAL			English	Article							MIGRATION; SCIENCE; JOURNALS; INDEX	We collect data on the movement and productivity of elite scientists. Their mobility is remarkable: nearly half of the world's most-cited physicists work outside their country of birth. We show they migrate systematically towards nations with large R & D spending. Our study cannot adjudicate on whether migration improves scientists' productivity, but we find that movers and stayers have identical…	[Hunter, Rosalind S.] Univ Warwick, Coventry CV4 7AL, W Midlands, England; Univ Newcastle, Callaghan, NSW 2308, Australia	Hunter, RS (corresponding author), Univ Warwick, Coventry CV4 7AL, W Midlands, England.				Economic and Social Research CouncilEconomic & Social Research Council (ESRC) [ES/D002877/1] Funding Source: Researchfish		[Anonymous], 2007, NATURE, V446, P231; Beine M, 2001, J DEV ECON, V64, P275, DOI 10.1016/S0304-3878(00)00133-4; Beine M, 2008, ECON J, V118, P631, DOI 10.1111/j.1468-0297.2008.02135.x; BEKHRADNIA G, 2005, 19 HEPI; Bhagwati J., 1974, J DEV ECON, V1, P19, DOI DOI 10.1016/0304-3878(74)90020-0; CARAYOL N, 2005, INF ECON POLICY, V18, P55; Charlton BG, 2007, MED HYPOTHESES, V68, P931, DOI 10.1016/j.meh…	55	55	56	1	29	OXFORD UNIV PRESS	OXFORD	GREAT CLARENDON ST, OXFORD OX2 6DP, ENGLAND	0013-0133	1468-0297		ECON J	Econ. J.	JUN	2009	5	119	538
J	Iredale, R				Iredale, R			The need to import skilled personnel: Factors favouring and hindering its international mobility	INTERNATIONAL MIGRATION			English	Article; Proceedings Paper	Technical Symposium on International Migration and Development	JUN 29-JUL 03, 1998	THE HAGUE, NETHERLANDS				HONG-KONG; LABOR MIGRATION	Skilled migration has become a major element of contemporary flows. It has developed in scale and variety since the 1930s and now takes many forms, including "brain drain", professional transients, skilled permanent migrants and business transfers. Nevertheless, the data are poor, inconsistent and usually not differentiated by sex. The importance of policies, both national and regional, to contro…	Univ Wollongong, Sch Geosci, Wollongong, NSW, Australia; Univ Wollongong, Int Business Res Inst, Wollongong, NSW, Australia	Iredale, R (corresponding author), Univ Wollongong, Sch Geosci, Wollongong, NSW, Australia.						APPLEYARD R, 1985, IUSSP SEM EM ISS INT; APPLEYARD R, 1991, INT MIGRATION CHALLE; *AS PAC EC COOP HU, 1995, P OV SKILLS SHORT WO; ASH M, 1996, FORCED MIGRATION SCI, P1; BAKER M, 1994, RATIONALE AUSTR SKIL; BATTISTELLA G, 1998, WORKSH CONT SE AS SI; BEAVERSTOCK J, 1992, 17 U LOUGHB DEP GEOG; BOHNING WR, 1977, INT MIGR C MEX 1977, V2; Borjas G.J., 1990, FRIENDS STRANGERS IM; *CIC, 1995, IMPR SEL SY…	46	54	58	1	22	INT ORGANIZATION MIGRATION	GENEVA 19	PO BOX 71, CH-1211 GENEVA 19, SWITZERLAND	0020-7985			INT MIGR	Int. Migr.		1999	4	37	1
J	Britz, JJ; Lor, PJ; Coetzee, IEM; Bester, BC				Britz, JJ; Lor, PJ; Coetzee, IEM; Bester, BC			Africa as a knowledge society: A reality check	INTERNATIONAL INFORMATION & LIBRARY REVIEW			English	Article							INFORMATION	This paper investigates the question of whether Africa is moving towards a knowledge society. An analysis is made of the current initiatives that are undertaken in Africa to put the continent on the road towards a knowledge society. The content of the paper is structured in the following manner. Firstly, we explain what a knowledge society means and based on this definition we describe the techno…	Univ Wisconsin, Sch Informat Studies, Madison, WI 53706 USA; Tshwane Univ Technol, Pretoria, South Africa; Univ Pretoria, IFLA, ZA-0002 Pretoria, South Africa; Univ Pretoria, Dept Informat Sci, ZA-0002 Pretoria, South Africa; Tshwane Univ Technol, Dept Educ Management, Pretoria, South Africa	Britz, JJ (corresponding author), Univ Wisconsin, Sch Informat Studies, Madison, WI 53706 USA.	britz@sois.uwm.edu					*AFR 1, 2002, AFR 1 WIR CONT 21 CE; *AGORA, 2005, AGORA ACC GLOB ONL R; *AISI, AFR INF SOC IN AISI; *AITECH, 2002, AFR TEXH C AITECH AI; *AJOL, 2005, AJOL AFR J ONL; *AKNF, 2001, AKNF WHAT WHY AKNF; *ALMA, 2005, AFR LANG MAT ARCH MU; [Anonymous], 2000, CAN AFR CLAIM 21 CEN; Aronson B, 2004, NEW ENGL J MED, V350, P966, DOI 10.1056/NEJMp048009; ARUNACHALAM S, 2003, INT INF LIBR REV, V35, P133, DOI …	78	54	56	0	8	ACADEMIC PRESS LTD- ELSEVIER SCIENCE LTD	LONDON	24-28 OVAL RD, LONDON NW1 7DX, ENGLAND	1057-2317			INT INF LIBR REV	Int. Inf. Libr. Rev.	MAR	2006	5	38	1
J	Docquier, F; Lodigiani, E				Docquier, Frederic; Lodigiani, Elisabetta			Skilled Migration and Business Networks	OPEN ECONOMIES REVIEW			English	Article						FDI; Migration; Brain drain; Network; Diaspora	HUMAN-CAPITAL FORMATION; BRAIN-DRAIN; PANEL-DATA; GROWTH; TRADE; IMPACT; LABOR	The role of migrants' networks in promoting cross border investments has been stressed in the literature, possibly making migration and FDI complements rather than substitutes in the long run. In this paper, we estimate the magnitude of such business network externalities in dynamic empirical models of FDI-funded capital accumulation. We use original data on capital and migration stocks rather th…	[Docquier, Frederic; Lodigiani, Elisabetta] Catholic Univ Louvain, IRES, Dept Econ, B-1348 Louvain, Belgium; [Docquier, Frederic] Natl Fund Sci Res, Wallonia, Belgium; [Lodigiani, Elisabetta] Univ Luxembourg, CREA, L-1511 Luxembourg, Luxembourg	Docquier, F (corresponding author), Catholic Univ Louvain, IRES, Dept Econ, 3 Pl Montesquieu, B-1348 Louvain, Belgium.	frederic.docquier@uclouvain.be		Lodigiani, Elisabetta/0000-0003-0638-5215			ANDERSON TW, 1982, J ECONOMETRICS, V18, P47, DOI 10.1016/0304-4076(82)90095-1; ARELLANO M, 1991, REV ECON STUD, V58, P277, DOI 10.2307/2297968; ARELLANO M, 1995, J ECONOMETRICS, V68, P29, DOI 10.1016/0304-4076(94)01642-D; AROCA P, 2004, MIGRATION TRADE FDI; Arora A., 2004, INNOVATION POLICY EC, V5; Barba Navaretti G., 2004, MULTINATIONAL FIRMS; Barro RJ, 2001, OXFORD ECON PAP, V53, P541, DOI 10.1…	37	54	56	0	21	SPRINGER	DORDRECHT	VAN GODEWIJCKSTRAAT 30, 3311 GZ DORDRECHT, NETHERLANDS	0923-7992	1573-708X		OPEN ECON REV	Open Econ. Rev.	SEP	2010	5	21	4
J	Jonkers, K; Cruz-Castro, L				Jonkers, Koen; Cruz-Castro, Laura			Research upon return: The effect of international mobility on scientific ties, production and impact	RESEARCH POLICY			English	Article						Argentina; Return migration; Scientific mobility; Research collaboration; Research productivity	HUMAN-CAPITAL FORMATION; BRAIN-DRAIN; RESEARCH COLLABORATION; SCIENCE; KNOWLEDGE; PATTERNS; GLOBALIZATION; CIRCULATION; COMMUNITIES; GENDER	Highly skilled return migrants contribute to the establishment of ties between the home and host systems. This paper studies how the professional ties, which Argentinean researchers built up during the time spent in foreign research systems, influence their collaboration patterns and their research outputs upon return. It confirms the expectation that having foreign work experience helps to expla…	[Jonkers, Koen; Cruz-Castro, Laura] CSIC Inst Publ Goods & Policies IPP, Madrid 28037, Spain	Jonkers, K (corresponding author), CSIC Inst Publ Goods & Policies IPP, Calle Albasanz 26-28,3 D, Madrid 28037, Spain.	koen.jonkers@csic.es		Cruz-Castro, Laura/0000-0002-9786-6251			Ackers L, 2005, INT MIGR, V43, P99, DOI 10.1111/j.1468-2435.2005.00343.x; Agrawal A, 2006, J ECON GEOGR, V6, P571, DOI 10.1093/jeg/lbl016; Agrawal A, 2011, J URBAN ECON, V69, P43, DOI 10.1016/j.jue.2010.06.003; ALLISON PD, 1974, AM SOCIOL REV, V39, P596, DOI 10.2307/2094424; ALLISON PD, 1980, SOC STUD SCI, V10, P163, DOI 10.1177/030631278001000203; Beine M, 2008, ECON J, V118, P631, DOI 10.1111/j…	73	54	57	3	85	ELSEVIER	AMSTERDAM	RADARWEG 29, 1043 NX AMSTERDAM, NETHERLANDS	0048-7333	1873-7625		RES POLICY	Res. Policy	SEP	2013	5	42	8
J	Laudel, G				Laudel, G			Study the brain drain: Can bibliometric methods help?	SCIENTOMETRICS			English	Article; Proceedings Paper	7th International Conference on Science and Technology Indicators	SEP 25-28, 2002	KARLSRUHE, GERMANY				GEOGRAPHIC-MOBILITY; SCIENTISTS; SCIENCE	Today science policy makers in many countries worry about a brain drain, i.e., about permanently losing their best scientists to other countries. However, such a brain drain has proven to be difficult to measure. This article reports a test of bibliometric methods that could possibly be used to study the brain drain on the micro-level. An investigation of elite mobility must solve the three metho…	Australian Natl Univ, Res Eval & Pol Project, Res Sch Social Sci, Canberra, ACT 0200, Australia	Laudel, G (corresponding author), Australian Natl Univ, Res Eval & Pol Project, Res Sch Social Sci, Canberra, ACT 0200, Australia.	grit.laudel@anu.edu.au		Laudel, Grit/0000-0003-3186-0348			Aksnes DW, 2000, SCIENTOMETRICS, V49, P7, DOI 10.1023/A:1005653006993; ALLISON PD, 1987, AM SOCIOL REV, V52, P643, DOI 10.2307/2095600; AMICK DJ, 1974, SCI STUD, V4, P1, DOI 10.1177/030631277400400101; *AUSTR RES COUNC, 2001, DISCOVERY DEC, P1; *BMBF, 2001, BEITR BMBF ZUM FRAG; BUECHTEMANN CF, 2001, DTSCH NACHWUCHSWISSE; CRAWFORD S, 1971, J AM SOC INFORM SCI, V22, P301, DOI 10.1002/asi.4630220502…	39	53	54	1	28	SPRINGER	DORDRECHT	VAN GODEWIJCKSTRAAT 30, 3311 GZ DORDRECHT, NETHERLANDS	0138-9130	1588-2861		SCIENTOMETRICS	Scientometrics		2003	4	57	2
J	Toole, AA; Czarnitzki, D				Toole, Andrew A.; Czarnitzki, Dirk			Commercializing Science: Is There a University "Brain Drain" from Academic Entrepreneurship?	MANAGEMENT SCIENCE			English	Article						academic entrepreneurship; SBIR; NIH; brain drain; research productivity; university mission	RESEARCH PRODUCTIVITY; LIFE-CYCLE; FIRM PERFORMANCE; KNOWLEDGE; BIOTECHNOLOGY; SCIENTISTS; STRATEGIES; INNOVATION; ECONOMICS; INVENTION	When academic researchers participate in commercialization using for-profit firms, there is a potentially costly trade-off-their time and effort are diverted away from academic knowledge production. This is a form of brain drain on the not-for-profit research sector that may reduce knowledge accumulation and adversely impact long-run economic growth. In this paper, we examine the economic signifi…	[Toole, Andrew A.] Rutgers State Univ, Dept Agr Food & Resource Econ, New Brunswick, NJ 08901 USA; [Toole, Andrew A.; Czarnitzki, Dirk] Ctr European Econ Res, D-68161 Mannheim, Germany; [Czarnitzki, Dirk] Katholieke Univ Leuven, Dept Managerial Econ Strategy & Innovat, B-3000 Louvain, Belgium; [Czarnitzki, Dirk] Katholieke Univ Leuven, Ctr R&D Monitoring, B-3000 Louvain, Belgium	Toole, AA (corresponding author), Rutgers State Univ, Dept Agr Food & Resource Econ, New Brunswick, NJ 08901 USA.	toole@aesop.rutgers.edu; dirk.czarnitzki@econ.kuleuven.be			National Bureau of Economic Research, Innovation Policy and the Economy Group	This research was supported by a grant from the National Bureau of Economic Research, Innovation Policy and the Economy Group. All analysis and interpretation reflect the views of the authors, and they are responsible for any errors. The authors thank Bronwyn Hall, Richard Jensen, Georg Licht, Paula Stephan, Otto Toivanen, and seminar participants for comments on an earlier draft of this paper. T…	ADAMS JD, 1990, J POLIT ECON, V98, P673, DOI 10.1086/261702; Agrawal A, 2006, STRATEGIC MANAGE J, V27, P63, DOI 10.1002/smj.508; Agrawal A, 2002, MANAGE SCI, V48, P44, DOI 10.1287/mnsc.48.1.44.14279; [Anonymous], 2009, ASS SBIR PROGR NAT I; Audretsch DB, 1999, J EVOL ECON, V9, P97, DOI 10.1007/s001910050076; *AUTM, 2005, AUTM US LIC SURV FY; Azoulay P, 2006, RES POLICY, V35, P970, DOI 10.1016/j.r…	50	53	53	3	92	INFORMS	CATONSVILLE	5521 RESEARCH PARK DR, SUITE 200, CATONSVILLE, MD 21228 USA	0025-1909	1526-5501		MANAGE SCI	Manage. Sci.	SEP	2010	5	56	9
J	Lilleor, HB; Van den Broeck, K				Lilleor, Helene Bie; Van den Broeck, Katleen			Economic drivers of migration and climate change in LDCs	GLOBAL ENVIRONMENTAL CHANGE-HUMAN AND POLICY DIMENSIONS			English	Article						Migration; Economic drivers; Climate change; Climate variability; LDCs	OUT-MIGRATION; BRAIN-DRAIN; REMITTANCES; RAINFALL; CONSUMPTION; INSURANCE; COUNTRIES; RESPONSES; AFRICA; SHOCKS	Environmental migration is a topic which has given rise to widespread debate and gloomy predictions about the state of the world in 2050, but where rigorous research and empirical evidence are unfortunately in short supply. In this paper, we review the existing research on and empirical evidence of how climate change and climate variability in Less Developed Countries (LDCs) affects two main driv…	[Lilleor, Helene Bie] Rockwool Fdn, Res Unit, DK-7307 Copenhagen K, Denmark	Lilleor, HB (corresponding author), Rockwool Fdn, Res Unit, Solvgade 10,2Tv, DK-7307 Copenhagen K, Denmark.	hbl@rff.dk					Ahmed SA, 2011, GLOBAL ENVIRON CHANG, V21, P46, DOI 10.1016/j.gloenvcha.2010.10.003; Barrios S, 2006, J URBAN ECON, V60, P357, DOI 10.1016/j.jue.2006.04.005; Barrios S, 2010, REV ECON STAT, V92, P350, DOI 10.1162/rest.2010.11212; Beegle K, 2011, REV ECON STAT, V93, P1010, DOI 10.1162/REST_a_00105; Beine M, 2008, ECON J, V118, P631, DOI 10.1111/j.1468-0297.2008.02135.x; Bertoli Simone, 2010, 4957 …	81	52	52	0	46	ELSEVIER SCI LTD	OXFORD	THE BOULEVARD, LANGFORD LANE, KIDLINGTON, OXFORD OX5 1GB, OXON, ENGLAND	0959-3780	1872-9495		GLOBAL ENVIRON CHANG	Glob. Environ. Change-Human Policy Dimens.	DEC	2011	5	21			1
J	Baruffaldi, SH; Landoni, P				Baruffaldi, Stefano H.; Landoni, Paolo			Return mobility and scientific productivity of researchers working abroad: The role of home country linkages	RESEARCH POLICY			English	Article						Mobility; Brain drain; Home country linkages; Migration	BRAIN-DRAIN; INTERNATIONAL MIGRATION; RESEARCH COLLABORATION; FOREIGN-BORN; KNOWLEDGE; CIRCULATION; NETWORKS; COMMUNITIES; TEMPORARY; SCIENCE	Through an analysis of 497 foreign researchers in Italy and Portugal we verify the impact of home linkages on return mobility choices and scientific productivity. We consider the presence of several different types of linkages of the researchers working abroad with their country of origin and control for the most relevant contextual factors (age, research area, position in the host country, etc.)…	[Baruffaldi, Stefano H.] Ecole Polytech Fed Lausanne CEMI, Lausanne, Switzerland; [Landoni, Paolo] Politecn Milan, Dept Management Econ & Ind Engn, Milan, Italy	Baruffaldi, SH (corresponding author), Ecole Polytech Fed Lausanne, CDM MTEI GE, ODY Odyssea 4 16, Stn 5, CH-1015 Lausanne, Switzerland.	stefano.baruffaldi@epfl.ch	Landoni, Paolo/D-1068-2018	Landoni, Paolo/0000-0001-5079-1101; Baruffaldi, Stefano/0000-0003-4022-7691			Ackers L, 2005, INT MIGR, V43, P99, DOI 10.1111/j.1468-2435.2005.00343.x; Ackers L, 2008, MINERVA, V46, P411, DOI 10.1007/s11024-008-9110-2; Agrawal A, 2008, J URBAN ECON, V64, P258, DOI 10.1016/j.jue.2008.01.003; Auriol L, 2007, SCI TECHNOLOGY INNOV; Auriol L., 2010, OECD SCI TECHNOLOGY; Avveduto S., 2004, STUDI EMIGRAZIONE, VXLI, P797; Balaz V, 2004, INT MIGR, V42, P3, DOI 10.1111/j.0020-7985.2…	71	52	54	3	63	ELSEVIER	AMSTERDAM	RADARWEG 29, 1043 NX AMSTERDAM, NETHERLANDS	0048-7333	1873-7625		RES POLICY	Res. Policy	NOV	2012	5	41	9
J	Dos Santos, MD; Postel-Vinay, F				Dos Santos, MD; Postel-Vinay, F			Migration as a source of growth: The perspective of a developing country	JOURNAL OF POPULATION ECONOMICS			English	Article						migration; temporary migration; growth; convergence	BRAIN-DRAIN; ECONOMIC-GROWTH; INCOME	This paper analyses the dynamics of migratory flows and growth in a developing economy. We show that when workers freely choose their location, some natives can rationally decide to return to their home country after they have accumulated a certain amount of knowledge abroad, while some prefer to stay permanently in the same economy (either at home or abroad). We point out that worker mobility ca…	Univ Evry Val Essonne, EPEE, CREST, INSEE, F-91025 Evry, France; Ecole Normale Super, INRA, LEA, F-75014 Paris, France	Dos Santos, MD (corresponding author), Univ Evry Val Essonne, EPEE, CREST, INSEE, 4 Blvd Francois Mitterrand, F-91025 Evry, France.						Barrett Alan, 2000, 135 IZA; Barro R. J., 1995, EC GROWTH; BAUMOL WJ, 1982, J PUBLIC ECON, V18, P343, DOI 10.1016/0047-2727(82)90036-6; Beine M, 2001, J DEV ECON, V64, P275, DOI 10.1016/S0304-3878(00)00133-4; Bhagwati J., 1974, J DEV ECON, V1, P19, DOI DOI 10.1016/0304-3878(74)90020-0; BHAGWATI JN, 1982, J PUBLIC ECON, V18, P291, DOI 10.1016/0047-2727(82)90034-2; BLITZ RC, 1977, KYKLOS, V30, P479…	32	51	51	0	10	SPRINGER-VERLAG	NEW YORK	175 FIFTH AVE, NEW YORK, NY 10010 USA	0933-1433			J POPUL ECON	J. Popul. Econ.	FEB	2003	4	16	1
J	Diallo, K				Diallo, K			Data on the migration of health-care workers: sources, uses, and challenges	BULLETIN OF THE WORLD HEALTH ORGANIZATION			English	Article						health manpower/statistics; brain drain/statistics; emigration and immigration/statistics; data collection/standards; statistics/standards; data interpretation; statistical; developing countries; developed countries		The migration of health workers within and-between countries is a growing concern worldwide because of its impact on health systems in developing and developed countries alike. Policy decisions need to be made at the national, regional and international levels,to manage more effectively this phenomenon, but those decisions will be effective and correctly implemented and evaluated Most statistics …	WHO, CH-1211 Geneva 27, Switzerland	Diallo, K (corresponding author), WHO, CH-1211 Geneva 27, Switzerland.	diallok@who.int					Bilsborrow R., 1997, INT MIGRATION STAT G; Buchan J., 2003, INT NURSE MOBILITY T; *BUR STAT, ISCO88; Diallo K, 2003, HUM RESOUR HEALTH, V1, P3, DOI DOI 10.1186/1478-4491-1-3; *ECLAC, 2003, EM NURS CAR CAUS CON; GALIN P, 2000, RELACIONES LAB SECTO, P19; GOLDFARB R, 1984, J DEV ECON, V15, P1, DOI 10.1016/0304-3878(84)90002-6; GUPTA N, 2003, HUMAN RESOURCES HLTH, V1, P5, DOI DOI 10.1186/1478-4491-1-…	16	51	51	0	10	WORLD HEALTH ORGANIZATION	GENEVA 27	MARKETING AND DISSEMINATION, CH-1211 GENEVA 27, SWITZERLAND	0042-9686			B WORLD HEALTH ORGAN	Bull. World Health Organ.	AUG	2004	4	82	8
J	Liu-Farrer, G				Liu-Farrer, Gracia			Educationally Channeled International Labor Mobility: Contemporary Student Migration from China to Japan	INTERNATIONAL MIGRATION REVIEW			English	Article							BRAIN-DRAIN; IMMIGRATION; AUSTRALIA; MANPOWER; LDCS	International education is an important channel of labor migration. Most commonly, this form of labor migration is considered as "brain drain," represented by the retention of graduate students in science and engineering in the host labor market. This case study of contemporary Chinese student migration to Japan shows that international students have different credentials, interests, and motivati…	Ochanomizu Univ, Tokyo, Japan	Liu-Farrer, G (corresponding author), Ochanomizu Univ, Tokyo, Japan.						Adams W, 1968, BRAIN DRAIN; AGARWAL VB, 1984, SOUTHERN ECON J, V50, P814, DOI 10.2307/1057995; ATAL Y, 1987, MIGRATION TALENT CAU; BELSON K, 2004, NY TIMES 0217; BHAGWATI JN, 1975, J DEV ECON, V2, P195, DOI DOI 10.1016/0304-3878(75)90002-4; BLOMQVIST AG, 1986, INT ECON REV, V27, P165, DOI 10.2307/2526613; CHEN TJ, 1995, WELTWIRTSCH ARCH, V131, P526, DOI 10.1007/BF02707916; Chin K. L., 1999, SMUGG…	64	51	51	0	40	WILEY-BLACKWELL PUBLISHING, INC	MALDEN	COMMERCE PLACE, 350 MAIN ST, MALDEN 02148, MA USA	0197-9183			INT MIGR REV	Int. Migr. Rev.	SPR	2009	5	43	1
J	Trippl, M				Trippl, Michaela			Scientific Mobility and Knowledge Transfer at the Interregional and Intraregional Level	REGIONAL STUDIES			English	Article						Star scientists; Scientific mobility; Interregional and intraregional knowledge transfer	INTERNATIONAL LABOR MOBILITY; BRAIN-DRAIN; MIGRATION; BIOTECHNOLOGY; UNIVERSITIES; CIRCULATION; PERFORMANCE; COMMUNITIES; SPILLOVERS; INNOVATION	Trippl M. Scientific mobility and knowledge transfer at the interregional and intraregional level, Regional Studies. The aim of this paper is to explore the extent and nature of knowledge flows which result from the international mobility of elite scientists. Based on the findings from a worldwide survey of star scientists' (that is, authors of highly cited journal articles in different research …	Vienna Univ Econ & Business, Inst Reg Dev & Environm, A-1090 Vienna, Austria	Trippl, M (corresponding author), Vienna Univ Econ & Business, Inst Reg Dev & Environm, Nordbergstr 15, A-1090 Vienna, Austria.	michaela.trippl@wu.ac.at					ACKERS L., 2005, INNOVATION EUROPEAN, V18, P301, DOI DOI 10.1080/13511610500186680; Agrawal A, 2006, J ECON GEOGR, V6, P571, DOI 10.1093/jeg/lbl016; Arrow K, 1959, EC WELFARE ALLOCATIO; Baba Y, 2009, RES POLICY, V38, P756, DOI 10.1016/j.respol.2009.01.006; Bryony G., 2005, INNOVATION EUROPEAN, V18, P277, DOI DOI 10.1080/13511610500186649; Doring T, 2006, REG STUD, V40, P375, DOI 10.1080/003434006…	37	51	55	3	63	ROUTLEDGE JOURNALS, TAYLOR & FRANCIS LTD	ABINGDON	4 PARK SQUARE, MILTON PARK, ABINGDON OX14 4RN, OXFORDSHIRE, ENGLAND	0034-3404	1360-0591		REG STUD	Reg. Stud.	37196	2013	5	47	10
J	JOHNSON, HG				JOHNSON, HG			THE ECONOMICS OF THE BRAIN-DRAIN - THE CANADIAN CASE	MINERVA			English	Article																*EC COUNC CAN, 1964, 1ST ANN REV EC GOALS, P166; 1963, MINERVA, V1, P342; 1963, EMIGRATION SCI UK RE; 1963, EMIGRATION SCI UK, P13	4	49	50	3	8	KLUWER ACADEMIC PUBL	DORDRECHT	SPUIBOULEVARD 50, PO BOX 17, 3300 AA DORDRECHT, NETHERLANDS	0026-4695			MINERVA	Minerva		1965	1	3	3
J	Kangasniemi, M; Winters, LA; Commander, S				Kangasniemi, Marl; Winters, L. Alan; Commander, Simon			Is the medical brain drain beneficial? Evidence from overseas doctors in the UK	SOCIAL SCIENCE & MEDICINE			English	Article						UK; migration; brain drain; international labour market; doctors	GROWTH	The 'beneficial brain drain' hypothesis suggests that skilled migration can be good for a sending country because the incentives it creates for obtaining training increase that country's net supply of skilled labour. Necessary conditions for this hypothesis to work are that the possibility of migration significantly affects decisions to take medical training and that migrants are not strongly scr…	Natl Inst Econ & Social Res, London, England; London Business Sch, Ctr New & Emerging Markets, London, England; Univ Sussex, Brighton BN1 9RH, E Sussex, England; World Bank, Washington, DC 20433 USA	Kangasniemi, M (corresponding author), Natl Inst Econ & Social Res, London, England.	mkangasniemi@niesr.ac.uk; lwinters@worldbank.org; scommander@london.edu			Economic and Social Research CouncilEconomic & Social Research Council (ESRC) [RES-107-28-1001] Funding Source: Researchfish		Astor A, 2005, SOC SCI MED, V61, P2492, DOI 10.1016/j.socscimed.2005.05.003; Beine M, 2001, J DEV ECON, V64, P275, DOI 10.1016/S0304-3878(00)00133-4; Beine M., 2003, 819 IZA; *BMA INT DEP, 2006, GUID DOCT NEW UK; COMMANDER S, 2004, CHALLENGES GLOBALIZA, pCH7; Constable Joanne, 2002, BMJ, V325, pS153, DOI 10.1136/bmj.325.7373.S153a; DAVIS M, 2000, UNPUB PROSPECTIVE CO; DOCQUIER F, 2006, CAGLAR OZD…	17	49	49	0	9	PERGAMON-ELSEVIER SCIENCE LTD	OXFORD	THE BOULEVARD, LANGFORD LANE, KIDLINGTON, OXFORD OX5 1GB, ENGLAND	0277-9536			SOC SCI MED	Soc. Sci. Med.	SEP	2007	5	65	5
J	Sherr, K; Mussa, A; Chilundo, B; Gimbel, S; Pfeiffer, J; Hagopian, A; Gloyd, S				Sherr, Kenneth; Mussa, Antonio; Chilundo, Baltazar; Gimbel, Sarah; Pfeiffer, James; Hagopian, Amy; Gloyd, Stephen			Brain Drain and Health Workforce Distortions in Mozambique	PLOS ONE			English	Article							EXTERNAL RESOURCES; SYSTEMS; AFRICA; ORGANIZATIONS; ACHIEVE; DOCTORS; ACCESS; SECTOR	Introduction: Trained human resources are fundamental for well-functioning health systems, and the lack of health workers undermines public sector capacity to meet population health needs. While external brain drain from low and middle-income countries is well described, there is little understanding of the degree of internal brain drain, and how increases in health sector funding through global …	[Sherr, Kenneth; Gimbel, Sarah; Pfeiffer, James; Hagopian, Amy; Gloyd, Stephen] Univ Washington, Dept Global Hlth, Seattle, WA 98195 USA; [Mussa, Antonio] Mozambique Minist Hlth, Human Resources Dept, Maputo, Mozambique; [Chilundo, Baltazar] Eduardo Mondlane Univ, Maputo, Mozambique	Sherr, K (corresponding author), Univ Washington, Dept Global Hlth, Seattle, WA 98195 USA.	ksherr@u.washington.edu			Doris Duke Charitable Foundation's Operations Research for AIDS Care and Treatment in Africa initiative (ORACTA)Doris Duke Charitable Foundation (DDCF) [2005053]; Doris Duke Charitable Foundation's African Health Initiative (AHI). [2009059]; Ministry of Health of Mozambique, Eduardo Mondlane University School of Medicine; Doris Duke Charitable FoundationDoris Duke Charitable Foundation (DDCF)	Support for this research was provided from the Doris Duke Charitable Foundation's Operations Research for AIDS Care and Treatment in Africa (ORACTA grant 2005053) initiative and by a Population Health and Implementation Training grant (2009059) through Doris Duke Charitable Foundation's African Health Initiative (AHI). The funders had no role in study design, data collection and analysis, decisi…	Buse K, 1997, SOC SCI MED, V45, P449, DOI 10.1016/S0277-9536(96)00365-6; Chen L, 2004, LANCET, V364, P1984, DOI 10.1016/S0140-6736(04)17482-5; Clemens MA, 2008, HUM RESOUR HEALTH, V6, DOI 10.1186/1478-4491-6-1; Crisp N, 2008, LANCET, V371, P689, DOI 10.1016/S0140-6736(08)60309-8; Dambisya YM, 2004, BMJ-BRIT MED J, V329, P600, DOI 10.1136/bmj.38134.524387.AE; Davey G, 2006, LANCET, V367, P629, DOI…	33	49	49	0	17	PUBLIC LIBRARY SCIENCE	SAN FRANCISCO	1160 BATTERY STREET, STE 100, SAN FRANCISCO, CA 94111 USA	1932-6203			PLOS ONE	PLoS One	APR 27	2012	5	7	4
J	Zhou, XD; Li, L; Hesketh, T				Zhou, Xu Dong; Li, Lu; Hesketh, Therese			Health system reform in rural China: Voices of healthworkers and service-users	SOCIAL SCIENCE & MEDICINE			English	Article						Health reforms; Primary care; Health insurance; Essential drugs; Qualitative; China	CARE REFORM; INSURANCE; POLICY; COVERAGE; PROVINCE; MARKET; LIST; ASIA	Like many other countries China is undergoing major health system reforms, with the aim of providing universal health coverage, and addressing problems of low efficiency and inequity. The first phase of the reforms has focused on strengthening primary care and improving health insurance coverage and benefits. The aim of the study was to explore the impacts of these reforms on healthworkers and se…	[Zhou, Xu Dong; Li, Lu] Zhejiang Univ, Sch Publ Hlth, Hangzhou 310012, Zhejiang, Peoples R China; [Hesketh, Therese] UCL Inst Global Hlth, London WC1N 1EH, England	Hesketh, T (corresponding author), UCL Inst Global Hlth, 30 Guilford St, London WC1N 1EH, England.	t.hesketh@ucl.ac.uk		zhou, xudong/0000-0002-0784-5343	UK Department for International Development [GTF130]	This study was funded through a grant from the UK Department for International Development (Grant number GTF130).	Bonias D, 2012, AUST HEALTH REV, V36, P378, DOI 10.1071/AH11095; Chen Z, 2009, LANCET, V373, P1322, DOI 10.1016/S0140-6736(09)60753-4; Cheng TM, 2008, HEALTH AFFAIR, V27, P1103, DOI 10.1377/hlthaff.27.4.1103; Colombo C, 2012, INTERN EMERG MED, V7, P183, DOI 10.1007/s11739-012-0757-1; Ekman B, 2008, HEALTH POLICY PLANN, V23, P252, DOI 10.1093/heapol/czn009; Gakidou E, 2006, LANCET, V368, P1920, DO…	29	49	49	1	53	PERGAMON-ELSEVIER SCIENCE LTD	OXFORD	THE BOULEVARD, LANGFORD LANE, KIDLINGTON, OXFORD OX5 1GB, ENGLAND	0277-9536			SOC SCI MED	Soc. Sci. Med.	SEP	2014	5	117
J	Scellato, G; Franzoni, C; Stephan, P				Scellato, Giuseppe; Franzoni, Chiara; Stephan, Paula			Migrant scientists and international networks	RESEARCH POLICY			English	Article						International mobility of researchers; Research collaboration; Survey data	BRAIN-DRAIN; MOBILITY; COLLABORATION; TECHNOLOGY; KNOWLEDGE; IMPACT; TEAMS; CIRCULATION; COMMUNITIES	We examine collaboration patterns of foreign scientists working in one of 16 countries in 2011 and compare them to the collaboration patterns of nonmigrant scientists and scientists with some international experience who have returned. Data come from the GlobSci survey. Major findings are that both foreign-born scientists and returnees have larger international research networks than do native re…	[Scellato, Giuseppe] Politecn Torino, Dept Management & Prod Engn, I-10129 Turin, Italy; [Scellato, Giuseppe] Coll Carlo Alberto, Bur Res Innovat Complex & Knowledge, I-10024 Moncalieri, Italy; [Franzoni, Chiara] Politecn Milan, Sch Management, I-20133 Milan, Italy; [Stephan, Paula] Georgia State Univ, Andrew Young Sch Policy Studies, Atlanta, GA 30302 USA; [Stephan, Paula] Natl Bur Econ Res, Cam…	Scellato, G (corresponding author), Politecn Torino, Dept Management & Prod Engn, I-10129 Turin, Italy.	giuseppe.scellato@polito.it	Franzoni, Chiara/AAH-3119-2019	Franzoni, Chiara/0000-0002-6092-0074; Scellato, Giuseppe/0000-0003-0927-9346			Ackers L, 2008, MOVING PEOPLE AND KNOWLEDGE: SCIENTIFIC MOBILITY IN AN ENLARGING EUROPEAN UNION, P1; Adams JD, 2005, RES POLICY, V34, P259, DOI 10.1016/j.respol.2005.01.014; Agrawal A, 2006, J ECON GEOGR, V6, P571, DOI 10.1093/jeg/lbl016; Agrawal A, 2011, J URBAN ECON, V69, P43, DOI 10.1016/j.jue.2010.06.003; Almeida P, 1999, MANAGE SCI, V45, P905, DOI 10.1287/mnsc.45.7.905; Ates G., 2013, EUROPE…	42	49	50	1	69	ELSEVIER SCIENCE BV	AMSTERDAM	PO BOX 211, 1000 AE AMSTERDAM, NETHERLANDS	0048-7333	1873-7625		RES POLICY	Res. Policy	FEB	2015	6	44	1
J	Wong, KY; Yip, CK				Wong, KY; Yip, CK			Education, economic growth, and brain drain	JOURNAL OF ECONOMIC DYNAMICS & CONTROL			English	Article						education; brain drain; economic growth; international labor migration	INTERNATIONAL MIGRATION	This paper constructs a two-sector overlapping-generations model of endogenous growth to study the effects of brain drain on growth, education and income distribution. It is shown that brain drain reduces the economic growth rate and generally hurts the non-emigrants through the static income-distributional effects and the dynamic damage on economic growth and human capital accumulation. If the i…	Univ Washington, Dept Econ, Seattle, WA 98195 USA; Chinese Univ Hong Kong, Dept Econ, Shatin, NT, Peoples R China	Wong, KY (corresponding author), Univ Washington, Dept Econ, Seattle, WA 98195 USA.	karyiu@u.washington.edu	YIP, Chong/AAU-7049-2020				BERRY RA, 1969, J POLIT ECON, V77, P778, DOI 10.1086/259562; Bhagwati Jagdish N., 1976, BRAIN DRAIN TAXATION, V2; BLOMQVIST AG, 1986, INT ECON REV, V27, P165, DOI 10.2307/2526613; FINDLAY R, 1981, EQUITY HUMAN CAPITAL, V2, P57; GALOR O, 1994, MIGRATION: A CHALLENGE FOR EUROPE, P59; GRUBEL HB, 1966, AM ECON REV, V56, P268; LUCAS RE, 1988, J MONETARY ECON, V22, P3, DOI 10.1016/0304-3932(88)90168-7;…	13	48	51	0	21	ELSEVIER	AMSTERDAM	RADARWEG 29, 1043 NX AMSTERDAM, NETHERLANDS	0165-1889	1879-1743		J ECON DYN CONTROL	J. Econ. Dyn. Control	APR	1999	4	23	43987
J	PORTES, A				PORTES, A			DETERMINANTS OF BRAIN-DRAIN	INTERNATIONAL MIGRATION REVIEW			English	Article									DUKE UNIV,DEPT SOCIOL,DURHAM,NC 27706							Dos Santos T, 1970, AM ECON REV, V60; DUBLIN TD, 1972, NEW ENGL J MED, V286, P870, DOI 10.1056/NEJM197204202861605; Emmanuel Arghiri, 1974, NEW LEFT REV, V85, P61; FRANK AG, 1967, CAPITALISM UNDERDEVE; GLASER WA, 1974, INT MIGR REV, V8, P227, DOI 10.2307/3002782; Haug J N, 1973, Inquiry, V10, P26; HOROWITZ MA, 1962, EMIGRACION TECNICOS; KIDD CV, 1967, 142 PAN AM HLTH ORG; MARGULIES H, 1969, FOREI…	21	47	49	0	3	CENTER MIGRATION STUDIES	STATEN ISL	209 FLAGG PLACE, STATEN ISL, NY 10304	0197-9183			INT MIGR REV	Int. Migr. Rev.		1976	2	10	4
J	Davenport, S				Davenport, S			Panic and panacea: brain drain and science and technology human capital policy	RESEARCH POLICY			English	Article						human capital; brain drain; moral panic; migration policy; research policy		Brain drain, the diffusion of skilled human capital, particularly scientific and technical human capital (STHC), from home to host country, is of concern to many nations. Traditional brain drain 'control' policies target the human capital embodied in a skilled individual. Based on a case study of brain drain panic in New Zealand in 2000, this paper explores new 'stimulation' brain drain policy ap…	Victoria Univ Wellington, Victoria Management Sch, Wellington, New Zealand	Davenport, S (corresponding author), Victoria Univ Wellington, Victoria Management Sch, POB 600, Wellington, New Zealand.	sally.davenport@vuw.ac.nz					BEDFORD R, 2001, NZ GEOGRAPHER, V57, P49, DOI DOI 10.1111/J.1745-7939.2001.TB01594.X; BEGGS M, 2001, GENERATION LOST ALTE, P9; Beine M, 2001, J DEV ECON, V64, P275, DOI 10.1016/S0304-3878(00)00133-4; BELICH J, 2001, P CATCH KNOWL WAV C, P1; Bozeman B, 2001, INT J TECHNOL MANAGE, V22, P716, DOI 10.1504/IJTM.2001.002988; Brown JS, 1991, ORGAN SCI, V2, P40, DOI 10.1287/orsc.2.1.40; BUSHNELL P, 2001,…	40	47	50	1	16	ELSEVIER	AMSTERDAM	RADARWEG 29, 1043 NX AMSTERDAM, NETHERLANDS	0048-7333	1873-7625		RES POLICY	Res. Policy	MAY	2004	4	33	4
J	Skeldon, R				Skeldon, Ronald			Of Skilled Migration, Brain Drains and Policy Responses	INTERNATIONAL MIGRATION			English	Article								Developed countries are increasingly trying to attract skilled migrants, rarely giving any consideration to the impact that this migration might have on countries of origin. The debate on the "brain drain'' is not new but it has taken on greater urgency in the context of a globalizing economy and ageing societies and this article reviews the evidence over time and space. It examines opposing inte…	Univ Sussex, Dept Geog, Brighton BN1 9RH, E Sussex, England	Skeldon, R (corresponding author), Univ Sussex, Dept Geog, Brighton BN1 9RH, E Sussex, England.						ACACIO K, 2007, WORKSH HUM RES HLTH; ADAMS W, 1968, BRAIN DRAIN, P1; AKIRE S, 2004, 73 HUM RES HLTH GLOB; ANARFI JK, JOINING BAN IN PRESS; Asis M., 2006, PHILIPPINES CULTURE; Bach Stephen, 2003, 209 INT LAB OFF; BAGASAO IF, 2005, REMITTANCES DEV IMPA, P133; BARRE R, 2003, DIASPORAS SCI; BHAGWATI J, 1976, BRAIN DRAIN TAXATION; BHAGWATI J, 2004, DEFENCE GLOBALIZATIO; BUCHAN J, 2007, IMPACT DEP HEAT…	58	47	47	1	24	WILEY	HOBOKEN	111 RIVER ST, HOBOKEN 07030-5774, NJ USA	0020-7985	1468-2435		INT MIGR	Int. Migr.	OCT	2009	5	47	4
J	Katz, R; Kornblet, S; Arnold, G; Lief, E; Fischer, JE				Katz, Rebecca; Kornblet, Sarah; Arnold, Grace; Lief, Eric; Fischer, Julie E.			Defining Health Diplomacy: Changing Demands in the Era of Globalization	MILBANK QUARTERLY			English	Article						Global health; diplomacy; foreign policy	GLOBAL HEALTH; BRAIN-DRAIN; PROFESSIONALS; BOYCOTT; NEED	Context: Accelerated globalization has produced obvious changes in diplomatic purposes and practices. Health issues have become increasingly preeminent in the evolving global diplomacy agenda. More leaders in academia and policy are thinking about how to structure and utilize diplomacy in pursuit of global health goals. Methods: In this article, we describe the context, practice, and components o…	[Kornblet, Sarah] Stimson Global Hlth Secur Program, Washington, DC 20036 USA; [Katz, Rebecca] George Washington Univ, Sch Publ Hlth & Hlth Services, Dept Hlth Policy, Washington, DC 20052 USA	Kornblet, S (corresponding author), Stimson Global Hlth Secur Program, 12th Floor,1111 19th St NW, Washington, DC 20036 USA.	skornblet@stimson.org					Abbott FM, 2005, AM J INT LAW, V99, P317, DOI 10.2307/1562501; ADAMS G, 2008, FOREIGN AFFAIRS BUDG; Adams V, 2008, MED ANTHROPOL, V27, P315, DOI 10.1080/01459740802427067; AGINAM O, 2010, GLOBAL HLTH GOVERNAN, V4; Amorim C, 2007, LANCET, V369, P1373, DOI 10.1016/S0140-6736(07)60498-X; BOURNE PG, 1978, PUBLIC HEALTH REP, V93, P114; *CDC, 2004, ANN REP 2004; *CDC, 2009, CDC ADV COMM DIR M O; *CDC, …	50	47	50	0	18	WILEY	HOBOKEN	111 RIVER ST, HOBOKEN 07030-5774, NJ USA	0887-378X	1468-0009		MILBANK Q	Milbank Q.	SEP	2011	5	89	3
J	Heitor, M; Horta, H; Mendonca, J				Heitor, Manuel; Horta, Hugo; Mendonca, Joana			Developing human capital and research capacity: Science policies promoting brain gain	TECHNOLOGICAL FORECASTING AND SOCIAL CHANGE			English	Article						Science policy; Brain gain; Human capital; Advanced training; Research system; Higher education system and reform	KNOWLEDGE; INTERNATIONALIZATION; COMPETITIVENESS; UNIVERSITIES	Science policies emphasizing the advanced qualification of human resources, together with democratizing access to science and internationalizing the science base, are shown to help build the conditions needed to drive brain gain over time. Exploring a new set of data for the period 1970-2010 in Portugal, this paper focuses on the analysis of flows of doctorates, with the ultimate goal of helping …	[Heitor, Manuel; Horta, Hugo; Mendonca, Joana] Univ Tecn Lisboa, Inst Super Tecn, Ctr Innovat Technol & Policy Res, Lisbon, Portugal	Heitor, M (corresponding author), Univ Tecn Lisboa, Inst Super Tecn, Ctr Innovat Technol & Policy Res, Lisbon, Portugal.	mheitor@ist.ut.pt; hugo.horta@ist.ut.pt; joana.mendonca@ist.utl.pt	Mendonca, Joana/R-4860-2019; Horta, Hugo/C-6327-2008	Mendonca, Joana/0000-0003-4151-7391; Horta, Hugo/0000-0001-6814-1393; heitor, manuel/0000-0003-2375-8642			Araujo ER, 2009, NEW TECH WORK EMPLOY, V24, P230, DOI 10.1111/j.1468-005X.2009.00231.x; Becher T., 2001, ACAD TRIBES TERRITOR; Behrman J. N., 2002, ECON DEV Q, V6, P115, DOI DOI 10.1177/089124249200600201; Bertoli S., 2011, BRAIN GAIN BRAIN DRA; Chacko E, 2007, GEOJOURNAL, V68, P131, DOI 10.1007/s10708-007-9078-8; Chaloff J., 2009, OECD SOCIAL EMPLOYME, V79; Chan D., 2012, SOTSIOL ISSLED+, V2, P1…	46	47	49	0	65	ELSEVIER SCIENCE INC	NEW YORK	STE 800, 230 PARK AVE, NEW YORK, NY 10169 USA	0040-1625	1873-5509		TECHNOL FORECAST SOC	Technol. Forecast. Soc. Chang.	FEB	2014	5	82
J	Imai, KS; Gaiha, R; Ali, A; Kaicker, N				Imai, Katsushi S.; Gaiha, Raghav; Ali, Abdilahi; Kaicker, Nidhi			Remittances, growth and poverty: New evidence from Asian countries	JOURNAL OF POLICY MODELING			English	Article						Remittances; Economic growth; Volatility; Poverty; Asia	FINANCIAL DEVELOPMENT; BRAIN-DRAIN; INSTITUTIONS	The present study re-examines the effects of remittances on growth of GDP per capita using annual panel data for 24 Asia and Pacific countries. The results generally confirm that remittance flows have been beneficial to economic growth. However, our analysis also shows that the volatility of capital inflows such as remittances and FDI is harmful to economic growth. This means that, while remittan…	[Imai, Katsushi S.; Ali, Abdilahi] Univ Manchester, Sch Social Sci, Manchester M13 9PL, Lancs, England; [Gaiha, Raghav] Harvard Univ, Sch Publ Hlth, Dept Global Hlth & Populat, Boston, MA 02115 USA; [Kaicker, Nidhi] Univ Delhi, Fac Management Studies, Delhi 110007, India	Imai, KS (corresponding author), Univ Manchester, Sch Social Sci, Dept Econ, Arthur Lewis Bldg,Oxford Rd, Manchester M13 9PL, Lancs, England.	Katsushi.Imai@manchester.ac.uk	Imai, Katsushi Imai/I-3595-2015	Imai, Katsushi Imai/0000-0001-7989-8914; Ali, Abdilahi/0000-0001-5398-0450			ADAMS RH, 2003, 2972 WORLD BANK; Adams RH, 2011, J DEV STUD, V47, P809, DOI 10.1080/00220388.2011.563299; ADB, 2011, IMP GLOB CRIS MIGR T; Barajas A, 2009, IMF STAFF PAPER, V52, P55; Beck T., 2009, POLICY RES WORKING P, V4943; Beine M, 2001, J DEV ECON, V64, P275, DOI 10.1016/S0304-3878(00)00133-4; Bekaert G, 2011, WORLD DEV, V39, P1, DOI 10.1016/j.worlddev.2010.06.016; Blundell RW, 2000, ADV ECO…	26	47	48	0	31	ELSEVIER SCIENCE INC	NEW YORK	STE 800, 230 PARK AVE, NEW YORK, NY 10169 USA	0161-8938	1873-8060		J POLICY MODEL	J. Policy Model.	MAY-JUN	2014	5	36	3
J	Tung, RL				Tung, Rosalie L.			New perspectives on human resource management in a global context	JOURNAL OF WORLD BUSINESS			English	Article							HOST COUNTRY NATIONALS; TALENT MANAGEMENT; ORGANIZATIONAL SUPPORT; EMERGING ECONOMIES; BRAIN-DRAIN; DIVERSITY; EXPATRIATE; IDENTITY; CULTURE; INDIA	In the past three decades or so, globalization/regionalization, migration and reverse migration (also referred to as "brain circulation"), the ascendancy of emerging markets, the demand for people with a global mindset, and the worldwide war for talent have brought about fundamental changes to the nature, magnitude, and raison d'etre for human resource management (HRM) in a global context. These …	[Tung, Rosalie L.] Simon Fraser Univ, Beedie Sch Business, 8888 Univ Dr, Burnaby, BC V5A 1S6, Canada	Tung, RL (corresponding author), Simon Fraser Univ, Beedie Sch Business, 8888 Univ Dr, Burnaby, BC V5A 1S6, Canada.	tung@sfu.ca					ADLER NJ, 1984, ORGAN DYN, V13, P66, DOI 10.1016/0090-2616(84)90019-6; Ahlstrom D, 2014, J WORLD BUS, V49, P572, DOI 10.1016/j.jwb.2013.12.010; Al Ariss A, 2014, J WORLD BUS, V49, P173, DOI 10.1016/j.jwb.2013.11.001; Andersen M., 2014, INT J HUM RESOUR MAN, V9, P525; [Anonymous], 2013, BUS PULS EXPL DUAL P; [Anonymous], 2013, OECD FDI IN FIG; [Anonymous], 2014, RIS GLOB CIT; [Anonymous], 2013, EX…	149	47	47	5	113	ELSEVIER SCIENCE INC	NEW YORK	STE 800, 230 PARK AVE, NEW YORK, NY 10169 USA	1090-9516	1878-5573		J WORLD BUS	J. World Bus.	JAN	2016	6	51	1
J	Bhargava, A; Docquier, F				Bhargava, Alok; Docquier, Frederic			HIV pandemic, medical brain drain, and economic development in Sub-Saharan Africa	WORLD BANK ECONOMIC REVIEW			English	Article							MODELS; TIME; AIDS	Country-level longitudinal data at three-year intervals over 1990-2004 are used to analyze the factors affecting emigration of physicians from Sub-Saharan countries and the effects of this medical brain drain on life expectancy and number of deaths due to AIDS. Data are compiled on emigrating African physicians from 16 receiving Organisation for Economic Co-operation and Development (OECD) countr…	[Bhargava, Alok] Univ Houston, Houston, TX 77004 USA; [Docquier, Frederic] Catholic Univ Louvain, B-3000 Louvain, Belgium	Bhargava, A (corresponding author), Univ Houston, Houston, TX 77004 USA.	bhargava@uh.edu; frederic.docquier@uclouvain.be					ANDERSON TW, 1981, J AM STAT ASSOC, V76, P598, DOI 10.2307/2287517; Awases M, 2003, MIGRATION HLTH PROFE; Barro RJ, 2001, OXFORD ECON PAP, V53, P541, DOI 10.1093/oep/53.3.541; Bell C, 2006, WORLD BANK ECON REV, V20, P55, DOI 10.1093/wber/lhj006; Belperio PS, 2004, AM J MED, V116, P27, DOI 10.1016/j.amjmed.2003.12.010; Bhagava A, 2001, J HEALTH ECON, V20, P423, DOI 10.1016/S0167-6296(01)00073-X; B…	34	46	47	1	13	OXFORD UNIV PRESS	OXFORD	GREAT CLARENDON ST, OXFORD OX2 6DP, ENGLAND	0258-6770	1564-698X		WORLD BANK ECON REV	World Bank Econ. Rev.		2008	5	22	2
J	Foley, CF; Kerr, WR				Foley, C. Fritz; Kerr, William R.			Ethnic Innovation and US Multinational Firm Activity	MANAGEMENT SCIENCE			English	Article						foreign direct investment; technology transfer; patents; innovation; research and development; ethnic networks; diasporas	RESEARCH-AND-DEVELOPMENT; KNOWLEDGE SPILLOVERS; INTERNATIONAL LABOR; BRAIN-DRAIN; NETWORKS; IMMIGRATION; MOBILITY; COUNTRY; MARKET; FLOWS	This paper studies the impact that ethnic innovators have on the global activities of U.S. firms by analyzing I detailed data on patent applications and on the operations of the foreign affiliates of U.S. multinational firms. The results indicate that increases in the share of a firm's innovation performed by inventors of a particular ethnicity are associated with increases in the share of that f…	[Foley, C. Fritz] Harvard Univ, Harvard Business Sch, Boston, MA 02163 USA; Natl Bur Econ Res, Cambridge, MA 02138 USA	Foley, CF (corresponding author), Harvard Univ, Harvard Business Sch, Boston, MA 02163 USA.	ffoley@hbs.edu; wkerr@hbs.edu			Division of Research of the Harvard Business School	The authors are grateful to Olof Aslund, Lee Branstetter, Bruno Cassiman, Michael Clemens, Exequiel Hernandez, Sari Kerr, Joan Muysken, Hillel Rapoport, Jasjit Singh, Bill Zeile, two referees, and seminar participants at the AFD-World Bank International Migration and Development Conference, the "American Economic Association, Baruch Business School, the Centre for Economic Policy Research Transna…	Agrawal A, 2006, J ECON GEOGR, V6, P571, DOI 10.1093/jeg/lbl016; Agrawal A, 2011, J URBAN ECON, V69, P43, DOI 10.1016/j.jue.2010.06.003; Alcacer J, 2007, MANAGE SCI, V53, P760, DOI 10.1287/mnsc.1060.0637; Alcacer J, 2012, MANAGE SCI, V58, P734, DOI 10.1287/mnsc.1110.1451; Almeida P, 1999, MANAGE SCI, V45, P905, DOI 10.1287/mnsc.45.7.905; Arora A, 2005, UNDERDOGS TIGERS RIS; BALAKRISHNAN S, 1993, …	70	46	47	3	49	INFORMS	CATONSVILLE	5521 RESEARCH PARK DR, SUITE 200, CATONSVILLE, MD 21228 USA	0025-1909	1526-5501		MANAGE SCI	Manage. Sci.	JUL	2013	5	59	7
J	Petrin, RA; Schafft, KA; Meece, JL				Petrin, Robert A.; Schafft, Kai A.; Meece, Judith L.			Educational Sorting and Residential Aspirations Among Rural High School Students What Are the Contributions of Schools and Educators to Rural Brain Drain?	AMERICAN EDUCATIONAL RESEARCH JOURNAL			English	Article						mixed-methods design; rural brain drain; latent class analysis; rural schools	ATTACHMENT; COMMUNITY; MIGRATION; GENDER; NUMBER	An extended body of research has documented the outmigration of the "best and brightest" youth from rural areas. Some of this scholarship has suggested that rural schools and educators may be complicit in this process as they devote extra attention and resources to the highest achieving students-those most likely to leave their rural communities after high school. Using data from a national multi…	[Petrin, Robert A.] Ipsos Publ Affairs Washington, Washington, DC 20006 USA; [Schafft, Kai A.] Penn State Univ, Coll Educ, University Pk, PA 16802 USA; [Meece, Judith L.] Univ N Carolina, Chapel Hill, NC 27515 USA	Petrin, RA (corresponding author), Ipsos Publ Affairs Washington, 2020 K St NW,Suite 410, Washington, DC 20006 USA.	robert.petrin@ipsos.com					Artz G., 2003, CHOICES, V4, P11; Bauch P. A., 2001, PEABODY J EDUC, V76, P204, DOI DOI 10.1207/S15327930PJE7602_9; Bollen K. A, 1989, STRUCTURAL EQUATIONS; Brown D.L., 2011, RURAL PEOPLE COMMUNI; Budge K., 2006, Journal of Research in Rural Education, V21, P1; Burnell B., 2003, J RES RURAL ED, V18, P104; Carr P. J., 2009, HOLLOWING OUT MIDDLE; Collins LM, 2010, LATENT CLASS LATENT; Corbett M., 20…	50	46	46	0	14	SAGE PUBLICATIONS INC	THOUSAND OAKS	2455 TELLER RD, THOUSAND OAKS, CA 91320 USA	0002-8312	1935-1011		AM EDUC RES J	Am. Educ. Res. J.	APR	2014	5	51	2
J	Batista, C; Lacuesta, A; Vicente, PC				Batista, Catia; Lacuesta, Aitor; Vicente, Pedro C.			Testing the 'brain gain' hypothesis: Micro evidence from Cape Verde	JOURNAL OF DEVELOPMENT ECONOMICS			English	Article						Brain drain; Brain gain; International migration; Human capital; Effects of emigration in origin countries; Sub-Saharan Africa	HUMAN-CAPITAL FORMATION; SELF-SELECTION; DRAIN; MIGRATION	Does emigration really drain human capital accumulation in origin countries? This paper explores a unique household survey designed and conducted to answer this research question. We analyze the case of Cape Verde, a country with allegedly the highest 'brain drain' in Africa, despite a marked record of income and human capital growth in recent decades. We propose the first explicit test of 'brain…	[Batista, Catia; Vicente, Pedro C.] Trin Coll Dublin, Dublin, Ireland; [Batista, Catia] IZA, Bonn, Germany; [Lacuesta, Aitor] Bank Spain, Madrid, Spain; [Vicente, Pedro C.] CSAE Univ Oxford, Oxford, England	Batista, C (corresponding author), Trin Coll Dublin, Dublin, Ireland.	catia.batista@tcd.ie; aitor.lacuesta@bde.es; vicentep@tcd.ie		Vicente, Pedro/0000-0002-9864-5012; Batista, Catia/0000-0001-9057-0397			Akee R, 2010, ECON DEV CULT CHANGE, V58, P323, DOI 10.1086/647978; ANGRIST JD, 1991, 115 NBER; Batista C., 2008, WHY DOESNT LABOR FLO; Batista C., 2007, 3035 IZA; Beine M, 2008, ECON J, V118, P631, DOI 10.1111/j.1468-0297.2008.02135.x; Belot M., 2008, 6675 CEPR; Bhagwati J., 1974, J DEV ECON, V1, P19, DOI DOI 10.1016/0304-3878(74)90020-0; BORJAS GJ, 1987, AM ECON REV, V77, P531; Chiquiar D, 2005,…	36	45	45	1	20	ELSEVIER SCIENCE BV	AMSTERDAM	PO BOX 211, 1000 AE AMSTERDAM, NETHERLANDS	0304-3878			J DEV ECON	J. Dev. Econ.	JAN	2012	5	97	1
J	Felbermayr, GJ; Toubal, F				Felbermayr, Gabriel J.; Toubal, Farid			Revisiting the Trade-Migration Nexus: Evidence from New OECD Data	WORLD DEVELOPMENT			English	Article						migration; international trade; gravity equation	HUMAN-CAPITAL FORMATION; BRAIN-DRAIN; NETWORKS; IMMIGRATION; GROWTH	International migrants contribute to bilateral trade creation if their presence reduces information costs or entails additional demand for goods from their source countries. Using new data on stocks of foreign-born individuals by skill class, we try to separately quantify those two channels. We assume that improved information affects host countries' imports and exports symmetrically, while the p…	[Felbermayr, Gabriel J.] Univ Munich, Leibniz Inst Econ Res, Ifo Inst, D-80539 Munich, Germany; [Toubal, Farid] Paris Sch Econ, Paris, France	Felbermayr, GJ (corresponding author), Univ Munich, Leibniz Inst Econ Res, Ifo Inst, D-80539 Munich, Germany.						Anderson JE, 2003, AM ECON REV, V93, P170, DOI 10.1257/000282803321455214; Anderson JE, 2004, J ECON LIT, V42, P691, DOI 10.1257/0022051042177649; Beine M, 2001, J DEV ECON, V64, P275, DOI 10.1016/S0304-3878(00)00133-4; Beine M, 2008, ECON J, V118, P631, DOI 10.1111/j.1468-0297.2008.02135.x; Combes PP, 2005, J INT ECON, V66, P1, DOI 10.1016/j.jinteco.2004.07.003; Davis DR, 2002, AM ECON REV, V92,…	23	45	45	0	22	PERGAMON-ELSEVIER SCIENCE LTD	OXFORD	THE BOULEVARD, LANGFORD LANE, KIDLINGTON, OXFORD OX5 1GB, ENGLAND	0305-750X			WORLD DEV	World Dev.	MAY	2012	5	40	5
J	Wang, D				Wang, Dan			Activating Cross-border Brokerage: Interorganizational Knowledge Transfer through Skilled Return Migration	ADMINISTRATIVE SCIENCE QUARTERLY			English	Article						knowledge transfer; brokerage; return migration; employee mobility	ABSORPTIVE-CAPACITY; STRUCTURAL HOLES; SOCIAL NETWORKS; HOST COUNTRY; BRAIN-DRAIN; WEAK TIES; MOBILITY; INNOVATION; EMBEDDEDNESS; COLLABORATION	Using an original dataset of 4,183 former J-1 Visa holders from 81 countries-all of whom had worked in the U.S.-I examine how skilled return migrants, as cross-border brokers, transfer knowledge about organizational practices from abroad to their home countries. I hypothesize that returnees' knowledge transfer success depends on their embeddedness in both their home-and host-country workplaces an…	Columbia Univ, Grad Sch Business, New York, NY 10027 USA	Wang, D (corresponding author), Columbia Univ, Grad Sch Business, New York, NY 10027 USA.				Kauffman Foundation Dissertation Fellowship Grant	This research was partially supported by a Kauffman Foundation Dissertation Fellowship Grant. I am grateful to Mark Granovetter, Woody Powell, Andy Walder, Natasha Iskander, Elena Obukhova, Waverly Ding, Rajshree Agarwal, Phil Kim, David Obstfeld, Sarah Soule, Rory McDonald, Emily Cox, Amir Goldberg, Damon Phillips, Bruce Kogut, Paul Ingram, and members of the Networks and Organizations Workshop …	Adler N. J., 1981, GROUP ORGAN STUD, V6, P341, DOI DOI 10.1177/105960118100600310; Adler PS, 2002, ACAD MANAGE REV, V27, P17, DOI 10.2307/4134367; Ahuja G, 2000, ADMIN SCI QUART, V45, P425, DOI 10.2307/2667105; Almeida P, 1999, MANAGE SCI, V45, P905, DOI 10.1287/mnsc.45.7.905; Almeida P, 1996, STRATEGIC MANAGE J, V17, P155, DOI 10.1002/smj.4250171113; Ambos TC, 2009, J INT MANAG, V15, P1, DOI 10.…	123	45	46	7	124	SAGE PUBLICATIONS INC	THOUSAND OAKS	2455 TELLER RD, THOUSAND OAKS, CA 91320 USA	0001-8392	1930-3815		ADMIN SCI QUART	Adm. Sci. Q.	MAR	2015	6	60	1
J	Mayr, K; Peri, G				Mayr, Karin; Peri, Giovanni			Brain Drain and Brain Return: Theory and Application to Eastern-Western Europe	B E JOURNAL OF ECONOMIC ANALYSIS & POLICY			English	Article						skilled migration; return migration; returns to education; Eastern-Western Europe	HUMAN-CAPITAL FORMATION; MIGRATION; GROWTH; PERSPECTIVE; MIGRANTS; COUNTRY	This paper develops a novel model of optimal education, migration and return by heterogeneous, forward-looking agents. The model is parameterized and simulated to analyze the effects of immigration policies, identifying the brain-drain, brain-gain and brain-return effects when barriers to migration are reduced. We use parameters from the literature to inform our model and simulate migration and r…	[Mayr, Karin] Univ Vienna, Dept Econ, A-1010 Vienna, Austria; [Peri, Giovanni] Univ Calif Davis, Dept Econ, Davis, CA 95616 USA	Mayr, K (corresponding author), Univ Vienna, Dept Econ, Hohenstaufengasse 9, A-1010 Vienna, Austria.	karin.mayr@univie.ac.at; gperi@ucdavis.edu					Acemoglu D, 2002, REV ECON STUD, V69, P781, DOI 10.1111/1467-937X.00226; Barrett A., 2001, ECON SOC REV, V32, P1; Barro R. J., 2000, 42 CID; Batista C., 2007, 3035 IZA; Beine M, 2001, J DEV ECON, V64, P275, DOI 10.1016/S0304-3878(00)00133-4; Beine M, 2008, ECON J, V118, P631, DOI 10.1111/j.1468-0297.2008.02135.x; BHAGWATI J, 1976, BRAIN DRAIN TAXATION; BHAGWATI J, 1996, J DEV ECON, V2, P195; Bhag…	40	44	44	1	21	BERKELEY ELECTRONIC PRESS	BERKELEY	2809 TELEGRAPH AVENUE, STE 202, BERKELEY, CA 94705 USA	1935-1682			BE J ECON ANAL POLI	B E J. Econ. Anal. Policy		2009	5	9	1
J	Baruch, Y; Altman, Y; Tung, RL				Baruch, Yehuda; Altman, Yochanan; Tung, Rosalie L.			Career Mobility in a Global Era: Advances in Managing Expatriation and Repatriation	ACADEMY OF MANAGEMENT ANNALS			English	Article							SELF-INITIATED EXPATRIATION; PERCEIVED ORGANIZATIONAL SUPPORT; HUMAN-RESOURCE MANAGEMENT; INTERNATIONAL ASSIGNMENTS; BRAIN-DRAIN; MULTINATIONAL-CORPORATION; PSYCHOLOGICAL CONTRACT; WORKPLACE SPIRITUALITY; EMPIRICAL-EXAMINATION; FOREIGN SUBSIDIARIES	The surge of interest in expatriation and repatriation within the broader discourse on labor mobility of professionals and high-skilled labor, human capital development, and the theory and practice of people management serves as the backdrop to this paper. We propose that expatriation and repatriation be framed in the context of global careers and embedded in the wider social-economic environment…	[Baruch, Yehuda] Univ Southampton, Southampton Business Sch, Southampton SO9 5NH, Hants, England; [Altman, Yochanan] Middlesex Univ, Sch Business, London N17 8HR, England; [Tung, Rosalie L.] Simon Fraser Univ, Beedie Sch Business, Burnaby, BC V5A 1S6, Canada	Baruch, Y (corresponding author), Univ Southampton, Southampton Business Sch, Southampton SO9 5NH, Hants, England.	y.baruch@soton.ac.uk					Adler N. J., 1981, GROUP ORGAN STUD, V6, P341, DOI DOI 10.1177/105960118100600310; Adler N. J., 1979, INT J INTERCULTURAL, V3, P407, DOI [10.1016/0147-1767(79)90006-3, DOI 10.1016/0147-1767(79)90006-3]; ADLER NJ, 1984, CALIF MANAGE REV, V26, P78, DOI 10.2307/41165099; Afsar B, 2015, J MANAG SPIRITUAL RE, V12, P329, DOI 10.1080/14766086.2015.1060515; Aguzzoli R, 2014, HUM RELAT, V67, P587, DOI 10.…	270	44	44	5	65	ACAD MANAGEMENT	BRIARCLIFF MANOR	PACE UNIV, PO BOX 3020, 235 ELM RD, BRIARCLIFF MANOR, NY 10510-8020 USA	1941-6520	1941-6067		ACAD MANAG ANN	Acad. Manag. Ann.		2016	6	10	1
J	Meisenberg, G; Lawless, E; Lambert, E; Newton, A				Meisenberg, G; Lawless, E; Lambert, E; Newton, A			The Flynn effect in the Caribbean: Generational change of cognitive test performance in Dominica	MANKIND QUARTERLY			English	Article						Flynn effect; intelligence; IQ; Afro-Caribbean; Amerindian; Dominica; Raven's Progressive Matrices; migration; brain drain; aging effects; economic development; cultural evolution	MASSIVE IQ GAINS; SEX-DIFFERENCES; CRYSTALLIZED INTELLIGENCE; PROGRESSIVE MATRICES; GENDER-DIFFERENCES; VERBAL-ABILITY; SECULAR TRENDS; MEAN IQ; CHILDREN; HYPOTHESIS	Mental ability, as assessed by standardized tests, is not fixed in time. Large IQ gains have been recorded in many industrialized countries during the 20th century, but very little is known about IQ trends in the less developed countries. The present study investigates generational changes in mental test performance on the Caribbean island of Dominica. In a cross-sectional design, Raven's Standar…	Ross Univ, Roseau, Dominica	Meisenberg, G (corresponding author), Ross Univ, Roseau, Dominica.	Gmeisenberg@rossmed.edu.dm					Beiser M, 2000, PSYCHOL SCHOOLS, V37, P237, DOI 10.1002/(SICI)1520-6807(200005)37:3<237::AID-PITS4>3.0.CO;2-N; Blair C, 2005, INTELLIGENCE, V33, P93, DOI 10.1016/j.intell.2004.07.008; Boaz NT, 2004, AM J HUM BIOL, V16, P195; Carroll J.B., 1993, HUMAN COGNITIVE ABIL; Cattell RB, 1950, EUGEN REV, V42, P136; CATTELL RB, 1963, J EDUC PSYCHOL, V54, P1, DOI 10.1037/h0046743; CECI SJ, 1991, DEV PSYCHOL,…	73	43	43	0	6	COUNCIL SOCIAL & ECONOMIC STUDIES	WASHINGTON	1133 13TH ST, NW #C-2, WASHINGTON, DC 20005 USA	0025-2344			MANKIND QUART	Mankind Q.	FAL	2005	5	46	1
J	Alam, GM; Hoque, KE				Alam, Gazi Mahabubul; Hoque, Kazi Enamul			Who gains from "brain and body drain" business - developing/developed world or individuals: A comparative study between skilled and semi/unskilled emigrants	AFRICAN JOURNAL OF BUSINESS MANAGEMENT			English	Article						Brain drain; first world; physical drain; public money; highly skilled people; working environment	BANGLADESH; EDUCATION	A theory often advanced is that the 'brain drain' of third world graduates to the first world generates a high income of foreign currency, and that this income contributes to the development of third world, In this paper, however, we put forward the theory that semi/unskilled emigrants currently contribute the higher income of foreign currency. Although the highly skilled group may earn higher wa…	[Alam, Gazi Mahabubul; Hoque, Kazi Enamul] Univ Malaya, Fac Educ, Kuala Lumpur 50603, Malaysia	Alam, GM (corresponding author), Univ Malaya, Fac Educ, Kuala Lumpur 50603, Malaysia.	gazi.alam@um.edu.my	HOQUE, KAZI/B-8758-2010; ALAM, GAZI MAHABUBUL ALAM/B-5192-2010; Hoque, Kazi E/N-1170-2017				A Claudia Martinez, 2005, INT MIGRATION REMITT; AGRAWAL A, 2008, BRAIN DRAIN BRAIN BA; Alam G. M., 2008, J BUS STUD, V4, P117; Alam GM, 2009, AFR J AGR RES, V4, P1334; Alam GM, 2009, AFR J BUS MANAGE, V3, P567; Alam GM, 2009, AFR J BUS MANAGE, V3, P463; Alam GM., 2008, IMPACT PRIVATE U BAN; ALAM GM, 2009, RES ESSAYS, V4, P1260; APPLETON S, 2000, 33 HARV U CTR INT DE; Barro RJ, 2001, OXFORD ECON P…	45	43	43	1	12	ACADEMIC JOURNALS	VICTORIA ISLAND	P O BOX 5170-00200 NAIROBI, VICTORIA ISLAND, LAGOS 73023, NIGERIA	1993-8233			AFR J BUS MANAGE	Afr. J. Bus. Manag.	APR	2010	5	4	4
J	Beine, M; Docquier, F; Oden-Defoort, C				Beine, Michel; Docquier, Frederic; Oden-Defoort, Cecily			A Panel Data Analysis of the Brain Gain	WORLD DEVELOPMENT			English	Article						human capital; convergence; brain drain	HUMAN-CAPITAL FORMATION; DRAIN; MIGRATION; GROWTH; SUBSTITUTE; EDUCATION	In this paper, we revisit the impact of skilled emigration on human capital accumulation using new panel data covering 147 countries during the period 1975-2000. We derive testable predictions from a stylized theoretical model and test them in dynamic regression models. Our empirical analysis predicts conditional convergence of human capital indicators. Our findings also reveal that skilled migra…	[Beine, Michel] Univ Luxemburg, Luxembourg, Luxembourg; [Beine, Michel] CES Ifo, Luxembourg, Luxembourg; [Docquier, Frederic] Catholic Univ Louvain, FNRS, Louvain, Belgium; [Docquier, Frederic] Catholic Univ Louvain, IRES, Louvain, Belgium; [Oden-Defoort, Cecily] Univ Lille, EQUIPPE, Lille, France	Beine, M (corresponding author), Univ Luxemburg, Luxembourg, Luxembourg.						ARELLANO M, 1991, REV ECON STUD, V58, P277, DOI 10.2307/2297968; ARELLANO M, 1995, J ECONOMETRICS, V68, P29, DOI 10.1016/0304-4076(94)01642-D; Azariadis C., 2005, HDB EC GROWTH, V1; Barro RJ, 2001, OXFORD ECON PAP, V53, P541, DOI 10.1093/oep/53.3.541; BATISTA C, 2008, 282 IIIS; Beine M, 2001, J DEV ECON, V64, P275, DOI 10.1016/S0304-3878(00)00133-4; BEINE M, 2009, IZA DISCUSS IN PRESS, V4293; Bei…	38	43	44	0	19	PERGAMON-ELSEVIER SCIENCE LTD	OXFORD	THE BOULEVARD, LANGFORD LANE, KIDLINGTON, OXFORD OX5 1GB, ENGLAND	0305-750X			WORLD DEV	World Dev.	APR	2011	5	39	4
J	Pachanee, CA; Wibulpolprasert, S				Pachanee, Cha-Aim; Wibulpolprasert, Suwit			Incoherent policies on universal coverage of health insurance and promotion of international trade in health services in Thailand	HEALTH POLICY AND PLANNING			English	Article						universal access; health insurance; private health providers; trade in health services; human resources for health; brain drain; health care equity		The Thai government has implemented universal coverage of health insurance since October 2001. Universal access to antiretroviral (ARV) drugs has also been included since October 2003. These two policies have greatly increased the demand for health services and human resources for health, particularly among public health care providers. After the 1997 economic crisis, private health care provider…	Minist Publ Hlth, Off Permanent Secretary, Bur Policy & Strategy, Int Hlth Off, Nonthaburi 11000, Thailand	Pachanee, CA (corresponding author), Minist Publ Hlth, Off Permanent Secretary, Bur Policy & Strategy, Int Hlth Off, Tiwanond Rd, Nonthaburi 11000, Thailand.	chaaim@health.moph.go.th; suwit@health.moph.go.th					*ABAC KSC INT POLL, 2004, RES SAT SURV UC 2003; *BOARD INV THAIL, 2004, INV DAT; BUDHASRI W, 2003, PRIVATE HOSP IND THA; CHALAMWONG Y, 2005, TDRI Q REV JUN; CHANA R, 2001, WG4 WHO COMM MACR HL; *DIV SERV BUS, 2003, HOSP SERV BUS; *MIN COMM DEP EXP, 2002, UNPUB QUEST SURV FOR; *MIN COMM DEP TRAD, 2004, DOC PUBL HEAR SESS T; *MIN PUBL HLTH, 2004, REC LOSS GOV OFF; *MIN PUBL HLTH BUR, 2004, THAIL CT…	26	42	43	0	19	OXFORD UNIV PRESS	OXFORD	GREAT CLARENDON ST, OXFORD OX2 6DP, ENGLAND	0268-1080	1460-2237		HEALTH POLICY PLANN	Health Policy Plan.	JUL	2006	5	21	4
J	Csedo, K				Csedo, Krisztina			Negotiating skills in the global city: Hungarian and Romanian professionals and graduates in London	JOURNAL OF ETHNIC AND MIGRATION STUDIES			English	Article						International labour migration; skilled migration; global cities; London; employability; human capital	BRAIN-DRAIN; MIGRATION; GENDER; EUROPE	The international mobility of professionals and graduates is one of the most dynamic transnational types of movement and represents an increasingly large component of global migration streams. The global competition for talent, the expansion of the knowledge economy and the increasing globalisation of markets and companies contribute to the increased importance of these mobility flows. Yet academ…	[Csedo, Krisztina] Univ London London Sch Econ & Polit Sci, London WC2A 2AE, England	Csedo, K (corresponding author), London Sch Econ, Dept Sociol, Houghton St, London WC2A 2AE, England.	K.Csedo@lse.ac.uk					ADAMS RH, 2003, 3069 WORLD BANK; Batalova J., 2006, HUMAN FACE GLOBAL MO, P81; Beaverstock JV, 2005, J ETHN MIGR STUD, V31, P245, DOI 10.1080/1369183042000339918; Beaverstock JV, 1996, URBAN STUD, V33, P1377, DOI 10.1080/0042098966709; Bills David B., 2004, SOCIOLOGY ED WORK; Bourdieu P., 1983, SOZIALE UNGLEICHHEIT, V2, P183, DOI DOI 10.1007/978-3-531-18944-4; CANCEDDA A, 2005, SKILLED MIGRANTS I…	37	42	42	1	18	ROUTLEDGE JOURNALS, TAYLOR & FRANCIS LTD	ABINGDON	4 PARK SQUARE, MILTON PARK, ABINGDON OX14 4RN, OXFORDSHIRE, ENGLAND	1369-183X			J ETHN MIGR STUD	J. Ethn. Migr. Stud.		2008	5	34	5
J	Bhargava, A; Docquier, F; Moullan, Y				Bhargava, Alok; Docquier, Frederic; Moullan, Yasser			Modeling the effects of physician emigration on human development	ECONOMICS & HUMAN BIOLOGY			English	Article						Human development indicators; Economic development; Physician emigration; Random effects models; Simultaneity	HEALTH-CARE INFRASTRUCTURE; MEDICAL BRAIN-DRAIN; SUB-SAHARAN AFRICA; MIGRATION; EQUATIONS; GROWTH; LOSERS; TIME	We analyzed the effects of physician emigration on human development indicators in developing countries. First, the geographical distribution of physician brain drain was documented for the period 1991-2004. Second, random and fixed effects models were employed to investigate the effects of physicians in the home countries and abroad on child mortality and vaccination rates. Third, models were es…	[Bhargava, Alok] Univ Houston, Dept Econ, Houston, TX 77204 USA; [Docquier, Frederic] Catholic Univ Louvain, FNRS, B-3000 Louvain, Belgium; [Docquier, Frederic] Catholic Univ Louvain, IRES, B-3000 Louvain, Belgium; [Moullan, Yasser] Univ Paris 01, CES, Pantheon Sorbonne, France	Bhargava, A (corresponding author), Univ Houston, Dept Econ, 4800 Calhoun, Houston, TX 77204 USA.	bhargava@uh.edu; frederic.docquier@uclouvain.be; yasser.moullan@univ-paris1.fr			Belgian French-speaking Community	This paper describes and analyzes an improved database on physician emigration that is available at http://perso.uclouvain.be/frederic.docquier/oxlight.htm. This research is part of the project "Brain drain, return migration and South-South migration: impact on labor markets and human capital" supported by the Austrian, German, Korean, and Norwegian governments through the Multi-donor Trust Fund …	Barro Robert J., 2003, EC GROWTH; BATISTA C, 2009, 282 IIIS; Beecham L, 2002, BRIT MED J, V325, P66, DOI 10.1136/bmj.325.7355.66; Beine M, 2001, J DEV ECON, V64, P275, DOI 10.1016/S0304-3878(00)00133-4; Beine M, 2008, ECON J, V118, P631, DOI 10.1111/j.1468-0297.2008.02135.x; Bhagava A, 2001, J HEALTH ECON, V20, P423, DOI 10.1016/S0167-6296(01)00073-X; BHARGAVA A, 1982, REV ECON STUD, V49, P533, D…	33	42	43	1	11	ELSEVIER SCIENCE BV	AMSTERDAM	PO BOX 211, 1000 AE AMSTERDAM, NETHERLANDS	1570-677X	1873-6130		ECON HUM BIOL	Econ. Hum. Biol.	MAR	2011	5	9	2
J	Marx, M; Singh, J; Fleming, L				Marx, Matt; Singh, Jasjit; Fleming, Lee			Regional disadvantage? Employee non-compete agreements and brain drain	RESEARCH POLICY			English	Article						Non-compete agreements; Labor mobility; Regional economics	EMPIRICAL-ANALYSIS; KNOWLEDGE; MOBILITY; SPECIALIZATION; DETERMINANTS; MIGRATION; NETWORKS	A growing body of research has documented the local impact of employee non-compete agreements, but their effect on interstate migration patterns remains unexplored. Exploiting an inadvertent policy reversal in Michigan as a natural experiment, we show that non-compete agreements are responsible for a "brain drain" of knowledge workers out of states that enforce such contracts to states where they…	[Marx, Matt] MIT, Sloan Sch Management, Cambridge, MA 02142 USA; [Singh, Jasjit] INSEAD, Singapore 138676, Singapore; [Fleming, Lee] Univ Calif Berkeley, Berkeley, CA 94720 USA	Marx, M (corresponding author), MIT, Sloan Sch Management, 100 Main St,E62-478, Cambridge, MA 02142 USA.	mmarx@mit.edu; singh@insead.edu; Ifleming@berIceley.edu					Agrawal A., 2006, J EC GEOGRAPHY, V6; Almeida P, 1999, MANAGE SCI, V45, P905, DOI 10.1287/mnsc.45.7.905; Alterman I., 1985, MICHIGAN BAR J MAR; Belenzon S., 2013, REV ECON STAT, V95, P1066; Bertrand M, 2004, Q J ECON, V119, P249, DOI 10.1162/003355304772839588; Blackburn ML, 2010, J ECON GEOGR, V10, P87, DOI 10.1093/jeg/lbp020; Borchers Callum, 2014, BOSTON GLOBE; BORJAS GJ, 1992, J URBAN ECON, V…	52	42	42	0	46	ELSEVIER	AMSTERDAM	RADARWEG 29, 1043 NX AMSTERDAM, NETHERLANDS	0048-7333	1873-7625		RES POLICY	Res. Policy	MAR	2015	6	44	2
J	CHANG, SL				CHANG, SL			CAUSES OF BRAIN-DRAIN AND SOLUTIONS - THE TAIWAN EXPERIENCE	STUDIES IN COMPARATIVE INTERNATIONAL DEVELOPMENT			English	Article								Over the years, Taiwan has experienced "brain drain," as more than 80 percent of its students who completed their graduate study in the United States have failed to return. Instead, they have found their ways into the faculties of American colleges and universities or employment opportunities in various research organizations and industries. This article examines brain drain, its origin in Taiwan…		CHANG, SL (corresponding author), LOCK HAVEN UNIV,STEVENSON LIB,DEPT LIB SERV,LOCK HAVEN,PA 17745, USA.						KAO CHC, 1971, BRAIN DRAIN CASE STU; Liao CC., 1984, RES ANAL EMPLOYMENT; *NAT YOUTH COMM, 1987, HELP HAND OV SCHOL; Niland John R., 1970, ASIAN ENG BRAIN DRAI; *UN GEN ASS, 1968, OUTFL TRAIN PERS DEV; *US HOUS REPR RES, 1967, BRAIN DRAIN US SCI E; WEI Y, 1974, 15 INT STUD ASS WORK; YAO S, 1981, STUDY CHINESE STUDEN	8	41	42	2	16	TRANSACTION PERIOD CONSORTIUM	NEW BRUNSWICK	DEPT 3091 RUTGERS-THE STATE UNIV OF NJ, NEW BRUNSWICK, NJ 08903	0039-3606			STUD COMP INT DEV	Stud. Comp. Int. Dev.	SPR	1992	3	27	1
J	Peixoto, J				Peixoto, J			The international mobility of highly skilled workers in transnational corporations: The macro and micro factors of the organizational migration of Cadres	INTERNATIONAL MIGRATION REVIEW			English	Article							MULTINATIONAL-ENTERPRISES; DETERMINANTS; IMMIGRATION; MANAGERS; EUROPE	The worldwide movement of highly skilled workers (cadres) in transnational corporations has long been known to literature in the field, yet has not been thoroughly researched. The mechanisms governing their international circulation are, in themselves, somewhat specific. The fact that they use an organizational "channel" for migration means that the constraints differ from those that act on "inde…	Univ Tecn Lisboa, P-1100 Lisbon, Portugal	Peixoto, J (corresponding author), Univ Tecn Lisboa, P-1100 Lisbon, Portugal.			Peixoto, Joao/0000-0001-8321-3420			APPLEYARD R, 1991, INT MIGRATION CHALLE; APPLEYARD RT, 1995, EUR MIGR MULT NEW TR; ATKINSON J, 1989, 179 IMS U SUSS; Baganha M I, 1998, J Ethn Migr Stud, V24, P367; Bartlett C.A., 1989, MANAGING BORDERS TRA; BREWSTER C, 1988, MANAGEMENT EXPATRIAT; Castles Stephen, 1993, AGE MIGRATION INT PO; EDSTROM A, 1977, ADMIN SCI QUART, V22, P248, DOI 10.2307/2391959; Ferrao Joao, 1994, TRANSNATIONAL CORPOR,…	39	41	45	0	21	WILEY-BLACKWELL	MALDEN	COMMERCE PLACE, 350 MAIN ST, MALDEN 02148, MA USA	0197-9183			INT MIGR REV	Int. Migr. Rev.	WIN	2001	4	35	4
J	Arah, OA; Ogbu, UC; Okeke, CE				Arah, Onyebuchi A.; Ogbu, Uzor C.; Okeke, Chukwudi E.			Too poor to leave, too rich to stay: Developmental and global health correlates of physician migration to the United States, Canada, Australia, and the United Kingdom	AMERICAN JOURNAL OF PUBLIC HEALTH			English	Article							BRAIN-DRAIN; DEVELOPING-COUNTRIES; HUMAN-RESOURCES; PROFESSIONALS; DOCTORS; CRISIS; METRICS; AFRICA; VIEWS; NEEDS	Objectives. We analyzed the relationship between physician migration from developing source countries to more developed host countries (brain drain) and the developmental and global health profiles of source countries. Methods. We used a cross-section of 141 countries that lost emigrating physicians to the 4 major destinations: the United States, Canada, Australia, and the United Kingdom. For eac…	[Arah, Onyebuchi A.] Univ Amsterdam, Acad Med Ctr, Dept Social Med, NL-1100 DE Amsterdam, Netherlands; [Arah, Onyebuchi A.; Ogbu, Uzor C.] Natl Inst Publ Hlth & Environm, Ctr Prevent & Hlth Serv Res, NL-3720 BA Bilthoven, Netherlands; [Ogbu, Uzor C.] Univ Amsterdam, Acad Med Ctr, Dept Social Med, NL-1105 AZ Amsterdam, Netherlands; [Okeke, Chukwudi E.] Univ Nigeria, Teaching Hosp, Dept Radiat Med,…	Arah, OA (corresponding author), Univ Amsterdam, Acad Med Ctr, Dept Social Med, POB 22700, NL-1100 DE Amsterdam, Netherlands.	o.a.arah@amc.uva.nl		Ogbu, Uzor/0000-0002-6438-9110; Arah, Onyebuchi/0000-0002-9067-1697			Adams O, 2004, B WORLD HEALTH ORGAN, V82, P560; Ahmad OB, 2005, BRIT MED J, V331, P43, DOI 10.1136/bmj.331.7507.43; American Medical Association, AMA PHYS MAST; Anand S, 2004, LANCET, V364, P1603, DOI 10.1016/S0140-6736(04)17313-3; [Anonymous], WORLD DIR MED SCH; Arah OA, 2006, LANCET, V368, P28, DOI 10.1016/S0140-6736(06)68965-4; ASHENFELTER O, 2003, STAT ECONOMETRICS ME; Astor A, 2005, SOC SCI …	42	41	44	0	14	AMER PUBLIC HEALTH ASSOC INC	WASHINGTON	800 I STREET, NW, WASHINGTON, DC 20001-3710 USA	0090-0036			AM J PUBLIC HEALTH	Am. J. Public Health	JAN	2008	5	98	1
J	Iranzo, S; Peri, G				Iranzo, Susana; Peri, Giovanni			Migration and trade: Theory with an application to the Eastern-Western European integration	JOURNAL OF INTERNATIONAL ECONOMICS			English	Article						Skilled migration; Gains from variety; Real wages; Eastern-western Europe	INTERNATIONAL-TRADE; BRAIN-DRAIN; ECONOMIC-GROWTH; FACTOR MOBILITY; US STATES; GLOBALIZATION; TECHNOLOGY; COUNTRIES; EDUCATION; NETWORKS	The remarkable increase in trade flows and in migratory flows of highly educated people are two important features of globalization of the last decades. This paper extends a two-country model of inter- and intra-industry trade to a rich environment featuring technological differences, skill differences and the possibility of international labor mobility. The model is used to explain the patterns …	[Peri, Giovanni] Univ Calif Davis, Davis, CA 95616 USA; [Iranzo, Susana] Univ Rovira & Virgili, Reus 43204, Spain; [Peri, Giovanni] CESifo, Munich, Germany; [Peri, Giovanni] NBER, Cambridge, MA 02138 USA	Peri, G (corresponding author), Univ Calif Davis, 1 Shields Ave, Davis, CA 95616 USA.	susana.iranzo@urv.cat; gperi@ucdavis.edu	Iranzo, Susana/AAA-4603-2019	Iranzo, Susana/0000-0003-3083-1342			Barro RJ, 2001, OXFORD ECON PAP, V53, P541, DOI 10.1093/oep/53.3.541; Beine M, 2001, J DEV ECON, V64, P275, DOI 10.1016/S0304-3878(00)00133-4; Benhabib Jess, 2007, 12871 NBER; Bhagwati J., 1974, J DEV ECON, V1, P19, DOI DOI 10.1016/0304-3878(74)90020-0; BHAGWATI JN, 1975, J DEV ECON, V2, P195, DOI DOI 10.1016/0304-3878(75)90002-4; Boeri T, 2005, ECON POLICY, P629; Borjas GJ, 1996, J DEV ECON, V51…	44	41	41	0	33	ELSEVIER SCIENCE BV	AMSTERDAM	PO BOX 211, 1000 AE AMSTERDAM, NETHERLANDS	0022-1996			J INT ECON	J. Int. Econ.	SEP	2009	5	79	1
J	Beine, M; Docquier, F; Schiff, M				Beine, Michel; Docquier, Frederic; Schiff, Maurice			International migration, transfer of norms and home country fertility	CANADIAN JOURNAL OF ECONOMICS-REVUE CANADIENNE D ECONOMIQUE			English	Article							RURAL-URBAN MIGRATION; BRAIN-DRAIN; ECONOMIC-GROWTH; IMPACT; URBANIZATION; NETWORKS; TRADE; WOMEN; LABOR	This paper examines the relationship between international migration and source country fertility. The impact of international migration on source country fertility may have a number of causes, including a transfer of destination countries' fertility norms. We provide a rigorous test of the diffusion of fertility norms using highly detailed original data on migration. Our results provide evidence…	[Beine, Michel] Univ Luxemburg, Luxembourg, Luxembourg; [Docquier, Frederic] Catholic Univ Louvain, IRES, Louvain, Belgium; [Schiff, Maurice] World Bank, Washington, DC USA	Beine, M (corresponding author), Univ Luxemburg, Luxembourg, Luxembourg.	schiffmarice@yahoo.com					Beine M, 2001, J DEV ECON, V64, P275, DOI 10.1016/S0304-3878(00)00133-4; Beine M, 2008, ECON J, V118, P631, DOI 10.1111/j.1468-0297.2008.02135.x; BENPORATH Y, 1973, J POLIT ECON, V81, pS202, DOI 10.1086/260162; BROCKERHOFF M, 1995, J BIOSOC SCI, V27, P347, DOI 10.1017/S0021932000022872; Chen HJ, 2006, J POPUL ECON, V19, P725, DOI 10.1007/s00148-005-0023-1; de la Croix D, 2004, J DEV ECON, V73, P6…	44	40	40	2	26	WILEY	HOBOKEN	111 RIVER ST, HOBOKEN 07030-5774, NJ USA	0008-4085	1540-5982		CAN J ECON	Can. J. Econ.-Rev. Can. Econ.	NOV	2013	5	46	4
J	Van Parijs, P				Van Parijs, P			The ground floor of the world: On the socio-economic consequences of linguistic globalization	INTERNATIONAL POLITICAL SCIENCE REVIEW			English	Article						brain drain; linguistic diversity; minorities; welfare state; world lingua franca	LANGUAGE	As English emerges as the first world-wide lingua franca, countries whose native language is not English increasingly face the following dilemma: either they will have to lose their soul (by switching off the protection of their national language and culture) or they will have to lose their heart (by scaling down the redistributive component of their welfare state). This conclusion rests on the f…	Univ Catholique Louvain, Chaire Hoover Eth Econ & Sociale, B-1348 Louvain, Belgium	Van Parijs, P (corresponding author), Univ Catholique Louvain, Chaire Hoover Eth Econ & Sociale, 3 Pl Montesquieu, B-1348 Louvain, Belgium.						Anderson B.R.O., 1993, OXFORD COMPANION POL, P614; BARNETT RD, 1968, ENCY UNIVERSALIS, V2, P253; BOWLES S, 1998, RECASTING EGALITARIA; Brubaker R., 1992, CITIZENSHIP NATIONHO; CITRON S, 1999, MONDE 0629; Crystal D., 1997, CAMBRIDGE ENCY LANGU; DELBERGHE M, 1999, MONDE 0706; DEPECKER L, 1997, UNIVERSALIA 1997, P111; DESWAAN A, 1993, INT POLIT SCI REV, V14, P241, DOI 10.1177/019251219301400303; DES…	32	39	40	0	8	SAGE PUBLICATIONS LTD	LONDON	6 BONHILL STREET, LONDON EC2A 4PU, ENGLAND	0192-5121			INT POLIT SCI REV	Int. Polit. Sci. Rev.	APR	2000	4	21	2
J	Gottlieb, PD; Fogarty, M				Gottlieb, PD; Fogarty, M			Educational attainment and metropolitan growth	ECONOMIC DEVELOPMENT QUARTERLY			English	Article						human capital; higher education; brain drain; per capita income growth; employment growth	ECONOMIC-DEVELOPMENT; CITIES	This study explores the relationship between educational attainment at the bachelor's degree level and subsequent economic growth in U.S. metropolitan areas. It reviews the theoretical literature in human capital that predicts faster productivity and income growth in cities that have high education levels and numerous opportunities for interaction among skilled workers. In this study, the authors…	Rutgers State Univ, Piscataway, NJ 08855 USA; Portland State Univ, Sch Urban Studies & Planning, Portland, OR 97207 USA	Gottlieb, PD (corresponding author), Rutgers State Univ, Piscataway, NJ 08855 USA.						BARRO RJ, 1992, J POLIT ECON, V100, P223, DOI 10.1086/261816; Beeson P, 1992, SOURCES METROPOLITAN, P19; BENHABIB J, 1994, J MONETARY ECON, V34, P143, DOI 10.1016/0304-3932(94)90047-7; CARLINO G, 1994, 9413 FED RES BANK PH; CARLINO G, 1995, BUSINESS REV FEDERAL, P15; FOGARTY M, 1997, PICKING FUTURE SHOUL; FOGARTY M, 1978, REV REG STUD, V5, P65; FOGARTY M, 1992, M REG SCI ASS CHIC; GAROFALO G, 198…	23	39	39	0	7	SAGE PUBLICATIONS INC	THOUSAND OAKS	2455 TELLER RD, THOUSAND OAKS, CA 91320 USA	0891-2424			ECON DEV Q	Econ. Dev. Q.	NOV	2003	4	17	4
J	Record, R; Mohiddin, A				Record, Richard; Mohiddin, Abdu			An economic perspective on Malawi's medical "brain drain"	GLOBALIZATION AND HEALTH			English	Article								Background: The medical "brain drain" has been described as rich countries "looting" doctors and nurses from developing countries undermining their health systems and public health. However this "brain-drain" might also be seen as a success in the training and "export" of health professionals and the benefits this provides. This paper illustrates the arguments and possible policy options by focus…	[Record, Richard] Minist Ind, Capital City 3, Lilongwe, Malawi; [Mohiddin, Abdu] Kings Coll London, Guys Kings & St Thomas Sch Med, Div Hlth & Social Care Res, London SE1 3QD, England	Record, R (corresponding author), Minist Ind, POB 30366, Capital City 3, Lilongwe, Malawi.	richardrecord@hotmail.com; abdumohiddin@doctors.org.uk					Ahmad OB, 2005, BRIT MED J, V331, P43, DOI 10.1136/bmj.331.7507.43; Amin Mohammed, MIGRATION REMITTANCE; [Anonymous], 2005, DAILY TIMES 0609; [Anonymous], 2005, ECONOMIST 1006; [Anonymous], 2005, WE NEED DIST BRAIN D; [Anonymous], 2006, NEWS ROUND BMJ, V332, P9; [Anonymous], 2005, BMJ, V331, P2; [Anonymous], LOS ANGELES TIMES; [Anonymous], 2002, MAL COR WELF IND QUE; [Anonymous], 2006, DAILY TIME…	39	39	39	0	9	BIOMED CENTRAL LTD	LONDON	236 GRAYS INN RD, FLOOR 6, LONDON WC1X 8HL, ENGLAND	1744-8603			GLOBALIZATION HEALTH	Global. Health		2006	5	2
J	Alonso-Garbayo, A; Maben, J				Alonso-Garbayo, Alvaro; Maben, Jill			Internationally recruited nurses from India and the Philippines in the United Kingdom: the decision to emigrate	HUMAN RESOURCES FOR HEALTH			English	Article							BRAIN-DRAIN; MIGRATION; HEALTH; PROFESSIONALS; WORLD; UK	Background: The United Kingdom has recruited nurses from countries with a reported surplus in their nursing workforce, such as India and the Philippines. However, little is known about the decision to emigrate made by nurses from these countries. One theory suggests that individuals weigh the benefits and costs of migration: the push and pull factors. This paper challenges the restricted economic…	[Maben, Jill] Kings Coll London, Natl Nursing Res Unit, London WC2R 2LS, England; [Alonso-Garbayo, Alvaro] London Sch Hyg & Trop Med, London WC1, England	Maben, J (corresponding author), Kings Coll London, Natl Nursing Res Unit, London WC2R 2LS, England.	alvaro_alonso@yahoo.com; jill.2.maben@kcl.ac.uk	ALONSO-GARBAYO, ALVARO/H-9872-2019; Balasubramanian, Madhan/E-7255-2010	ALONSO-GARBAYO, ALVARO/0000-0002-4120-1541; Maben, Jill/0000-0002-6168-0455			Abraham EJ, 2007, NURS HEALTH SCI, V9, P79, DOI 10.1111/j.1442-2018.2007.00305.x; Allan H., 2003, WE NEED RESPECT EXPE; Allan HT, 2004, DIVERSITY HLTH SOCIA, V1, P117; ALONSOGARBAYO A, 2007, DEP PUBLIC HLTH POLI; Arango J, 2000, INT SOC SCI J, V52, P283, DOI 10.1111/1468-2451.00259; Astor A, 2005, SOC SCI MED, V61, P2492, DOI 10.1016/j.socscimed.2005.05.003; Awases M, 2003, MIGRATION HLTH PROFE; …	65	39	39	0	17	BMC	LONDON	CAMPUS, 4 CRINAN ST, LONDON N1 9XW, ENGLAND	1478-4491			HUM RESOUR HEALTH	Hum. Resour. Health	APR 24	2009	5	7
J	Bettin, G; Zazzaro, A				Bettin, Giulia; Zazzaro, Alberto			REMITTANCES AND FINANCIAL DEVELOPMENT: SUBSTITUTES OR COMPLEMENTS IN ECONOMIC GROWTH?	BULLETIN OF ECONOMIC RESEARCH			English	Article						bank efficiency; economic growth; financial development; migrants' remittances	INTERNATIONAL MIGRATION; EXCHANGE-RATE; BRAIN-DRAIN; INSTITUTIONS; INFLATION; NETWORKS	Recent studies indicate that the effect of migrants' remittances on the economic growth of receiving countries depends negatively on the level of development of the domestic financial sector. In this paper, we introduce a new indicator of financial development to measure the efficiency of the domestic banking system, and find the existence of complementarity between remittances and bank efficienc…	[Bettin, Giulia] Univ Politecn Marche, Dept Econ, I-60121 Ancona, Italy	Bettin, G (corresponding author), Univ Politecn Marche, Dept Econ, Ple Martelli 8, I-60121 Ancona, Italy.	g.bettin@univpm.it					Acemoglu D, 2001, AM ECON REV, V91, P1369, DOI 10.1257/aer.91.5.1369; Acosta P., 2006, POLICY RES WORKING P, V3903; ADELMAN I, 1990, J DEV STUD, V26, P387, DOI 10.1080/00220389008422161; Aggarwal R., 2006, 3957 WBPR WORLD BANK; Ambrosius C., 2008, CAPITALISING R UNPUB; Amuedo-Dorantes C, 2004, WORLD DEV, V32, P1407, DOI 10.1016/j.worlddev.2004.02.004; ARELLANO M, 1995, J ECONOMETRICS, V68, P29, D…	85	39	39	0	27	WILEY	HOBOKEN	111 RIVER ST, HOBOKEN 07030-5774, NJ USA	0307-3378	1467-8586		B ECON RES	Bull Econ. Res.	OCT	2012	5	64	4
J	Remuzzi, G; Benigni, A; Finkelstein, FO; Grunfeld, JP; Joly, D; Katz, I; Liu, ZH; Miyata, T; Perico, N; Rodriguez-Iturbe, B; Antiga, L; Schaefer, F; Schieppati, A; Schrier, RW; Tonelli, M				Remuzzi, Giuseppe; Benigni, Ariela; Finkelstein, Fredric O.; Grunfeld, Jean-Pierre; Joly, Dominique; Katz, Ivor; Liu, Zhi-Hong; Miyata, Toshio; Perico, Norberto; Rodriguez-Iturbe, Bernardo; Antiga, Luca; Schaefer, Franz; Schieppati, Arrigo; Schrier, Robert W.; Tonelli, Marcello			Kidney failure: aims for the next 10 years and barriers to success	LANCET			English	Article							ACUTE PERITONEAL-DIALYSIS; MESENCHYMAL STEM-CELLS; RENAL-DISEASE; CARDIOVASCULAR-DISEASE; DEVELOPING-COUNTRIES; COST-EFFECTIVENESS; PROGENITOR CELLS; DRUG DISCOVERY; BRAIN-DRAIN; HEALTH	Although in some parts of the world acute and chronic kidney diseases are preventable or treatable disorders, in many other regions these diseases are left without any care. The nephrology community needs to commit itself to reduction of this divide between high-income and low-income regions. Moreover, new and exciting developments in fields such as pharmacology, genetic, or bioengineering, can g…	[Remuzzi, Giuseppe; Benigni, Ariela; Perico, Norberto; Schieppati, Arrigo] Ist Ric Farmacol Mario Negri, IRCCS, I-24126 Bergamo, Italy; [Finkelstein, Fredric O.] Yale Univ, New Haven, CT USA; [Grunfeld, Jean-Pierre; Joly, Dominique] Hop Necker Enfants Malad, Paris, France; [Katz, Ivor] St George Hosp, Dept Renal Med, Sydney, Vic, Australia; [Liu, Zhi-Hong] Nanjing Univ Med, Jinling Hosp, Nanjing,…	Remuzzi, G (corresponding author), Ist Ric Farmacol Mario Negri, IRCCS, Ctr Anna Maria Astori, I-24126 Bergamo, Italy.	giuseppe.remuzzi@marionegri.it	Miyata, Toshio/A-4872-2010; Tonelli, Marcello/B-3028-2009; Remuzzi, Giuseppe/V-9766-2017	Tonelli, Marcello/0000-0002-0846-3187; Benigni, Ariela/0000-0002-4721-5485; Perico, Norberto/0000-0002-3147-4327; Remuzzi, Giuseppe/0000-0002-6194-3446			Abbate M, 2006, J AM SOC NEPHROL, V17, P2974, DOI 10.1681/ASN.2006040377; Bamshad MJ, 2011, NAT REV GENET, V12, P745, DOI 10.1038/nrg3031; Barsoum RS, 2006, NEW ENGL J MED, V354, P997, DOI 10.1056/NEJMp058318; Baxter K, 2011, GENET TEST MOL BIOMA, V15, P465, DOI 10.1089/gtmb.2011.1522; Bayliss EA, 2011, CLIN J AM SOC NEPHRO, V6, P704, DOI 10.2215/CJN.06610810; Beaglehole R, 2003, LANCET, V362, P9…	101	39	44	0	38	ELSEVIER SCIENCE INC	NEW YORK	STE 800, 230 PARK AVE, NEW YORK, NY 10169 USA	0140-6736	1474-547X		LANCET	Lancet	46569	2013	5	382	9889
J	Aleksynska, M; Tritah, A				Aleksynska, Mariya; Tritah, Ahmed			Occupation-education mismatch of immigrant workers in Europe: Context and policies	ECONOMICS OF EDUCATION REVIEW			English	Article						Immigration; Occupational mismatch; Overeducation; ORU realized matches; Migration policies	LABOR-MARKET ASSIMILATION; OVER-EDUCATION; SELF-SELECTION; PUBLIC-SCHOOLS; BRAIN-DRAIN; OVEREDUCATION; EARNINGS; MIGRATION; MOBILITY; ECONOMICS	This paper analyses occupational matching of immigrants from over seventy countries of origin to 22 European countries. Using European Social Survey for the years 2002-2009, we show that immigrants are more likely to be both under- and overeducated than the native born for the jobs that they perform. However, immigrants' outcomes converge to those of the native born with the years of labor market…	[Aleksynska, Mariya] CEPII, F-75007 Paris, France; [Tritah, Ahmed] Univ Maine, GAINS TEPP, F-72085 Le Mans 9, France	Aleksynska, M (corresponding author), CEPII, 113 Rue Grenelle, F-75007 Paris, France.	mariya.aleksynska@cepii.fr; ahmed.tritah@univ-lemans.fr					Acemoglu D, 1999, ECON J, V109, pF112; ALBARAMIREZ A, 1993, J HUM RESOUR, V28, P259, DOI 10.2307/146203; Aleksynska M, 2011, EUR J POLIT ECON, V27, P566, DOI 10.1016/j.ejpoleco.2010.12.004; Amuedo-Dorantes C, 2007, BRIT J IND RELAT, V45, P257, DOI 10.1111/j.1467-8543.2007.00614.x; Barrett A, 2008, INT MIGR REV, V42, P597, DOI 10.1111/j.1747-7379.2008.00139.x; Beine M, 2001, J DEV ECON, V64, P275,…	70	39	39	1	43	PERGAMON-ELSEVIER SCIENCE LTD	OXFORD	THE BOULEVARD, LANGFORD LANE, KIDLINGTON, OXFORD OX5 1GB, ENGLAND	0272-7757	1873-7382		ECON EDUC REV	Econ. Educ. Rev.	OCT	2013	5	36
J	Kerr, SP; Kerr, W; Ozden, C; Parsons, C				Kerr, Sari Pekkala; Kerr, William; Oezden, Caglar; Parsons, Christopher			Global Talent Flows	JOURNAL OF ECONOMIC PERSPECTIVES			English	Article							SKILLED IMMIGRATION; RETURN MIGRATION; FOREIGN-BORN; BRAIN-DRAIN; US; INNOVATION; EMIGRATION; ECONOMICS; VISA; PRODUCTIVITY	Highly skilled workers play a central and starring role in today's knowledge economy. Talented individuals make exceptional direct contributions--including breakthrough innovations and scientific discoveries--and coordinate and guide the actions of many others, propelling the knowledge frontier and spurring economic growth. In this process, the mobility of skilled workers becomes critical to enha…	[Kerr, Sari Pekkala] Wellesley Coll, Wellesley Ctr Women, Wellesley, MA 02481 USA; [Kerr, William] Harvard Sch Business, Boston, MA USA; [Kerr, William] Natl Bur Econ Res, Cambridge, MA 02138 USA; [Oezden, Caglar] World Bank Dev Res Grp, Washington, DC USA; [Parsons, Christopher] Univ Western Australia, Econ, Nedlands, WA 6009, Australia; [Parsons, Christopher] Univ Oxford, Int Migrat Inst, Oxfor…	Kerr, SP (corresponding author), Wellesley Coll, Wellesley Ctr Women, Wellesley, MA 02481 USA.	skerr3@wellesley.edu; wkerr@hbs.edu; cozden@worldbank.org; christopher.parsons@uwa.edu.au		Parsons, Christopher/0000-0001-8528-4089	Alfred P. Sloan FoundationAlfred P. Sloan Foundation; Kauffman Foundation; National Science FoundationNational Science Foundation (NSF); Smith Richardson Foundation; Harvard Business School; Knowledge for Change Program; Multidonor Trust Fund for Trade and Development of the World Bank	We are grateful to the editors for detailed feedback and to Zovanga Kone for his assistance with the data work. Our research has been generously supported by the Alfred P. Sloan Foundation, the Kauffman Foundation, the National Science Foundation, the Smith Richardson Foundation, and Harvard Business School. Ozden acknowledges financial support from the Knowledge for Change Program and the Multid…	Agrawal A, 2011, J URBAN ECON, V69, P43, DOI 10.1016/j.jue.2010.06.003; Amir R, 2008, REV ECON STAT, V90, P185, DOI 10.1162/rest.90.1.185; Anderson S., 2013, IMPORTANCE INT STUDE; Arslan C, 2014, 160 OECD; Artuc E, 2015, WORLD DEV, V65, P6, DOI 10.1016/j.worlddev.2014.04.004; Artuc Erhan, EC J IN PRESS; Aydemir A, 2008, CAN J ECON, V41, P1285, DOI 10.1111/j.1540-5982.2008.00504.x; Bandiera O, 201…	90	39	40	6	52	AMER ECONOMIC ASSOC	NASHVILLE	2014 BROADWAY, STE 305, NASHVILLE, TN 37203 USA	0895-3309	1944-7965		J ECON PERSPECT	J. Econ. Perspect.	FAL	2016	6	30	4
J	Ogilvie, L; Mill, JE; Astle, B; Fanning, A; Opare, M				Ogilvie, Linda; Mill, Judy E.; Astle, Barbara; Fanning, Anne; Opare, Mary			The exodus of health professionals from sub-Saharan Africa: balancing human rights and societal needs in the twenty-first century	NURSING INQUIRY			English	Article						healthcare systems; health professionals; human rights; international; migration; sub-Saharan Africa	BRAIN-DRAIN; HUMAN-RESOURCES; TRENDS	Increased international migration of health professionals is weakening healthcare systems in low-income countries, particularly those in sub-Saharan Africa. The migration of nurses, physicians and other health professionals from countries in sub-Saharan Africa poses a major threat to the achievement of health equity in this region. As nurses form the backbone of healthcare systems in many of the …	Univ Alberta, Fac Nursing, Extens Ctr, Edmonton, AB T6G 2T4, Canada; Univ Ghana, Legon, Ghana	Ogilvie, L (corresponding author), Univ Alberta, Fac Nursing, Extens Ctr, 7-50, Edmonton, AB T6G 2T4, Canada.	linda.ogilvie@ualberta.ca					Adepoju A, 2004, CHANGING CONFIGURATI; Aiken LH, 2004, HEALTH AFFAIR, V23, P69, DOI 10.1377/hlthaff.23.3.69; ALKIRE S, 2006, GLOBALIZING MIGRATIO, P100; *AM NURS ASS, 2005, NURS SHORT IMM NURS; ANKOMAH K, 2005, BRAIN DRAIN NOT BAD; ASIS MMB, 2005, UNFPA EXP GROUP M IN; Awases M, 2004, MIGRATION HLTH PROFE; BACH S, INT MIGRATION HLTH W; BAUMANN A, 2004, IMMIGRATION EMIGRATI; BOYD M, 2003, WOMEN MI…	63	38	39	1	16	WILEY	HOBOKEN	111 RIVER ST, HOBOKEN 07030-5774, NJ USA	1320-7881	1440-1800		NURS INQ	Nurs. Inq.	JUN	2007	5	14	2
J	Volk, S; Kohler, T; Pudelko, M				Volk, Stefan; Koehler, Tine; Pudelko, Markus			Brain drain: The cognitive neuroscience of foreign language processing in multinational corporations	JOURNAL OF INTERNATIONAL BUSINESS STUDIES			English	Article						language (language design, silent language, translation); neuroscience; cognition; common corporate language	WORKING-MEMORY; INTERNATIONAL ENTREPRENEURSHIP; INDIVIDUAL-DIFFERENCES; EMOTION REGULATION; SELF-REGULATION; JUDGMENT; PERFORMANCE; REPRESENTATION; PROFICIENCY; ADJUSTMENT	This article adopts a cognitive neuroscience perspective to develop theory about the consequences of foreign language use in organizational settings. In contrast to previous work that has focused on the interpersonal effects of foreign language use, we focus on intra-personal, cognitive processes that affect employee performance. Our model delineates how foreign language processing depletes cogni…	[Volk, Stefan] Univ Sydney, Sch Business, Discipline Int Business, Darlington, NSW 2006, Australia; [Koehler, Tine] Univ Melbourne, Dept Management & Mkt, Parkville, Vic 3052, Australia; [Pudelko, Markus] Univ Tubingen, Sch Business & Econ, Tubingen, Germany	Volk, S (corresponding author), Univ Sydney, Sch Business, Discipline Int Business, Storie Dixson Wing Bldg H10, Darlington, NSW 2006, Australia.	stefan.volk@sydney.edu.au	Kohler, Tine/L-2765-2013	Kohler, Tine/0000-0003-0480-472X			Abutalebi J, 2008, ACTA PSYCHOL, V128, P466, DOI 10.1016/j.actpsy.2008.03.014; Abutalebi J, 2007, J NEUROLINGUIST, V20, P242, DOI 10.1016/j.jneuroling.2006.10.003; Akkermans D, 2010, MANAGE INT REV, V50, P559, DOI 10.1007/s11575-010-0053-0; Alter AL, 2007, J EXP PSYCHOL GEN, V136, P569, DOI 10.1037/0096-3445.136.4.569; Baars BJ, 2003, TRENDS COGN SCI, V7, P166, DOI 10.1016/S1364-6613(03)00056-1; …	102	38	38	3	56	PALGRAVE MACMILLAN LTD	BASINGSTOKE	BRUNEL RD BLDG, HOUNDMILLS, BASINGSTOKE RG21 6XS, HANTS, ENGLAND	0047-2506	1478-6990		J INT BUS STUD	J. Int. Bus. Stud.	SEP	2014	5	45	7
J	Pellegrino, A				Pellegrino, A			Trends in Latin American skilled migration: "Brain drain" or "brain exchange"	INTERNATIONAL MIGRATION			English	Article								During the last half of the twentieth century the Latin American subcontinent, historically a region of immigration, became one of emigration characterized by intra-regional movements and movements towards the developed world, particularly the US. The emigration of highly skilled resources was a new phenomenon in the 1960s and debate on "brain drain" took a significant place in academia and in in…	Univ Republica, Fac Social Sci, Populat Programme, Montevideo, Uruguay	Pellegrino, A (corresponding author), Univ Republica, Fac Social Sci, Populat Programme, Montevideo, Uruguay.						BORJAS GJ, 1994, 4913 NAT BUR EC RES; CARRINGTON W, 1999, FINANC DEV, V36, P1; CARRINGTON WJ, 1998, 98102 INT MON FUND; CHAPARRO F, 1971, UNPUB MIGRACION PROF; CHARUM J, 1998, NUEVO NOMADISMO CIEN; Coleman D.A., 2001, REPLACEMENT MIGRATIO; COLEMAN DA, 2000, UN EXP GROUP M NEW Y; COURGEAU D, 1980, ANAL QUANTITATIVE MI; Gaillard J., 1998, FUTURIBLES, V228, P25; HOROWITZ MA, 1962, EMIGRACION TECNICO…	34	37	41	1	12	INT ORGANIZATION MIGRATION	GENEVA 19	PO BOX 71, CH-1211 GENEVA 19, SWITZERLAND	0020-7985			INT MIGR	Int. Migr.		2001	4	39	5
J	Fan, CS; Stark, O				Fan, C. Simon; Stark, Oded			International migration and "educated unemployment"	JOURNAL OF DEVELOPMENT ECONOMICS			English	Article						international migration; human capital formation; "educated unemployment"; beneficial brain drain	HUMAN-CAPITAL FORMATION; BRAIN-DRAIN; EARNINGS	This paper provides a novel explanation of "educated unemployment", which is a salient feature of the labor markets in a number of developing countries. In a simple job-search framework we show that "educated unemployment" is caused by the prospect of international migration, that is, by the possibility of a "brain drain". In addition, the analysis shows that a developing country may end up with …	Univ Bonn, ZEF, D-53113 Bonn, Germany; Lingnan Univ, Hong Kong, Hong Kong, Peoples R China; Univ Klagenfurt, Klagenfurt, Austria; Univ Vienna, A-1010 Vienna, Austria; Univ Warsaw, PL-00325 Warsaw, Poland; ESCE Econ & Social Res Ctr, Cologne, Germany; ESCE Econ & Social Res Ctr, Eisenstadt, Austria	Stark, O (corresponding author), Univ Bonn, ZEF, Walter Flex Str 3, D-53113 Bonn, Germany.	ostark@uni-bonn.de		Fan, Simon/0000-0003-0955-5523			Acemoglu D, 1999, J POLIT ECON, V107, P893, DOI 10.1086/250084; ASHENFELTER O, 1979, J POLIT ECON, V87, pS99, DOI 10.1086/260824; Bhagwati J., 1974, J DEV ECON, V1, P19, DOI DOI 10.1016/0304-3878(74)90020-0; Bhagwati J.N., 1989, INCOME TAXATION INT; Boudarbat B., 2004, EMPLOYMENT SECTOR CH; GILLIS M, 1996, EC DEV; KING AM, 1987, MIGRATION TALENT CAU; MATHEW ET, 1997, EMPLOYMENT UNEMPLOYM; Mortens…	19	37	38	0	13	ELSEVIER SCIENCE BV	AMSTERDAM	PO BOX 211, 1000 AE AMSTERDAM, NETHERLANDS	0304-3878			J DEV ECON	J. Dev. Econ.	MAY	2007	5	83	1
J	Chankova, S; Muchiri, S; Kombe, G				Chankova, Slavea; Muchiri, Stephen; Kombe, Gilbert			Health workforce attrition in the public sector in Kenya: a look at the reasons	HUMAN RESOURCES FOR HEALTH			English	Article							SUB-SAHARAN AFRICA; BRAIN-DRAIN; PROFESSIONALS	Background: Kenya, like many other countries in sub-Saharan Africa, has been affected by shortages of health workers in the public sector. Data on the rates and leading reasons for health workers attrition in the public sector are key in developing effective, evidence-based planning and policy on human resources for health. Methods: This study analysed data from a human resources health facility …	[Chankova, Slavea; Kombe, Gilbert] ABT Associates Inc, Int Hlth Div, Bethesda, MD USA; [Muchiri, Stephen] Minist State Planning Natl Dev & Vis 2030, Nairobi, Kenya	Chankova, S (corresponding author), ABT Associates Inc, Int Hlth Div, Bethesda, MD USA.	slavea_chankova@abtassoc.com; stephen_muchiri@yahoo.com; gilbert_kombe@abtassoc.com					Chankova S, 2006, SITUATION ASSESSMENT; CHANKOVA S, 2006, RISING CHALLENGES HU; Chen L, 2004, LANCET, V364, P1984, DOI 10.1016/S0140-6736(04)17482-5; Connell J, 2007, SOC SCI MED, V64, P1876, DOI 10.1016/j.socscimed.2006.12.013; Dovlo D, 2005, HUMAN RESOURCES HLTH, V3; Dovlo D, 2004, HUM RESOUR HEALTH, V2, P7, DOI DOI 10.1186/1478-4491-2-7; Eastwood JB, 2005, LANCET, V365, P1893, DOI 10.1016/S014…	26	37	37	3	11	BMC	LONDON	CAMPUS, 4 CRINAN ST, LONDON N1 9XW, ENGLAND		1478-4491		HUM RESOUR HEALTH	Hum. Resour. Health	44378	2009	5	7
J	Kasper, J; Bajunirwe, F				Kasper, Jennifer; Bajunirwe, Francis			Brain drain in sub-Saharan Africa: contributing factors, potential remedies and the role of academic medical centres	ARCHIVES OF DISEASE IN CHILDHOOD			English	Article							HEALTH WORKFORCE; GLOBAL HEALTH; CARE; MIGRATION; EDUCATION; PROFESSIONALS; ETHIOPIA; DOCTORS; IMBALANCES; PHYSICIANS	A double jeopardy exists in resource-limited settings (RLS) in sub-Saharan Africa (SSA): there are a disproportionately greater number of acutely ill patients, but a paucity of healthcare workers (HCW) to care for them. SSA has 25% of the global disease burden but only 3% of the world's HCW. Thirty-two SSA countries do not meet the WHO minimum of 23 HCW per 10000 population. Contributing factors …	[Kasper, Jennifer] Harvard Univ, Sch Med, Div Global Hlth, Massachusetts Gen Hosp Children, Boston, MA 02114 USA; [Bajunirwe, Francis] Mbarara Univ Sci & Technol, Dept Community Hlth, Mbarara, Uganda	Kasper, J (corresponding author), Harvard Univ, Sch Med, Div Global Hlth, Massachusetts Gen Hosp Children, 100 Cambridge St,15th Floor, Boston, MA 02114 USA.	jkasper1@partners.org					Alem A, 2010, ACAD PSYCHIATR, V34, P424, DOI 10.1176/appi.ap.34.6.424; Anderson FWJ, 2007, OBSTET GYNECOL, V110, P1012, DOI 10.1097/01.AOG.0000287064.63051.1c; [Anonymous], 2011, WILL WE ACHIEVE UNIV; [Anonymous], DIVISION GLOBAL PSYC; [Anonymous], CAS STUD CAM COL JOR; [Anonymous], 2007, INT MIGR OUTL; [Anonymous], WORLD HLTH REPORT 20; Assefa Y, 2012, J HEALTH SERV RES PO, V17, P24, DOI 10.1258…	94	37	37	2	40	BMJ PUBLISHING GROUP	LONDON	BRITISH MED ASSOC HOUSE, TAVISTOCK SQUARE, LONDON WC1H 9JR, ENGLAND	0003-9888			ARCH DIS CHILD	Arch. Dis. Child.	NOV	2012	5	97	11
J	Miguelez, E; Moreno, R				Miguelez, Ernest; Moreno, Rosina			WHAT ATTRACTS KNOWLEDGE WORKERS? THE ROLE OF SPACE AND SOCIAL NETWORKS	JOURNAL OF REGIONAL SCIENCE			English	Article							ECONOMIC-GEOGRAPHY; GRAVITY MODEL; UNITED-STATES; SMART CITIES; BRAIN-DRAIN; MIGRATION; JOBS; MOBILITY; AMENITIES; QUALITY	The aim of this paper is to identify the determinants of the geographical mobility of skilled individuals, such as inventors, across European regions. Among a large number of variables, we focus on the role of social proximity between inventors' communities. We use a control function approach to address the endogenous nature of networks, and zero-inflated negative binomial models to accommodate o…	[Miguelez, Ernest] World Intellectual Property Org, Econ & Stat Div, CH-1211 Geneva 20, Switzerland; [Miguelez, Ernest] Univ Barcelona, AQR IREA, Barcelona 08034, Spain; [Moreno, Rosina] Univ Barcelona, AQR IREA, Dept Econometr Stat & Spanish Econ, Barcelona 08034, Spain	Miguelez, E (corresponding author), World Intellectual Property Org, Econ & Stat Div, 34 Chemin Colombettes, CH-1211 Geneva 20, Switzerland.	ernestmiguelez@gmail.com; rmoreno@ub.edu	Moreno, Rosina/D-4723-2014; Miguelez, Ernest/A-1254-2017	Moreno, Rosina/0000-0002-3500-8622; Miguelez, Ernest/0000-0002-8224-6842			Achen CH, 2001, ANN M POL METH SECT; Ackers L, 2008, MOVING PEOPLE AND KNOWLEDGE: SCIENTIFIC MOBILITY IN AN ENLARGING EUROPEAN UNION, P1; ANDERSON MA, 2004, 200405A US INT TRAD; ANJOMANI A, 1992, J POPUL ECON, V5, P87, DOI 10.1007/BF00168269; Azoulay Pierre, 2012, RATE DIRECTION INVEN, P107; Biagi B, 2011, SPAT ECON ANAL, V6, P111, DOI 10.1080/17421772.2010.540035; Borjas G., 2000, INT ENCY SOCIA…	93	37	37	0	65	WILEY	HOBOKEN	111 RIVER ST, HOBOKEN 07030-5774, NJ USA	0022-4146	1467-9787		J REGIONAL SCI	J. Reg. Sci.	JAN	2014	5	54	1
J	Ciriaci, D				Ciriaci, Daria			Does University Quality Influence the Interregional Mobility of Students and Graduates? The Case of Italy	REGIONAL STUDIES			English	Article						Brain drain; Labour mobility; University quality; Regional economic disparities	LABOR MOBILITY; BRAIN-DRAIN; MIGRATION; RETURN; KNOWLEDGE; EDUCATION; GROWTH; CITIES; IMPACT; FLOWS	Regional Studies. This paper analyses the role that university quality holds, among other socio-economic factors, in the sequential migration behaviour of Italian students and graduates. Regardless of the recognition of universities as key drivers of economic development, empirical evidence on the effects of their quality on the attraction and retention of students and graduates is still limited,…	Commiss European Communities, Joint Res Ctr, Inst Prospect Technol Studies, E-41092 Seville, Spain	Ciriaci, D (corresponding author), Commiss European Communities, Joint Res Ctr, Inst Prospect Technol Studies, C Inca Garcilaso S-N, E-41092 Seville, Spain.	daria.ciriaci@ec.europa.eu					AMEMIYA T, 1978, ECONOMETRICA, V46, P1193, DOI 10.2307/1911443; ARMSTRONG HW, 1993, URBAN STUD, V30, P1653, DOI 10.1080/00420989320081641; [ASSOCIAZIONE PER LO SVILUPPO DELL'INDUSTRIA NEL MEZZOGIORNO SVIMEZ], 2010, RAPP SVIM 2009; Bacci S, 2008, STATISTICA, V68, P255; BARYLA E. A., 2001, ED EC, V9; Becker G. S., 1964, HUMAN CAPITAL; Beine M, 2001, J DEV ECON, V64, P275, DOI 10.1016/S0304-3878(00)…	64	37	39	0	21	ROUTLEDGE JOURNALS, TAYLOR & FRANCIS LTD	ABINGDON	2-4 PARK SQUARE, MILTON PARK, ABINGDON OX14 4RN, OXON, ENGLAND	0034-3404	1360-0591		REG STUD	Reg. Stud.		2014	5	48	10
J	Akl, EA; Maroun, N; Major, S; Afif, C; Chahoud, B; Choucair, J; Sakr, M; Schunemann, HJ				Akl, Elie A.; Maroun, Nancy; Major, Stella; Afif, Claude; Chahoud, Bechara; Choucair, Jacques; Sakr, Mazen; Schunemann, Holger J.			Why are you draining your brain? Factors underlying decisions of graduating Lebanese medical students to migrate	SOCIAL SCIENCE & MEDICINE			English	Article						Lebanon; Middle East; brain drain; migration; physicians; medical students	PHYSICIANS	In the context of a worldwide physician brain drain phenomenon, Lebanon has the highest emigration factor in the Middle East and North Africa. In this manuscript we aim to identify and develop a conceptual framework for the factors underlying the decisions of graduating Lebanese medical students to train abroad. We conducted two focus groups and seven semi-structured individual interviews with 23…	SUNY Buffalo, Dept Med, Buffalo, NY 14215 USA; Amer Univ Beirut, Beirut, Lebanon; Lebanese Univ, Beirut, Lebanon; SUNY Buffalo, Dept Sociol, Buffalo, NY 14215 USA; Univ St Joseph, Beirut, Lebanon; Beirut Arab Univ, Beirut, Lebanon	Akl, EA (corresponding author), SUNY Buffalo, Dept Med, ECMC CC-142,462 Grider St, Buffalo, NY 14215 USA.	elieakl@buffalo.edu; nmaroun@buffalo.edu; sm09@aub.edu.lb; claude.afif@balamand.edu; becharachahoud23@hotmail.com; jacqueschoucair@hotmail.com; drmasakr@hotmail.com; hjs@buffalo.edu	Akl, Elie/K-5269-2019; Choucair, J/AAV-2679-2020; Akl, Elie A/R-2079-2016	Akl, Elie A/0000-0002-3444-8618; Maroun, Nancy/0000-0002-7317-3231			AKL EA, UNPUB GRADUATES LEBA; Brown RPC, 2004, SOC SCI MED, V58, P2193, DOI 10.1016/j.socscimed.2003.08.020; Cooper RA, 2004, ANN INTERN MED, V141, P705, DOI 10.7326/0003-4819-141-9-200411020-00012; Hagopian A, 2005, SOC SCI MED, V61, P1750, DOI 10.1016/j.socscimed.2005.03.027; HILARY J, 2001, WRONG MODEL GATS TRA; KRONFOL NM, 1992, MED CARE, V30, P208, DOI 10.1097/00005650-199203000-00003; LEE E…	13	36	36	0	10	PERGAMON-ELSEVIER SCIENCE LTD	OXFORD	THE BOULEVARD, LANGFORD LANE, KIDLINGTON, OXFORD OX5 1GB, ENGLAND	0277-9536			SOC SCI MED	Soc. Sci. Med.	MAR	2007	5	64	6
J	Docquier, F; Faye, O; Pestieau, P				Docquier, Frederic; Faye, Ousmane; Pestieau, Pierre			Is migration a good substitute for education subsidies?	JOURNAL OF DEVELOPMENT ECONOMICS			English	Article; Proceedings Paper	Seminar of the Centre-for-New-and-Emerging-Markets (CNEM)	NOV, 2005	London Business Sch, London, ENGLAND	Ctr New & Emerging Markets	London Business Sch	brain drain; human capital; immigration policy; development	HUMAN-CAPITAL FORMATION; ECONOMIC-GROWTH; BRAIN-DRAIN; POPULATION	Assuming a given educational policy, the recent brain drain literature reveals that skilled migration can boost the average level of schooling in developing countries. In this paper, we introduce educational subsidies determined by governments concerned by the number of skilled workers remaining in the country. Our theoretical analysis shows that developing countries can benefit from skilled emig…	[Docquier, Frederic] Catholic Univ Louvain, IRES, B-1348 Louvain, Belgium; [Faye, Ousmane; Pestieau, Pierre] Univ Liege, CREPP, B-4000 Liege, Belgium; [Faye, Ousmane] APHRC, Nairobi, Kenya; [Pestieau, Pierre] Catholic Univ Louvain, CORE, B-1348 Louvain, Belgium; [Pestieau, Pierre] PSE, Paris, France	Docquier, F (corresponding author), Catholic Univ Louvain, IRES, 3 Pl Montesquieu, B-1348 Louvain, Belgium.	frederic.docquier@uclouvain.be					Barro R. J., 1995, EC GROWTH; Batista Catia, 2007, BRAIN DRAIN BRAIN GA; Becker GS, 1999, AM ECON REV, V89, P145, DOI 10.1257/aer.89.2.145; Beine M, 2001, J DEV ECON, V64, P275, DOI 10.1016/S0304-3878(00)00133-4; BEINE M, IN PRESS EC J; Beine M, 2007, WORLD BANK ECON REV, V21, P249, DOI 10.1093/wber/lhm007; COMMANDER S, 2004, 1422 IZA IND SOFTW I; DOCQUIER F, 2006, INT MIGRATION REMITT, pCH5; Gal…	20	36	36	0	15	ELSEVIER SCIENCE BV	AMSTERDAM	PO BOX 211, 1000 AE AMSTERDAM, NETHERLANDS	0304-3878			J DEV ECON	J. Dev. Econ.	JUN	2008	5	86	2
J	Hooper, CR				Hooper, C. R.			Adding insult to injury: the healthcare brain drain	JOURNAL OF MEDICAL ETHICS			English	Article							MEDICAL MIGRATION; POOR COUNTRIES	Recent reports published by the United Nations and the World Health Organization suggest that the brain drain of healthcare professionals from the developing to the developed world is decimating the provision of healthcare in poor countries. The migration of these key workers is driven by a combination of economic inequalities and the recruitment policies of governments in the rich world. This ar…	UCL, Dept Philosophy, London WC1E 6BT, England	Hooper, CR (corresponding author), UCL, Dept Philosophy, Mortimer St, London WC1E 6BT, England.	hoopercarwyn@googlemail.com		Hooper, Carwyn/0000-0001-5147-3842			Adams O., 1998, PUBLIC HLTH PERSPECT; Ahmad OB, 2005, BRIT MED J, V331, P43, DOI 10.1136/bmj.331.7507.43; [Anonymous], 2007, LEAST DEV COUNTR REP; BACH S, 2003, INT MIGR HLTH WORK L; BALAKRISHNAN A, 2007, GUARDIAN WEEKLY 0803, P41; BIRDSALL N, 2006, QUESTION ANSWER N BI; Buchan J., 2003, INT NURSE MOBILITY T; Bundred PE, 2000, LANCET, V356, P245, DOI 10.1016/S0140-6736(00)02492-2; Couper I, 2002,…	22	36	36	0	3	B M J PUBLISHING GROUP	LONDON	BRITISH MED ASSOC HOUSE, TAVISTOCK SQUARE, LONDON WC1H 9JR, ENGLAND	0306-6800			J MED ETHICS	J. Med. Ethics	SEP	2008	5	34	9
J	Alem, A; Pain, C; Araya, M; Hodges, BD				Alem, Atalay; Pain, Clare; Araya, Mesfin; Hodges, Brian D.			Co-Creating a Psychiatric Resident Program with Ethiopians, for Ethiopians, in Ethiopia: The Toronto Addis Ababa Psychiatry Project (TAAPP)	ACADEMIC PSYCHIATRY			English	Article							MEDICAL-EDUCATION	Background: Globalization in medical education often means a "brain drain" of desperately needed health professionals from low-to high-income countries. Despite the best intentions, partnerships that simply transport students to Western medical schools for training have shockingly low return rates. Ethiopia, for example, has sent hundreds of physicians abroad for specialty training over the past …	[Alem, Atalay; Araya, Mesfin] Univ Addis Ababa, Dept Psychiat, Addis Ababa, Ethiopia; [Alem, Atalay] Univ Addis Ababa, Coll Hlth Sci, Addis Ababa, Ethiopia; [Alem, Atalay; Pain, Clare; Araya, Mesfin; Hodges, Brian D.] Univ Toronto, Dept Psychiat, Toronto, ON M5S 1A1, Canada; [Pain, Clare] Univ Toronto, Toronto Addis Ababa Psychiat Project, Toronto, ON M5S 1A1, Canada; [Hodges, Brian D.] Univ Toro…	Pain, C (corresponding author), Toronto Gen Hosp, Wilson Ctr Res Educ, 200 Elizabeth St,Suite 1ES565, Toronto, ON M5G 2C4, Canada.	cpain@mtsinai.on.ca	Pain, Clare/N-9182-2016				Alem Atalay, 2004, Int Psychiatry, V1, P8; Battiste M, 2005, TEACHING ACTIVISM EQ, P121; Bekele YY, 2009, PSYCHOL MED, V39, P475, DOI 10.1017/S0033291708003929; Belkin GS, 2005, ACAD PSYCHIATR, V29, P240, DOI 10.1176/appi.ap.29.3.240; BERHAN Y, 2008, ETHIOPIAN MED J, V46, P23; Central Intelligence Agency, 2009, WORLD FACTB; ELGUEBALY N, 2004, INT PSYCHIAT, V6, P13; Epstein RM, 2007, NEW ENGL J ME…	19	36	36	0	18	AMER PSYCHIATRIC PUBLISHING, INC	ARLINGTON	1000 WILSON BOULEVARD, STE 1825, ARLINGTON, VA 22209-3901 USA	1042-9670			ACAD PSYCHIATR	Acad. Psych.	NOV-DEC	2010	5	34	6
J	Hagander, LE; Hughes, CD; Nash, K; Ganjawalla, K; Linden, A; Martins, Y; Casey, KM; Meara, JG				Hagander, Lars E.; Hughes, Christopher D.; Nash, Katherine; Ganjawalla, Karan; Linden, Allison; Martins, Yolanda; Casey, Kathleen M.; Meara, John G.			Surgeon Migration Between Developing Countries and the United States: Train, Retain, and Gain from Brain Drain	WORLD JOURNAL OF SURGERY			English	Article							PHYSICIAN MIGRATION; SURGICAL WORKFORCE; MEDICAL-STUDENTS; METRICS; POOR; PROFESSIONALS; GLOBALIZATION; CODE	The critical shortage of surgeons in many low- and middle-income countries (LMICs) prevents adequate responses to surgical needs, but the factors that affect surgeon migration have remained incompletely understood. The goal of this study was to examine the importance of personal, professional, and infrastructural factors on surgeon migration from LMICs to the United States. We hypothesized that t…	[Hagander, Lars E.; Hughes, Christopher D.; Ganjawalla, Karan; Linden, Allison; Meara, John G.] Harvard Univ, Sch Med, Program Global Surg & Social Change, Boston, MA 02115 USA; [Hagander, Lars E.; Hughes, Christopher D.; Ganjawalla, Karan; Linden, Allison; Meara, John G.] Childrens Hosp, Dept Plast & Oral Surg, Boston, MA 02115 USA; [Hagander, Lars E.] Lund Univ, Fac Med, Dept Pediat Surg, Lund,…	Hagander, LE (corresponding author), Harvard Univ, Sch Med, Program Global Surg & Social Change, Boston, MA 02115 USA.	lars.hagander@childrens.harvard.edu; john.meara@childrens.harvard.edu		Martins, Yolanda/0000-0002-3983-3531; Meara, John G./0000-0003-4369-3209			Achieving the Health- Related MDGs, 2011, ACHIEVING HLTH RELAT; Ahmad OB, 2005, BRIT MED J, V331, P43, DOI 10.1136/bmj.331.7507.43; Akl EA, 2007, SOC SCI MED, V64, P1278, DOI 10.1016/j.socscimed.2006.10.021; Ameh EA, 2006, J PEDIATR SURG, V41, P542, DOI 10.1016/j.jpedsurg.2005.11.053; Anderson FWJ, 2007, OBSTET GYNECOL, V110, P1012, DOI 10.1097/01.AOG.0000287064.63051.1c; [Anonymous], 2008, HLTH …	64	35	36	1	13	SPRINGER	NEW YORK	233 SPRING ST, NEW YORK, NY 10013 USA	0364-2313	1432-2323		WORLD J SURG	World J.Surg.	JAN	2013	5	37	1
J	Rerat, P				Rerat, Patrick			The selective migration of young graduates: Which of them return to their rural home region and which do not?	JOURNAL OF RURAL STUDIES			English	Article						Graduate migration; Internal migration; Life course; Rural region; Brain drain	SOUTH-EAST ENGLAND; YOUTH MIGRATION; NETHERLANDS; MOBILITY	This paper addresses the migration behaviours of young university graduates from a rural region in Switzerland. Based on a questionnaire survey, it compares graduates' current place of residence (i.e. whether or not they returned to their home region) with characteristics related to their socio-familial, migration and professional trajectories. The propensity to return varies not only according t…	[Rerat, Patrick] Univ Neuchatel, Inst Geog, CH-2000 Neuchatel, Switzerland; [Rerat, Patrick] Univ Lausanne, Inst Geog & Sustainabil, CH-1015 Lausanne, Switzerland	Rerat, P (corresponding author), Univ Neuchatel, Inst Geog, Espace Louis Agassiz 1, CH-2000 Neuchatel, Switzerland.	Patrick.rerat@unine.ch					Baron M., 2006, ESP GEOGR, V1, P44; Belfield C., 1999, HIGH ED Q, V53, P240, DOI DOI 10.1111/1468-2273.00129; Bjarnason T, 2006, J RURAL STUD, V22, P290, DOI 10.1016/j.jrurstud.2005.09.004; Bourdieu P., 1977, REPROD ED SOC CULTUR; Boyle P., 1998, EXPLORING CONT MIGRA; Caro P., 2006, ESP GEOGR, V35, P223; Corbett M, 2007, J RURAL STUD, V23, P430, DOI 10.1016/j.jrurstud.2006.12.001; Corcoran J, 201…	45	35	35	2	43	PERGAMON-ELSEVIER SCIENCE LTD	OXFORD	THE BOULEVARD, LANGFORD LANE, KIDLINGTON, OXFORD OX5 1GB, ENGLAND	0743-0167			J RURAL STUD	J. Rural Stud.	JUL	2014	5	35
J	Aguinis, H; Bradley, KJ; Brodersen, A				Aguinis, Herman; Bradley, Kyle J.; Brodersen, Apryl			Industrial-Organizational Psychologists in Business Schools: Brain Drain or Eye Opener?	INDUSTRIAL AND ORGANIZATIONAL PSYCHOLOGY-PERSPECTIVES ON SCIENCE AND PRACTICE			English	Article							PERFORMANCE; PEOPLE; WORK	We conducted a quantitative and a qualitative study to assess the extent to which industrial and organizational (I-O) psychology has moved to business schools, understand the nature of this move, and offer a balanced discussion of positive and negative consequences of this phenomenon. In quantitative Study 1, we provide evidence that I-O psychologists affiliated with business schools currently co…	[Aguinis, Herman; Bradley, Kyle J.] Indiana Univ, Bloomington, IN 47405 USA; [Brodersen, Apryl] Metropolitan State Univ Denver, Denver, CO USA	Aguinis, H (corresponding author), Indiana Univ, Kelley Sch Business, Dept Management & Entrepreneurship, 1309 E 10th St, Bloomington, IN 47405 USA.	haguinis@indiana.edu	Aguinis, Herman/M-2918-2014	Aguinis, Herman/0000-0002-3485-9484			Aguinis H., 2003, 18 ANN C SOC IND ORG; Aguinis H, 2014, ANNU REV ORGAN PSYCH, V1, P569, DOI 10.1146/annurev-orgpsych-031413-091231; Aguinis H, 2013, BUS HORIZONS, V56, P241, DOI 10.1016/j.bushor.2012.11.007; Becker WJ, 2011, J APPL PSYCHOL, V96, P233, DOI 10.1037/a0021223; CAMPBELL JP, 1971, PROF PSYCHOL, V2, P6; Costanza DP, 2010, IND ORGAN PSYCHOL-US, V3, P281, DOI 10.1111/j.1754-9434.2010.012…	36	35	35	0	13	CAMBRIDGE UNIV PRESS	NEW YORK	32 AVENUE OF THE AMERICAS, NEW YORK, NY 10013-2473 USA	1754-9426	1754-9434		IND ORGAN PSYCHOL-US	Ind. Organ. Psychol.	SEP	2014	5	7	3
J	Liu, Y; Shen, JF				Liu, Ye; Shen, Jianfa			Spatial patterns and determinants of skilled internal migration in China, 2000-2005	PAPERS IN REGIONAL SCIENCE			English	Article						Skilled migration; amenities; gravity model; zero-inflated negative; binomial model; China	INTERPROVINCIAL MIGRATION; REGIONAL-DEVELOPMENT; ECONOMIC-OPPORTUNITY; LABOR MIGRATION; URBAN MIGRATION; CREATIVE CLASS; GRAVITY MODEL; UNITED-STATES; POPULATION; AMENITIES	This paper examines the spatial patterns and determinants of China's interprovincial skilled migration by using data from 2005 one per cent population sample survey. While the coastal region benefits from the influx of skilled labour, the rest of China suffers from severe brain drain. Estimates from zero-inflated negative binomial gravity models indicate that employment opportunities, especially …	[Liu, Ye; Shen, Jianfa] Chinese Univ Hong Kong, Dept Geog & Resource Management, Shatin, Hong Kong, Peoples R China	Liu, Y (corresponding author), Chinese Univ Hong Kong, Dept Geog & Resource Management, Shatin, Hong Kong, Peoples R China.	liuye@cuhk.edu.hk; jianfa@cuhk.edu.hk	Ye, Liu/J-2787-2019	Ye, Liu/0000-0003-2511-5413; Shen, Jianfa/0000-0003-4110-0561			Arntz M, 2010, REG STUD, V44, P423, DOI 10.1080/00343400802663532; Beaverstock JV, 1996, INT J URBAN REGIONAL, V20, P422; Biagi B, 2011, SPAT ECON ANAL, V6, P111, DOI 10.1080/17421772.2010.540035; Burger M, 2009, SPAT ECON ANAL, V4, P167, DOI 10.1080/17421770902834327; Cai F, 2003, CHINA REV, V3, P73; Cai F, 2009, EURASIAN GEOGR ECON, V50, P513, DOI 10.2747/1539-7216.50.5.513; Chan K W, 1999, Int…	88	35	38	1	60	WILEY	HOBOKEN	111 RIVER ST, HOBOKEN 07030-5774, NJ USA	1056-8190	1435-5957		PAP REG SCI	Pap. Reg. Sci.	NOV	2014	5	93	4
J	Zweig, D				Zweig, D			To return or not to return? Politics vs. economics in China's brain drain	STUDIES IN COMPARATIVE INTERNATIONAL DEVELOPMENT			English	Article								This study, based on 273 face-to-face interviews with students, scholars, and former residents of China in the United States in 1993, uses both qualitative and quantitative methods to explain people's views about returning to China. Although less than 9 percent of interviewees had concrete plans to return, over 32 percent were positively disposed to returning in the future. Key background variabl…		Zweig, D (corresponding author), HONG KONG UNIV SCI & TECHNOL,DIV SOCIAL SCI,CLEAR WATER BAY,KOWLOON,HONG KONG.						CHANG P, 1992, STUD COMP INT DEV, V17, P44; CHANG SL, 1992, STUD COMP INT DEV, V27, P27, DOI 10.1007/BF02687103; CHEN C, 1993, ANN M ASS AS STUD LO; ELSAATI S, 1979, P 2 EUR AR SOC RES G; GLASER W, 1978, BRAIN DRAIN EMIGRATI; GU WQ, 1990, UNPUB CHINESE STUDEN; HUANG WC, 1988, ECON EDUC REV, V7, P231; HYAHOE R, 1984, COMP EDUC, V20, P2; KAO CHC, 1971, BRAIN DRAIN CASE STU; KING R, 1988, CHRONICLE …	22	34	34	0	16	TRANSACTION PERIOD CONSORTIUM	NEW BRUNSWICK	DEPT 3091 RUTGERS-THE STATE UNIV OF NJ, NEW BRUNSWICK, NJ 08903	0039-3606			STUD COMP INT DEV	Stud. Comp. Int. Dev.	SPR	1997	4	32	1
J	Ouaked, S				Ouaked, S			Transatlantic roundtable on high-skilled migration and sending countries issues	INTERNATIONAL MIGRATION			English	Article								Globalization and the advent of the knowledge economy have created a new context where there is a greater demand for the highly skilled, especially in the information technology (IT) industry. High-skilled migration has become increasingly more complex, even if in recent years the term "brain drain" has become a generic reference to "high-skilled migration" of all types. It has also become clear …	Georgetown Univ, Inst Study Int Migrat, Washington, DC 20057 USA	Ouaked, S (corresponding author), Georgetown Univ, Inst Study Int Migrat, Washington, DC 20057 USA.							0	34	34	0	7	INT ORGANIZATION MIGRATION	GENEVA 19	PO BOX 71, CH-1211 GENEVA 19, SWITZERLAND	0020-7985			INT MIGR	Int. Migr.		2002	4	40	4
J	Hansen, SB; Ban, C; Huggins, L				Hansen, SB; Ban, C; Huggins, L			Explaining the "brain drain" from older industrial cities: The Pittsburgh region	ECONOMIC DEVELOPMENT QUARTERLY			English	Article						human capital; brain drain; migration; Pittsburgh; labor force		In an effort to understand why so many college graduates are leaving western Pennsylvania, recent college graduates from three Pittsburgh-area universities were surveyed about their career and location decisions. The results indicated some increase in those staying between 1994 and 1999. A logistic regression analysis showed that an improving economy, low housing costs, and ample opportunities fo…	Univ Pittsburgh, Grad Sch Publ & Int Affairs, Pittsburgh, PA 15260 USA	Hansen, SB (corresponding author), Univ Pittsburgh, Grad Sch Publ & Int Affairs, Pittsburgh, PA 15260 USA.						BRIEHM C, 2001, PITTSBURGH EC Q SUM, P1; BRIEHM C, 2000, PITTSBURGH POST 0625, pE1; CHAMBERS E, 1998, MCKINSEY Q, V3, P44, DOI DOI 10.4018/JSKD.2010070103; Cherry Todd, 2001, J REGIONAL ANAL POLI, V31, P23; DRUCKER PF, 1993, POST CAPITALIST SOC; Dumond JM, 1999, ECON INQ, V37, P577, DOI 10.1111/j.1465-7295.1999.tb01449.x; DUNHAM K, 2001, WALL STREET J 0703, P24; EBERTS RW, 1994, EC REV FEDERAL RE…	25	34	35	0	13	SAGE PUBLICATIONS INC	THOUSAND OAKS	2455 TELLER RD, THOUSAND OAKS, CA 91320 USA	0891-2424	1552-3543		ECON DEV Q	Econ. Dev. Q.	MAY	2003	4	17	2
J	Cao, L; Hirschi, A; Deller, J				Cao, Lan; Hirschi, Andreas; Deller, Juergen			Perceived organizational support and intention to stay in host countries among self-initiated expatriates: the role of career satisfaction and networks	INTERNATIONAL JOURNAL OF HUMAN RESOURCE MANAGEMENT			English	Article						perceived organizational support; transnational network; self-initiated expatriate; intention to stay; career network; career satisfaction; global mobility	JOB-PERFORMANCE; BRAIN-DRAIN; SUCCESS; EXPERIENCES; ADJUSTMENT; WORK; REPATRIATION; ASSIGNMENTS; PREDICTORS; COMMITMENT	Previous literature on self-initiated expatriates (SIEs) has mostly focused on an individual perspective and rarely on SIEs in an organizational context. This paper examines the effect of perceived organizational support (POS) on SIE employees' intention to stay in the host country, mediated by career satisfaction and moderated by career networks of host and home country nationals. Data from 112 …	[Cao, Lan; Deller, Juergen] Univ Luneburg, Inst Strateg HR Management Res & Dev, D-21335 Luneburg, Germany; [Hirschi, Andreas] Univ Lausanne, Inst Psychol, Lausanne, Switzerland	Cao, L (corresponding author), Univ Luneburg, Inst Strateg HR Management Res & Dev, D-21335 Luneburg, Germany.	lan.cao@leuphana.de	Cao, Lan/AAW-5614-2020; Deller, Jurgen/A-7638-2008; Hirschi, Andreas/E-4858-2011	Hirschi, Andreas/0000-0001-8766-3314			Aiken L. S, 1991, MULTIPLE REGRESSION; AJZEN I, 1991, ORGAN BEHAV HUM DEC, V50, P179, DOI 10.1016/0749-5978(91)90020-T; Allen DG, 2003, J MANAGE, V29, P99, DOI 10.1016/S0149-2063(02)00222-2; Allen DG, 1999, HUM RESOUR MANAGE R, V9, P525, DOI 10.1016/S1053-4822(99)00032-7; Armeli S, 1998, J APPL PSYCHOL, V83, P288, DOI 10.1037/0021-9010.83.2.288; Baruch Y, 2007, J WORLD BUS, V42, P99, DOI 10.1016/…	51	34	34	4	94	ROUTLEDGE JOURNALS, TAYLOR & FRANCIS LTD	ABINGDON	4 PARK SQUARE, MILTON PARK, ABINGDON OX14 4RN, OXFORDSHIRE, ENGLAND	0958-5192	1466-4399		INT J HUM RESOUR MAN	Int. J. Hum. Resour. Manag.	AUG 6	2014	5	25	14
J	Blitz, BK; Sales, R; Marzano, L				Blitz, BK; Sales, R; Marzano, L			Non-voluntary return? The politics of return to Afghanistan	POLITICAL STUDIES			English	Article								The forced removal of 35 Afghan nationals from the UK in April 2003 calls into question the viability of the government's voluntary repatriation schemes and undermines the voluntary nature of return programmes. This article draws on the results of research conducted in 2002 to explore the views of the Afghan community about return. We evaluate three motivations for promoting return programmes: ju…	Roehampton Univ, Sch Business & Social Sci, London SW15 5PU, England; Middlesex Univ, Social Policy Res Ctr, Enfield EN3 4SA, Middx, England; Middlesex Univ, Sch Hlth & Social Sci, Enfield EN3 4SA, Middx, England	Blitz, BK (corresponding author), Roehampton Univ, Sch Business & Social Sci, London SW15 5PU, England.	b.blitz@roehampton.ac.uk; r.sales@mdx.ac.uk; l.marzano@mdx.ac.uk		Blitz, Brad/0000-0003-4765-8806			*AFR CTR TECHN STU, 2000, RET REINT QUAL AFR N; BAKEWELL O, 1999, NEW ISSUES REFUGEE R; Black R, 1999, END REFUGEE CYCLE RE; BLITZ BK, 2003, POLITICS, V23, P181, DOI DOI 10.1111/1467-9256.00195; Bloch A., 2002, PROFESSIONAL CAPACIT; Castles S., 2003, STATES CONFLICT CAUS; *DACAAR IRC MADERA, 2002, EXP REP PATT 2002 RE; *EUR COUNC REF EX, 2003, CO2032003EXTAN EUR C; Ghosh B., 2000, RETURN MIGRATIO…	32	33	33	1	11	BLACKWELL PUBL LTD	OXFORD	108 COWLEY RD, OXFORD OX4 1JF, OXON, ENGLAND	0032-3217			POLIT STUD-LONDON	Polit. Stud.	MAR	2005	5	53	1
J	Adnett, N				Adnett, Nick			The growth of international students and economic development: friends or foes?	JOURNAL OF EDUCATION POLICY			English	Article						international students; brain drain; internationalisation of higher education; education and economic development	HIGHER-EDUCATION	In recent years there has been a significant growth in the number of international students. In several developed countries the inflow of foreign tertiary students has become a significant source of income for higher education (HE) providers and the economy as a whole. This net inflow of foreign students has been indirectly and, more recently, directly encouraged by government policies in these c…	Staffordshire Univ, Sch Business, Inst Educ Policy Res, Stoke On Trent ST4 2DF, Staffs, England	Adnett, N (corresponding author), Staffordshire Univ, Sch Business, Inst Educ Policy Res, Leek Rd, Stoke On Trent ST4 2DF, Staffs, England.	n.j.adnett@staffs.ac.uk					ADAMS J, 2009, W15233 NBER; Adnett N, 2006, HIGH EDUC Q, V60, P296, DOI 10.1111/j.1468-2273.2006.00325.x; Altbach P. G., 2009, TRENDS GLOBAL HIGHER; Altbach Philip, 2004, TERTIARY ED MANAGEME, V10, P3, DOI DOI 10.1080/13583883.2004.9967114; Barajas A., 2009, 09153 IMF; Bashir S., 2007, WORLD BANK ED WORKIN, V6; Beine M, 2008, ECON J, V118, P631, DOI 10.1111/j.1468-0297.2008.02135.x; Bennell P, 20…	46	33	33	1	19	ROUTLEDGE JOURNALS, TAYLOR & FRANCIS LTD	ABINGDON	2-4 PARK SQUARE, MILTON PARK, ABINGDON OX14 4RN, OXON, ENGLAND	0268-0939	1464-5106		J EDUC POLICY	J. Educ. Policy		2010	5	25	5
J	Harvey, WS				Harvey, William S.			British and Indian Scientists Moving to the United States	WORK AND OCCUPATIONS			English	Article						highly skilled migrants; social networks; Boston; pharmaceutical and biotechnology sector; human capital	SKILLED MIGRATION; INTERNATIONAL MIGRATION; BRAIN-DRAIN; HONG-KONG; TRANSNATIONAL ELITES; LABOR-MARKET; IMMIGRANTS; STRATEGIES; MOBILITY; FAMILY	This article analyses why British and Indian scientists working in Boston's pharmaceutical and biotechnology sector moved to the United States. Based on more than 200 structured interviews, the author examines two aspects of their migration. First, whether both groups differed in their reasons for migration and, second, how important economic and social network factors were in influencing their m…	Univ Oxford, Said Business Sch, Ctr Corp Reputat, Oxford OX1 1HP, England	Harvey, WS (corresponding author), Univ Oxford, Said Business Sch, Ctr Corp Reputat, Pk End St, Oxford OX1 1HP, England.	william.harvey@sbs.ox.ac.uk					Ackers L, 2005, INT MIGR, V43, P99, DOI 10.1111/j.1468-2435.2005.00343.x; Ackers L, 2004, WOMEN STUD INT FORUM, V27, P189, DOI 10.1016/j.wsif.2004.03.001; Ashenfelter O., 1999, HDB LABOR EC, V3, P1697, DOI DOI 10.1016/S1573-4463(99)03009-6; Bagchi AD, 2001, POPUL RES POLICY REV, V20, P9, DOI 10.1023/A:1010608225985; BALAZ V, 2004, POPULATION SPACE PLA, V0010; Bean FD, 2004, WORK OCCUPATION, V31, …	81	33	33	0	22	SAGE PUBLICATIONS INC	THOUSAND OAKS	2455 TELLER RD, THOUSAND OAKS, CA 91320 USA	0730-8884	1552-8464		WORK OCCUPATION	Work Occup.	FEB	2011	5	38	1
J	Dreher, A; Poutvaara, P				Dreher, Axel; Poutvaara, Panu			Foreign Students and Migration to the United States	WORLD DEVELOPMENT			English	Article						migration; education; student flows; brain drain; North America; United States	EDUCATION; RESTRICTIONS; IMMIGRATION	Using panel data for 78 countries of origin we examine the impact of the inflow of foreign students in to the United States on migration patterns in the country over the 1971-2001 period. We find that the stock of foreign students is an important predictor of subsequent migration. The estimated relationship shows that an increase in the number of students by 10% increases immigration to the Unite…	[Dreher, Axel] Univ Gottingen, D-3400 Gottingen, Germany; [Poutvaara, Panu] Univ Munich, D-80539 Munich, Germany	Dreher, A (corresponding author), Univ Gottingen, D-3400 Gottingen, Germany.		Poutvaara, Panu/AAW-4491-2020; Dreher, Axel/AAN-1839-2020	Dreher, Axel/0000-0002-7227-3599; Poutvaara, Panu/0000-0003-2070-784X			ARELLANO M, 1995, J ECONOMETRICS, V68, P29, DOI 10.1016/0304-4076(94)01642-D; BARRO R, 2000, INT DATA ED AT UNPUB; Binod Khadria, 2009, INDIA MIGRATION REPO; Blundell R, 1998, J ECONOMETRICS, V87, P115, DOI 10.1016/S0304-4076(98)00009-8; Borjas GJ, 1996, REV ECON STAT, V78, P165, DOI 10.2307/2109856; Bourdon J, 2010, J R STAT SOC A STAT, V173, P93, DOI 10.1111/j.1467-985X.2009.00601.x; Bowsher CG…	55	33	34	0	29	PERGAMON-ELSEVIER SCIENCE LTD	OXFORD	THE BOULEVARD, LANGFORD LANE, KIDLINGTON, OXFORD OX5 1GB, ENGLAND	0305-750X			WORLD DEV	World Dev.	AUG	2011	5	39	8
J	Dreher, A; Krieger, T; Meierrieks, D				Dreher, Axel; Krieger, Tim; Meierrieks, Daniel			Hit and (they will) run: The impact of terrorism on migration	ECONOMICS LETTERS			English	Article						Terrorism; Skilled migration; Brain drain; Panel estimation		We analyze the influence of terrorism on migration for 152 countries during 1976-2000. We find robust evidence that terrorism is among the 'push factors' of skilled migration, whereas it is not robustly associated with average migration. (C) 2011 Elsevier B.V. All rights reserved.	[Dreher, Axel] Univ Heidelberg, Alfred Weber Inst Econ, D-69115 Heidelberg, Germany; [Dreher, Axel] Univ Goettingen, IZA, Gottingen, Germany; [Krieger, Tim; Meierrieks, Daniel] Univ Paderborn, Dept Econ, D-33098 Paderborn, Germany	Dreher, A (corresponding author), Univ Heidelberg, Alfred Weber Inst Econ, Bergheimer Str 58, D-69115 Heidelberg, Germany.	mail@axel-dreher.de; tim.krieger@notes.uni-paderborn.de; daniel.meierrieks@notes.uni-paderborn.de	Dreher, Axel/AAN-1839-2020; Krieger, Tim/G-6241-2012	Dreher, Axel/0000-0002-7227-3599; Krieger, Tim/0000-0003-0045-9172			Abadie A, 2008, EUR ECON REV, V52, P1, DOI 10.1016/j.euroecorev.2007.08.005; Campos N. F., 2009, 7226 CEPR; DEFOORT C, 2008, LONG TERM TRENDS INT, V63, P285; Docquier F, 2007, WORLD BANK ECON REV, V21, P193, DOI 10.1093/wber/lhm008; Eggert W, 2010, J PUBLIC ECON, V94, P354, DOI 10.1016/j.jpubeco.2010.01.005; Frey BS, 2009, PUBLIC CHOICE, V138, P317, DOI 10.1007/s11127-008-9361-3; Gaibulloev K, 20…	16	33	33	0	9	ELSEVIER SCIENCE SA	LAUSANNE	PO BOX 564, 1001 LAUSANNE, SWITZERLAND	0165-1765			ECON LETT	Econ. Lett.	OCT	2011	5	113	1
J	Guo, C; Porschitz, ET; Alves, J				Guo, Chun; Porschitz, Emily T.; Alves, Jose			Exploring career agency during self-initiated repatriation: a study of Chinese sea turtles	CAREER DEVELOPMENT INTERNATIONAL			English	Article						Boundaryless careers; Career agency; China; Global career; Returnees; Self-initiated expatriation; Self-initiated repatriation; Careers; Career development; Expatriates	BOUNDARYLESS CAREERS; RETURNEE ENTREPRENEURS; GLOBAL CAREERS; UNITED-STATES; BRAIN-DRAIN; CULTURE; EXPERIENCES; PERFORMANCE; COGNITION; CHOICE	Purpose Drawing on career and self-initiated expatriation/repatriation literatures, this paper aims to examine the career experiences of Chinese self-initiated repatriates after their return to China. Design/methodology/approach - The authors conducted an exploratory, qualitative study involving in-depth interviews with 20 Chinese individuals who returned to China after spending at least three ye…	[Guo, Chun] Univ Cattolica Sacro Cuore, John F Welch Coll Business, Dept Management, Fairfield, CT USA; [Porschitz, Emily T.] Keene State Coll, Dept Management, Keene, NH USA; [Alves, Jose] USJ Univ St Joseph, Sch Management Leadership & Govt, Macau, Peoples R China	Guo, C (corresponding author), Univ Cattolica Sacro Cuore, John F Welch Coll Business, Dept Management, Fairfield, CT USA.	chun-guog@sacredheart.edu	Alves, Jose C/Q-7233-2018	Alves, Jose C/0000-0001-8535-1050			Al Ariss A, 2010, THUNDERBIRD INT BUS, V52, P275, DOI 10.1002/tie.20355; Arthur M., 1989, HDB CAREER THEORY; Baruch Y, 2007, J WORLD BUS, V42, P99, DOI 10.1016/j.jwb.2006.11.004; Begley Annette, 2008, Employee Relations, V30, P264, DOI 10.1108/01425450810866532; Berry J, 1980, ACCULTURATION THEORY; Bond M. H., 1986, PSYCHOL CHINESE PEOP, P213; Briscoe JP, 2006, J VOCAT BEHAV, V69, P4, DOI 10.1016…	72	33	33	0	31	EMERALD GROUP PUBLISHING LTD	BINGLEY	HOWARD HOUSE, WAGON LANE, BINGLEY BD16 1WA, W YORKSHIRE, ENGLAND	1362-0436	1758-6003		CAREER DEV INT	Career Dev. Int.		2013	5	18	1
J	Oberman, K				Oberman, Kieran			Can Brain Drain Justify Immigration Restrictions?	ETHICS			English	Article							MIGRATION; FREEDOM	This article considers one seemingly compelling justification for immigration restrictions: that they help restrict the brain drain of skilled workers from poor states. For some poor states, brain drain is a severe problem, sapping their ability to provide basic services. Yet this article finds that justifying immigration restrictions on brain drain grounds is far from straightforward. For restri…	Univ Coll Dublin, Dublin, Ireland	Oberman, K (corresponding author), Univ Coll Dublin, Dublin, Ireland.	kieran.oberman@ucd.ie	Oberman, Kieran/AAA-8574-2020	Oberman, Kieran/0000-0002-3592-2561			Ashford E, 2000, J PHILOS, V97, P421, DOI 10.2307/2678423; Beine M, 2001, J DEV ECON, V64, P275, DOI 10.1016/S0304-3878(00)00133-4; Brighouse Harry, 2011, ARGUING JUSTICE ESSA, p[115, 118]; Brock Gillian, 2009, GLOBAL JUSTICE COSMO; Burnham GM, 2009, SOC SCI MED, V69, P172, DOI 10.1016/j.socscimed.2009.05.021; Carens J. H., 1992, FREE MOVEMENT ETHICA, P25; Chikanda A, 2006, J ETHN MIGR STUD, V32,…	64	33	33	1	13	UNIV CHICAGO PRESS	CHICAGO	1427 E 60TH ST, CHICAGO, IL 60637-2954 USA	0014-1704	1539-297X		ETHICS	Ethics	APR	2013	5	123	3
J	Huang, TL; Orazem, PF; Wohlgemuth, D				Huang, TL; Orazem, PF; Wohlgemuth, D			Rural population growth, 1950-1990: The roles of human capital, industry structure, and government policy	AMERICAN JOURNAL OF AGRICULTURAL ECONOMICS			English	Article						brain drain; diversified employment; government services; human capital; rural-urban migration	FARM; DECISIONS; LABOR; MIGRATION; PRICES	Human capital raises rural incomes, but this effect is swamped by higher returns to human capital in urban markets. This leads to "brain drain" from rural areas. Populations grow more rapidly in rural counties that have a diversified employment base. Farm population grows faster (or declines more slowly) in counties with relatively high farm income, and nonfarm populations grow faster in counties…	Chung Yuan Christian Univ, Dept Int Trade, Chungli, Taiwan; Iowa State Univ, Dept Econ, Ames, IA 50011 USA; Iowa State Univ, Enrollment Serv, Ames, IA 50011 USA	Huang, TL (corresponding author), Chung Yuan Christian Univ, Dept Int Trade, Chungli, Taiwan.		Orazem, Peter/D-6525-2016	Orazem, Peter/0000-0003-2092-5089			AHEARN MC, 1993, 666 USDA ERS; BARKLEY AP, 1990, AM J AGR ECON, V72, P567, DOI 10.2307/1243025; BUTLER M, 1990, 9028 USDA; Fawson C, 1998, AM J AGR ECON, V80, P521, DOI 10.2307/1244554; Garkovich L, 1995, RURAL SOCIOL, V60, P571, DOI 10.1111/j.1549-0831.1995.tb00591.x; Gisser M, 1998, AM J AGR ECON, V80, P669, DOI 10.2307/1244055; Goetz SJ, 1996, AM J AGR ECON, V78, P517, DOI 10.2307/1243270; GYO…	20	32	33	0	18	BLACKWELL PUBLISHERS	MALDEN	350 MAIN STREET, STE 6, MALDEN, MA 02148 USA	0002-9092			AM J AGR ECON	Am. J. Agr. Econ.	AUG	2002	4	84	3
J	Jackson, DJR; Carr, SC; Edwards, M; Thorn, K; Allfree, N; Hooks, J; Inkson, K				Jackson, DJR; Carr, SC; Edwards, M; Thorn, K; Allfree, N; Hooks, J; Inkson, K			Exploring the dynamics of New Zealand's talent flow	NEW ZEALAND JOURNAL OF PSYCHOLOGY			English	Article							BRAIN-DRAIN; MIGRATION	Recruiting talented workers has become a global international concern, yet the diversity of human motives driving labour mobility has yet to be captured in any psychometric measure. By means of an internet survey administered through 32 professional associations based in New Zealand, 2201 highly skilled but expatriated New Zealanders completed a 26-item measure of issues pushing them towards stay…	Massey Univ, Dept Management & Int Business, Auckland, New Zealand	Jackson, DJR (corresponding author), Massey Univ, Dept Management & Int Business, Albany Campus,Private Shore 102 904, Auckland, New Zealand.	d.j.r.jackson@massey.ac.nz		Jackson, Duncan/0000-0001-9233-4232			Abrams D, 1999, INT J INTERCULT REL, V23, P319, DOI 10.1016/S0147-1767(98)00041-8; ADIR Y, 1995, J SOC BEHAV PERS, V10, P731; Arthur M. B., 1996, BOUNDARYLESS CAREER; BEDFORD R, 2001, NZ GEOGRAPHER, V57, P37; CARR SC, 2003, I O PSYCH MIGRATION; CARR SC, 2004, GLOBALISATION CULTUR; CARR SC, IN PRESS J WORLD BUS; CATTELL RB, 1966, MULTIVAR BEHAV RES, V1, P245, DOI 10.1207/s15327906mbr0102_10; Cheng…	34	32	33	1	13	NEW ZEALAND PSYCHOL SOC	WELLINGTON	BUSINESS MANAGER PO BOX 4092, WELLINGTON, NEW ZEALAND	0112-109X	1179-7924		NEW ZEAL J PSYCHOL	N. Z. J. Psychol.	JUL	2005	5	34	2
J	Wickramasekara, P				Wickramasekara, Piyasiri			Globalisation, International Labour Migration and the Rights of Migrant Workers	THIRD WORLD QUARTERLY			English	Article								The aim of the paper is to highlight the gaps between policy and practice in the current discourse on international migration and its links with development. In contends that a major cause of the limited development impact of migration is the 'closed door policy' of major destination countries on the admission of low-skilled migrant workers from developing countries. The paper addresses the weak …	Int Labor Org, Int Migrat Programme, CH-1211 Geneva 22, Switzerland	Wickramasekara, P (corresponding author), Int Labor Org, Int Migrat Programme, 4 Route Morillons, CH-1211 Geneva 22, Switzerland.	wickramasekara@ilo.org					Anderson K., 2008, DISCUSSION PAPER SER, V6760; ANNAN K, 2004, ADDRESS EUROPEAN PAR; [Anonymous], 2005, MIGR INT WORLD NEW D; BHAGWATI J, 2002, FINANCIAL TIMES 0726; BUSTAMANTE, SPECIFIC GROUPS INDI; BUSTAMANTE, 2008, 7 SESS 25 FEBR; BUSTAMANTE J, ECN4200673 COMM HUM; BUSTAMMANTE, PROMOTION PROTECTION; CASTLES, GUESTWORKERS EUROPE; Castles S, 2006, INT MIGR REV, V40, P741, DOI 10.1111/j.1747-7379…	82	32	33	0	7	ROUTLEDGE JOURNALS, TAYLOR & FRANCIS LTD	ABINGDON	4 PARK SQUARE, MILTON PARK, ABINGDON OX14 4RN, OXFORDSHIRE, ENGLAND	0143-6597			THIRD WORLD Q	Third World Q.		2008	5	29	7
J	Mechtenberg, L; Strausz, R				Mechtenberg, Lydia; Strausz, Roland			The Bologna process: how student mobility affects multi-cultural skills and educational quality	INTERNATIONAL TAX AND PUBLIC FINANCE			English	Article; Proceedings Paper	Conference on Higher Education, Multijurisdictionality and Globalisation	OCT, 2005	Catholic Univ Mons, Mons, BELGIUM		Catholic Univ Mons	student mobility; quality of education; multi-cultural skills; Bologna process	BRAIN-DRAIN	We analyze the two goals behind the European Bologna process of increasing student mobility: enabling graduates to develop multi-cultural skills and increasing the quality of universities. We isolate three effects: (1) a competition effect that raises quality, (2) a free-rider effect that lowers quality, and (3) a composition effect that influences the relative strengths of the two previous effec…	[Mechtenberg, Lydia; Strausz, Roland] Tech Univ Berlin, D-10623 Berlin, Germany; [Mechtenberg, Lydia; Strausz, Roland] Free Univ Berlin, D-1000 Berlin, Germany	Mechtenberg, L (corresponding author), Tech Univ Berlin, H50,Str 17 Juni 135, D-10623 Berlin, Germany.	l.mechtenberg@ww.tu-berlin.de		Strausz, Roland/0000-0001-7111-1486			Beine M, 2001, J DEV ECON, V64, P275, DOI 10.1016/S0304-3878(00)00133-4; Bhagwati J., 1974, J DEV ECON, V64, P275; BUTTNER T, 2004, BILDUNG, V33, P251; GRUBEL HB, 1966, AM ECON REV, V56, P268; JAHR V, 2002, INT MOBILITAT ABSOLV, V61; Justman M, 1997, ECON LETT, V55, P409, DOI 10.1016/S0165-1765(97)00084-0; Kemnitz A., 2005, ED FEDERALISM QUALIT; *OECD, 2006, ED GLANC; Poutvaara P., 2004, CESIFO E…	14	32	32	1	20	SPRINGER	DORDRECHT	VAN GODEWIJCKSTRAAT 30, 3311 GZ DORDRECHT, NETHERLANDS	0927-5940			INT TAX PUBLIC FINAN	Int. Tax Public Financ.	APR	2008	5	15	2
J	Danso, R				Danso, Ransford			Emancipating and Empowering De-Valued Skilled Immigrants: What Hope Does Anti-Oppressive Social Work Practice Offer?	BRITISH JOURNAL OF SOCIAL WORK			English	Article						anti-oppressive practice; globalization; oppression; skilled immigrants of colour; social justice	PARTICIPATION-BASED FRAMEWORK; GLOBALIZATION; UNEMPLOYMENT; MIGRATION; REFUGEES; PROFESSIONALS; MIGRANTS; EARNINGS; WOMEN	Globalization and the transnational movement of people have intensified the migration of highly educated people from developing countries to the industrialized countries of the North. While causing a serious 'brain drain' or 'talent shortage' in developing countries, these migrations have also produced profound ethnic, cultural and racial diversity in receiving countries. Even as developed countr…	Sheridan Coll Inst Technol & Adv Learning, Sch Community & Liberal Studies, Social Serv Worker Program, Brampton, ON L6Y 5H9, Canada	Danso, R (corresponding author), Sheridan Coll Inst Technol & Adv Learning, Sch Community & Liberal Studies, Social Serv Worker Program, 7899 McLaughlin Rd,POB 7500, Brampton, ON L6Y 5H9, Canada.	ransford.danso@sheridanc.on.ca					Abu-Laban Y, 2002, SELLING DIVERSITY IM; ALBOIM N, 2003, INTEGRATING IMMIGRAN; Barnoff L, 2007, AFFILIA J WOM SOC WO, V22, P56, DOI 10.1177/0886109906295772; Beresford P, 2006, SOC WORK EDUC, V25, P326, DOI 10.1080/02615470600593493; Brown L., 2005, RES RESISTANCE CRITI; BURKE B, 2002, SOCIAL WORK THEMES I, P227; Cox D., 2006, INT SOCIAL WORK ISSU; Dalrymple J., 1995, ANTIOPPRESSIVE PRACT; DANSO,…	82	32	32	0	36	OXFORD UNIV PRESS	OXFORD	GREAT CLARENDON ST, OXFORD OX2 6DP, ENGLAND	0045-3102	1468-263X		BRIT J SOC WORK	Br. J. Soc. Work	APR	2009	5	39	3
J	Deressa, W; Azazh, A				Deressa, Wakgari; Azazh, Aklilu			Attitudes of undergraduate medical students of Addis Ababa University towards medical practice and migration, Ethiopia	BMC MEDICAL EDUCATION			English	Article							SUB-SAHARAN AFRICA; HEALTH-PROFESSIONALS; JOB-SATISFACTION; CAREER CHOICES; BRAIN-DRAIN; MOTIVATION; PHYSICIANS; WORKERS; NURSES; VIEWS	Background: The health care system of Ethiopia is facing a serious shortage of health workforce. While a number of strategies have been developed to improve the training and retention of medical doctors in the country, understanding the perceptions and attitudes of medical students towards their training, future practice and intent to migrate can contribute in addressing the problem. This study w…	[Deressa, Wakgari] Univ Addis Ababa, Coll Hlth Sci, Sch Publ Hlth, Dept Epidemiol & Biostat, Addis Ababa, Ethiopia; [Azazh, Aklilu] Univ Addis Ababa, Coll Hlth Sci Addis, Sch Med, Dept Internal Med, Addis Ababa, Ethiopia	Deressa, W (corresponding author), Univ Addis Ababa, Coll Hlth Sci, Sch Publ Hlth, Dept Epidemiol & Biostat, Addis Ababa, Ethiopia.	deressaw@yahoo.com			Faculty of Medicine; School of Public Health at Addis Ababa University	The study was funded by the Faculty of Medicine and partly supported by the School of Public Health at Addis Ababa University. The authors wish to acknowledge Mr. Abiy Seifu for coordinating and supervising the data collection. We gratefully acknowledge the enthusiastic participation of medical students for their time and for sharing their experiences. We also thank Prof. Damen Hailemariam for hi…	Akl EA, 2007, SOC SCI MED, V64, P1278, DOI 10.1016/j.socscimed.2006.10.021; [Anonymous], 2006, ETH DEM HLTH SURV 20; [Anonymous], 2008, 2007 NAT CENS PREL R; Astor A, 2005, SOC SCI MED, V61, P2492, DOI 10.1016/j.socscimed.2005.05.003; Awases M, 2004, MIGRATION HLTH PROFE; Azer S A, 2001, Aust J Rural Health, V9, P178, DOI 10.1046/j.1038-5282.2001.00359.x; Berhan Yifru, 2008, Ethiop Med J, V46 Sup…	43	32	32	1	30	BMC	LONDON	CAMPUS, 4 CRINAN ST, LONDON N1 9XW, ENGLAND		1472-6920		BMC MED EDUC	BMC Med. Educ.	AUG 6	2012	5	12
J	Sheikh, A; Naqvi, SHA; Sheikh, K; Naqvi, SHS; Bandukda, MY				Sheikh, Asfandyar; Naqvi, Syed Hassan Abbas; Sheikh, Kainat; Naqvi, Syed Hassan Shiraz; Bandukda, Muhammad Yasin			Physician migration at its roots: a study on the factors contributing towards a career choice abroad among students at a medical school in Pakistan	GLOBALIZATION AND HEALTH			English	Article							IMMIGRATION; DOCTORS; REASONS; VIEWS	Background: Physician migration, also known as "brain drain," results from a combination of a gap in the supply and demand in developed countries and a lack of job satisfaction in developing countries. Many push and pull factors are responsible for this effect, with media and internet playing their parts. Large-scale physician migration can pose problems for both the donor and the recipient count…	[Sheikh, Asfandyar; Naqvi, Syed Hassan Abbas; Naqvi, Syed Hassan Shiraz; Bandukda, Muhammad Yasin] Dow Univ Hlth Sci, Dow Med Coll, Karachi, Pakistan; [Sheikh, Kainat] Dow Univ Hlth Sci, Sindh Med Coll, Karachi, Pakistan	Sheikh, A (corresponding author), Dow Univ Hlth Sci, Dow Med Coll, Baba E Urdu Rd, Karachi, Pakistan.	asfandyarsheikh@gmail.com		Sheikh, Asfandyar/0000-0003-1755-0482			Akl EA, 2008, BMC PUBLIC HEALTH, V8, DOI 10.1186/1471-2458-8-191; Aluwihare APR, 2005, J CONTIN EDUC HEALTH, V25, P15, DOI 10.1002/chp.4; [Anonymous], FEES PAYM; [Anonymous], 2012, NRMP RES DAT; Arah OA, 2008, AM J PUBLIC HEALTH, V98, P148, DOI 10.2105/AJPH.2006.095844; Astor A, 2005, SOC SCI MED, V61, P2492, DOI 10.1016/j.socscimed.2005.05.003; Bezuidenhout MM, 2009, S AFR FAM PRACT, V51, P211, …	30	32	32	0	23	BMC	LONDON	CAMPUS, 4 CRINAN ST, LONDON N1 9XW, ENGLAND	1744-8603			GLOBALIZATION HEALTH	Global. Health	DEC 15	2012	5	8
J	Cao, L; Hirschi, A; Deller, J				Cao, Lan; Hirschi, Andreas; Deller, Juergen			The positive effects of a protean career attitude for self-initiated expatriates Cultural adjustment as a mediator	CAREER DEVELOPMENT INTERNATIONAL			English	Article						Self-initiated expatriation; Protean career; Cultural adjustment; Career satisfaction; Intention to stay; International mobility; Cultural distance; Expatriates	BOUNDARYLESS CAREERS; BRAIN-DRAIN; STAY; EXPERIENCES; ANTECEDENTS; ASSIGNMENT; SUCCESS; MODELS; WORK	Purpose The authors sought to explain why and how protean career attitude might influence self-initiated expatriates' (SIEs) experiences positively. A mediation model of cultural adjustment was proposed and empirically evaluated. Design/methodology/approach - Data from 132 SIEs in Germany containing measures of protean career attitude, cultural adjustment, career satisfaction, life satisfaction, …	[Cao, Lan; Deller, Juergen] Univ Luneburg, Inst Strateg HR Management Res & Dev, Luneburg, Germany; [Hirschi, Andreas] Univ Lausanne, Inst Psychol, Lausanne, Switzerland	Cao, L (corresponding author), Univ Luneburg, Inst Strateg HR Management Res & Dev, Luneburg, Germany.	lan.cao@leuphana.de	Cao, Lan/AAW-5614-2020; Deller, Jurgen/A-7638-2008; Hirschi, Andreas/E-4858-2011	Hirschi, Andreas/0000-0001-8766-3314			AJZEN I, 1991, ORGAN BEHAV HUM DEC, V50, P179, DOI 10.1016/0749-5978(91)90020-T; Al Ariss A, 2010, CAREER DEV INT, V15, P338, DOI 10.1108/13620431011066231; Andresen M, 2015, INT J HUM RESOUR MAN, V26, P932, DOI 10.1080/09585192.2012.669780; Arthur MB, 2005, J ORGAN BEHAV, V26, P177, DOI 10.1002/job.290; Baruch Y, 2007, HUM RESOUR MANAGE-US, V46, P471, DOI 10.1002/hrm.20178; Baruch Y, 2007, J WOR…	56	32	32	0	48	EMERALD GROUP PUBLISHING LTD	BINGLEY	HOWARD HOUSE, WAGON LANE, BINGLEY BD16 1WA, W YORKSHIRE, ENGLAND	1362-0436	1758-6003		CAREER DEV INT	Career Dev. Int.		2013	5	18	1
J	Bandiera, O; Rasul, I; Viarengo, M				Bandiera, Oriana; Rasul, Imran; Viarengo, Martina			The Making of Modern America: Migratory Flows in the Age of Mass Migration	JOURNAL OF DEVELOPMENT ECONOMICS			English	Article						Ellis Island; migration accounting; migratory inflows and outflows	MEXICO-US MIGRATION; INTERNATIONAL MIGRATION; RETURN MIGRATION; EMPIRICAL-EVIDENCE; SELF-SELECTION; 1918 INFLUENZA; LABOR-MARKETS; FOREIGN-BORN; BRAIN-DRAIN; NEW-YORK	We provide new estimates of migrant flows into and out of America during the Age of Mass Migration at the turn of the twentieth century. Our analysis is based on a novel data set of administrative records covering the universe of 24 million migrants who entered Ellis Island, New York between 1892 and 1924. We use these records to measure inflows into New York, and then scale-up these figures to e…	[Bandiera, Oriana] Univ London London Sch Econ & Polit Sci, Dept Econ, London WC2A 2AE, England; [Rasul, Imran] UCL, Dept Econ, London WC1E 6BT, England	Rasul, I (corresponding author), UCL, Dept Econ, London WC1E 6BT, England.	o.bandiera@lse.ac.uk; i.rasul@ucl.ac.uk; martina.viarengo@graduateinstitute.ch			Economic and Social Research CouncilEconomic & Social Research Council (ESRC) [ES/H02123X/1] Funding Source: Researchfish		Abramitzky R, 2013, J DEV ECON, V102, P2, DOI 10.1016/j.jdeveco.2012.08.004; Abramitzky R, 2012, AM ECON REV, V102, P1832, DOI 10.1257/aer.102.5.1832; Abramitzky Ran, 2012, 18011 NBER; Acemoglu Daron, 2005, HDB EC GROWTH; Acosta P, 2008, WORLD DEV, V36, P89, DOI 10.1016/j.worlddev.2007.02.016; Agrawal A, 2011, J URBAN ECON, V69, P43, DOI 10.1016/j.jue.2010.06.003; Almond D, 2006, J POLIT ECON, V1…	141	32	32	0	31	ELSEVIER	AMSTERDAM	RADARWEG 29, 1043 NX AMSTERDAM, NETHERLANDS	0304-3878	1872-6089		J DEV ECON	J. Dev. Econ.	MAY	2013	5	102
J	van der Wende, M				van der Wende, Marijk			International Academic Mobility: Towards a Concentration of the Minds in Europe	EUROPEAN REVIEW			English	Article; Proceedings Paper	2013 Conference on Migration and Mobility in Science: Impact on Cultures and the Profession in Institutions of Higher Education	NOV 14-16, 2013	Palazzo Corsini, Rome, ITALY		Palazzo Corsini			International mobility of academics has risen over the last few decades, especially among PhD students and post-docs. This may be the result of deliberate policies to stimulate such mobility on the one hand and of growing imbalances in academic career opportunities on the other. The general belief that attracting international talents helps to ensure that a country plays a leading role in researc…	Vrije Univ Amsterdam, Amsterdam Univ Coll, NL-1098 XG Amsterdam, Netherlands	van der Wende, M (corresponding author), Vrije Univ Amsterdam, Amsterdam Univ Coll, Sci Pk 113, NL-1098 XG Amsterdam, Netherlands.	m.c.vanderwende@auc.nl					ALTBACH P. G., 2013, INT HIGHER ED, P2; [Anonymous], 2013, U WORLD NEWS MAY; Asian Development Bank, 2014, LAB MIGR SKILLS STUD; Auriol L, 2012, OECD SCI TECHNOLOGY, V2012/07, DOI 10.1787/5k4dnq2h4n5c-en; Auriol L, 2013, OECD SCI TECHNOLOGY, V2013; Auriol L., 2010, 20104 STI STAT AN SC; Avvisati F., 2013, TUNING J HIGHER ED, V1, P1; Corbett A., 2013, U WORLD NEWS; EU, 2013, EU SKILLS PAN; Europea…	48	32	32	5	28	CAMBRIDGE UNIV PRESS	CAMBRIDGE	EDINBURGH BLDG, SHAFTESBURY RD, CB2 8RU CAMBRIDGE, ENGLAND	1062-7987	1474-0575		EUR REV	Eur. Rev.	MAY	2015	6	23			1
J	Bartolini, L; Gropas, R; Triandafyllidou, A				Bartolini, Laura; Gropas, Ruby; Triandafyllidou, Anna			Drivers of highly skilled mobility from Southern Europe: escaping the crisis and emancipating oneself	JOURNAL OF ETHNIC AND MIGRATION STUDIES			English	Article						Highly skilled migration; mobility; economic crisis; emigration; brain drain; Southern Europe; Greece; Italy; Spain; Portugal	INTERNATIONAL MIGRATION; EDUCATION; ABROAD	Since the outbreak of the crisis in Southern Europe, young highly educated Italians, Spaniards, Portuguese and Greeks have been taking their talents and expertise to other countries in search of a better quality of life and career prospects. This paper explores the characteristics of these new emigrants, the reasons for which they are leaving, and whether these reasons are shaped by the economic …	[Bartolini, Laura; Triandafyllidou, Anna] European Univ Inst, Robert Schuman Ctr Adv Studies, Florence, Italy; [Gropas, Ruby] Democritus Univ Thrace, Law Fac, Komotini, Greece; [Gropas, Ruby] Coll Europe, Brugge, Belgium	Bartolini, L (corresponding author), European Univ Inst, Robert Schuman Ctr Adv Studies, Florence, Italy.	laura.bartolini@eui.eu	Triandafyllidou, Anna/Z-5055-2019; Bartolini, Laura/AAA-7099-2020	Triandafyllidou, Anna/0000-0001-6760-0033;			Arslan C., 2014, OECD SOCIAL EMPLOYME; Barro RJ, 2013, J DEV ECON, V104, P184, DOI 10.1016/j.jdeveco.2012.10.001; Beck U., 1992, RISK SOC NEW MODERNI; Beck U., 2002, INDIVIDUALIZATION I; Bell DNF, 2011, OXFORD REV ECON POL, V27, P241, DOI 10.1093/oxrep/grr011; Blossfeld H. -P., 2015, GENDER ED EMPLOYMENT; Brown P, 2004, MISMANAGEMENT TALENT; Cairns D, 2014, INT MIGR, V52, P236, DOI 10.1111/j.1468…	45	32	32	1	25	ROUTLEDGE JOURNALS, TAYLOR & FRANCIS LTD	ABINGDON	2-4 PARK SQUARE, MILTON PARK, ABINGDON OX14 4RN, OXON, ENGLAND	1369-183X	1469-9451		J ETHN MIGR STUD	J. Ethn. Migr. Stud.	MAR	2017	6	43	4
J	Mayeya, J; Chazulwa, R; Mayeya, PN; Mbewe, E; Magolo, LM; Kasisi, F; Bowa, AC				Mayeya, J; Chazulwa, R; Mayeya, PN; Mbewe, E; Magolo, LM; Kasisi, F; Bowa, AC			Zambia mental health country profile	INTERNATIONAL REVIEW OF PSYCHIATRY			English	Article								This country profile for Zambia was compiled between 1998 and 2002. The objectives of the exercise were to first of all avail policymakers, other key decision makers and leaders in Zambia, information about mental health in Zambia in order to assist policy and services development. Secondly, to facilitate comparative analyses of mental health services between countries. The work involved formatio…	Cent Board Hlth, Lusaka, Zambia; Chainama Hills Coll Hosp, Lusaka, Zambia; Chainama Coll Hlth Sci, Lusaka, Zambia	Mayeya, J (corresponding author), Cent Board Hlth, Lusaka, Zambia.	jmayeya@cboh.org.zm					BOORG J, 1999, RAPID ASSESSMENT STU; *CENTR STAT OFF, 1996, ZAMB DEM HLTH SURV; *CENTR STAT OFF, 1998, LIV COND MON SURV 19; Gleisner J, 2001, STATE ZAMBIAN PSYCHI; HAWORTH A, 1993, INT HDB MENTAL HLTH; KIESLER C, 1987, MENTAL HOSP MYTHS FA; *MIN FRANC, 1999, EC REP; *MIN HLTH, 2000, JOINT ID FORM MISS Z; *MIN HLTH, 1979, PRIOR MENT HLTH CAR; *SO AFR RES SOC CT, 1998, IN WOM ZAMB; UNDP, 1999, HUM…	11	31	32	2	30	CARFAX PUBLISHING	BASINGSTOKE	RANKINE RD, BASINGSTOKE RG24 8PR, HANTS, ENGLAND	0954-0261			INT REV PSYCHIATR	Int. Rev. Psych.	FEB-MAY	2004	4	16	43862
J	Perrin, ME; Hagopian, A; Sales, A; Huang, B				Perrin, M. E.; Hagopian, A.; Sales, A.; Huang, B.			Nurse migration and its implications for Philippine hospitals	INTERNATIONAL NURSING REVIEW			English	Article						brain drain; nurse migration; Philippines; recruitment; registered nurses		Background: 'Push'and'pull' factors motivate Filipino registered nurses (RNs) to leave for employment in foreign countries making the Philippines the leading source country for nurses overseas. Objective: To assess the current RN-staffing situation in Philippine hospitals. Design: A self-administered survey was mailed to a sample of 200 Philippine hospital chiefs of nurses. Results: According to …	Univ Washington, Sch Nursing, Seattle, WA 98195 USA; Univ Washington, Sch Publ Hlth & Community Med, Hlth Serv, Seattle, WA 98195 USA; Univ Washington, Sch Med, Program Healthy Communities, Deans Off, Seattle, WA 98195 USA; Univ Washington, Sch Social Work, Seattle, WA 98195 USA	Perrin, ME (corresponding author), Univ Washington, Sch Nursing, Box 357266, Seattle, WA 98195 USA.	mperrin@u.washington.edu	Sales, Anne/D-9678-2012	Sales, Anne/0000-0001-9360-3334			ADVERSARIO P, 2003, MANILA TIMES; Aiken LH, 2004, HEALTH AFFAIR, V23, P69, DOI 10.1377/hlthaff.23.3.69; ALBURO FA, 2002, INT MIGRATION PAPERS; *AONE, 2002, AC CAR HOSP SURV RN; Armstrong F., 2003, AUSTR NURSING J, V11, P25; BACH S, 2003, SECTORAL ACTIVITIES; Buchan J., 2003, INT NURSE MOBILITY T; Choy Catherine Ceniza, 2003, EMPIRE CARE NURSING; CORCEGA TT, 2002, UP MANILA J, V5, P1; Gamble DA, 2…	23	31	31	0	7	BLACKWELL PUBLISHING	OXFORD	9600 GARSINGTON RD, OXFORD OX4 2DQ, OXON, ENGLAND	0020-8132			INT NURS REV	Int. Nurs. Rev.	SEP	2007	5	54	3
J	Coniglio, ND; Prota, F				Coniglio, Nicola D.; Prota, Francesco			Human capital accumulation and migration in a peripheral EU region: the case of Basilicata	PAPERS IN REGIONAL SCIENCE			English	Article; Proceedings Paper	43rd Congress of the European-Regional-Science-Association	2003	Jyvaskyla, FINLAND	European Reg Sci Assoc		education; human capital; brain drain; migration; regional policy	UNITED-STATES; UNEMPLOYMENT; MOBILITY; LABOR; AGE	We investigate the challenges that migration flows pose on policymaking aimed at fostering human capital accumulation in peripheral regions. We employ a unique data set generated through a postal survey designed and conducted by the authors. The focus of our analysis is on the micro-level location decisions of a sample of highly educated and skilled individuals residing in Basilicata, an Italian …	[Coniglio, Nicola D.] Univ Bari, Dipartimento Sci Econ, I-70124 Bari, Italy; [Coniglio, Nicola D.] CASE, Bergen, Norway; [Prota, Francesco] Univ Bari, Dipartimento Studio Soc Mediterranee, I-70121 Bari, Italy	Coniglio, ND (corresponding author), Univ Bari, Dipartimento Sci Econ, Via C Rosalba 53, I-70124 Bari, Italy.	nicola.coniglio@snf.no; prota.francesco@tin.it	Coniglio, Nicola Daniele/AAD-9851-2019	Coniglio, Nicola Daniele/0000-0001-6488-4122; Prota, Francesco/0000-0001-6251-6916			Antolin P, 1997, OXFORD B ECON STAT, V59, P215, DOI 10.1111/1468-0084.00061; Braumoeller BF, 2004, INT ORGAN, V58, P807, DOI 10.1017/S0020818304040251; Bresnahan Timothy, 2001, IND CORP CHANGE, V10, P835, DOI DOI 10.1093/ICC/10.4.835; Carrington WJ, 1996, AM ECON REV, V86, P909; Ciccone A, 2002, EUR ECON REV, V46, P213, DOI 10.1016/S0014-2921(00)00099-4; CONIGLIO ND, 2003, DISCUSSION PAPER SER, V…	38	31	32	0	10	WILEY	HOBOKEN	111 RIVER ST, HOBOKEN 07030-5774, NJ USA	1056-8190	1435-5957		PAP REG SCI	Pap. Reg. Sci.	MAR	2008	5	87	1
J	Mackey, TK; Liang, BA				Mackey, Timothy Ken; Liang, Bryan Albert			Rebalancing brain drain: Exploring resource reallocation to address health worker migration and promote global health	HEALTH POLICY			English	Article						Brain drain; Migration; Global health; Health equity; Justice; Health systems; Health infrastructure; Health policy; Health law; Health workers	DEVELOPING-COUNTRIES; CRISIS; CODE; WORKFORCE; JUSTICE; CONDUCT	Global public health is threatened by an imbalance in health worker migration from resource-poor countries to developed countries. This "brain drain" results in health workforce shortages, health system weakening, and economic loss and waste, threatening the well-being of vulnerable populations and effectiveness of global health interventions. Current structural imbalances in resource allocation …	[Mackey, Timothy Ken; Liang, Bryan Albert] Calif Western Sch Law, Inst Hlth Law Studies, San Diego, CA USA; [Mackey, Timothy Ken] San Diego State Univ, Univ Calif San Diego, Joint Doctoral Program Global Hlth, San Diego, CA 92182 USA; [Liang, Bryan Albert] Univ Calif San Diego, San Diego Sch Med, San Diego Ctr Patient Safety, Calif Western Sch Law,Inst Hlth Law Studies, San Diego, CA 92101 USA; […	Mackey, TK (corresponding author), Calif Western Sch Law, Inst Hlth Law Studies, San Diego, CA USA.	tmackey@ucsd.edu; baliang@alum.mit.edu	Mackey, Tim/H-9156-2013	Mackey, Tim/0000-0002-2191-7833			Agwu K, 2009, LANCET, V373, P1665, DOI 10.1016/S0140-6736(09)60927-2; Bristol N, 2008, LANCET, V371, P2162, DOI 10.1016/S0140-6736(08)60937-X; Chen L, 2004, LANCET, V364, P1984, DOI 10.1016/S0140-6736(04)17482-5; Cheng MH, 2009, LANCET, V373, P111, DOI 10.1016/S0140-6736(09)60022-2; Edge J, 2011, EMPIRICAL IMPACT EVA; Feldbaum H, 2010, PLOS MED, V7, DOI 10.1371/journal.pmed.1000226; Foster Richar…	40	31	32	0	19	ELSEVIER IRELAND LTD	CLARE	ELSEVIER HOUSE, BROOKVALE PLAZA, EAST PARK SHANNON, CO, CLARE, 00000, IRELAND	0168-8510			HEALTH POLICY	Health Policy	SEP	2012	5	107	1
J	Bui, HTM; Baruch, Y				Bui, Hong T. M.; Baruch, Yehuda			Learning organizations in higher education: An empirical evaluation within an international context	MANAGEMENT LEARNING			English	Article						Collectivism; individualism; leadership; organizational culture; Senge's learning organization	SYSTEMS THINKING; MEDIATING ROLE; MANAGEMENT-PRACTICES; TEAM EFFECTIVENESS; BRAIN-DRAIN; LEADERSHIP; ANTECEDENTS; COMMITMENT; ORIENTATION; PERFORMANCE	We proposed and examined a learning organization framework in higher education within an international context. Using a sample of 687 employees in the UK and Vietnam, we tested the relationships between personal mastery, mental models, team learning, shared visions and systems thinking with their antecedents and outcomes. Our findings support the suggested learning organization model. As predicte…	[Baruch, Yehuda] Rouen Business Sch, F-76825 Mont St Aignan, France; [Bui, Hong T. M.] Bournemouth Univ, Poole BH12 5BB, Dorset, England; [Bui, Hong T. M.] Vietnam Natl Univ, Hanoi, Vietnam; [Baruch, Yehuda] Middlesex Univ, London N17 8HR, England	Baruch, Y (corresponding author), Rouen Business Sch, Blvd Andre Siegfried,BP 215, F-76825 Mont St Aignan, France.	yehuda.baruch@rouenbs.fr		Bui, Hong/0000-0001-7895-2106			Abdallah S., 2009, UNHAPPY PLANET INDEX; Alavi S.B., 2004, INT J ED MANAGEMENT, V18, P408, DOI DOI 10.1108/09513540410563112; Altbach P.G., 1989, DEPENDENCE AUTONOMY; Amidon SR, 2005, BUS PROF COMMUN Q, V68, P406, DOI 10.1177/1080569905281758; An Y.-Y., 2005, PERFORMANCE IMPROVEM, V44, P34; ANCONA DG, 1990, ACAD MANAGE J, V33, P334, DOI 10.2307/256328; Andersen DF, 2006, J PUBLIC AFF EDUC, V12, P…	210	31	31	5	89	SAGE PUBLICATIONS LTD	LONDON	1 OLIVERS YARD, 55 CITY ROAD, LONDON EC1Y 1SP, ENGLAND	1350-5076	1461-7307		MANAGE LEARN	Manage. Learn.	NOV	2012	5	43	5
J	Konschnik, KE; Boling, MK				Konschnik, Katherine E.; Boling, Mark K.			Shale Gas Development: A Smart Regulation Framework	ENVIRONMENTAL SCIENCE & TECHNOLOGY			English	Article							METHANE LEAKS; DISPOSAL	Advances in directional drilling and hydraulic fracturing have sparked a natural gas boom from shale formations in the United States. Regulators face a rapidly changing industry comprised of hundreds of players, operating tens of thousands of wells across 30 states. They are often challenged to respond by budget cuts, a brain drain to industry, regulations designed for conventional gas developmen…	[Konschnik, Katherine E.] Harvard Univ, Sch Law, Environm Law Program, Cambridge, MA 02138 USA; [Boling, Mark K.] V Dev Solut Div, Houston, TX 77032 USA; [Boling, Mark K.] Southwestern Energy Co, Houston, TX 77032 USA	Konschnik, KE (corresponding author), Harvard Univ, Sch Law, Environm Law Program, 6 Everett St, Cambridge, MA 02138 USA.	kkonschnik@law.harvard.edu					Allen D. T., 2013, P NATL ACAD SCI; [Anonymous], 2013, MOD SHAL GAS DEV US; [Anonymous], 2012, GAO12732, P36; [Anonymous], 2013, FED REGISTER, V78, P31636; [Anonymous], HYDR FRACT FRAC; [Anonymous], 2009, MOD SHAL GAS DEV US, P28; [Anonymous], 2012, OIL NAT GAS SECT STA; [Anonymous], 2011, US CRUD OIL NAT GAS, P12; [Anonymous], 2013, VER PROT; [Anonymous], APPL PERM DRILL FORM; [Anonymous], 2009,…	128	31	31	1	56	AMER CHEMICAL SOC	WASHINGTON	1155 16TH ST, NW, WASHINGTON, DC 20036 USA	0013-936X	1520-5851		ENVIRON SCI TECHNOL	Environ. Sci. Technol.	AUG 5	2014	5	48	15
J	Starfield, B; Fryer, GE				Starfield, Barbara; Fryer, George E., Jr.			The primary care physician workforce: Ethical and policy implications	ANNALS OF FAMILY MEDICINE			English	Article						foreign medical graduates; primary health care; brain drain; US public policy/manpower	MEDICAL GRADUATE PIPELINE; HEALTH-PROFESSIONALS; BRAIN-DRAIN; HUMAN-RESOURCES; CRISIS; CERTIFICATION; ATTRITION; PROGRAMS; SYSTEMS; TRENDS	PURPOSE We undertook a study to examine the characteristics of countries exporting physicians to the United States according to their relative contribution to the primary care supply in the United States. METHODS We used data from the World Health Organization and from the American Medical Association Physician Masterfile to gather sociodemographic, health system, and health characteristics of co…	Johns Hopkins Univ, Sch Publ Hlth, Baltimore, MD 21205 USA; NYU, Sch Med, New York, NY USA	Starfield, B (corresponding author), Johns Hopkins Univ, Sch Publ Hlth, 624 N Broadway,Room 452, Baltimore, MD 21205 USA.	bstarfie@jhsph.edu					American Academy of Family Physicians, 2007, NAT RES MATCH PROGR; Anand S, 2004, LANCET, V364, P1603, DOI 10.1016/S0140-6736(04)17313-3; Boulet JR, 2006, HEALTH AFFAIR, V25, P469, DOI 10.1377/hlthaff.25.2.469; Chen LC, 2005, NEW ENGL J MED, V353, P1850, DOI 10.1056/NEJMe058188; Cooper RA, 2002, HEALTH AFFAIR, V21, P140, DOI 10.1377/hlthaff.21.1.140; Fink KS, 2003, HEALTH AFFAIR, V22, P255, DOI 10…	23	30	30	0	6	ANNALS FAMILY MEDICINE	LEAWOOD	11400 TOMAHAWK CREEK PARKWAY, LEAWOOD, KS 66211-2672 USA	1544-1709	1544-1717		ANN FAM MED	Ann. Fam. Med.	NOV-DEC	2007	5	5	6
J	Guth, J; Gill, B				Guth, Jessica; Gill, Bryony			Motivations in east-west doctoral mobility: Revisiting the question of brain drain	JOURNAL OF ETHNIC AND MIGRATION STUDIES			English	Article						mobility; migration motivations; Eastern Europe; doctorates; science careers	KNOWLEDGE	Science is conducted in an increasingly international domain but it is highly questionable whether scientists have equal chances, both professionally and personally, as opportunities and working conditions vary enormously. Drawing on new empirical research with Eastern European scientists, this article explores the professional motivations of Polish and Bulgarian doctoral scientists who have 'gon…	[Guth, Jessica] Univ Bradford, Sch Law, Sch Management, Bradford BD9 4JL, W Yorkshire, England	Guth, J (corresponding author), Univ Bradford, Sch Law, Sch Management, Emm Lane, Bradford BD9 4JL, W Yorkshire, England.	j.guth@bradford.ac.uk		Guth, Jessica/0000-0002-6362-7797	Economic and Social Research CouncilEconomic & Social Research Council (ESRC) [RES-151-25-0028] Funding Source: Researchfish		ACKERS HL, 2005, EUROPEAN J SOCIAL SC, V18, P301; ACKERS HL, 2001, PARTICIPATION WOMEN; Ackers L, 2005, INT MIGR, V43, P99, DOI 10.1111/j.1468-2435.2005.00343.x; AVVEDUTO S, 2001, INNOVATIVE PEOPLE MO, P229; BRANDI MC, 2003, HIST EVOLUTION QUALI; CASEY T, 2001, MOBILITY ACAD RES AC; CHOBANOVA R, 2003, FLOWS NON EU EUROPE; Currie S., 2006, EUROPEAN LAW REV, V31, P207; *DEP TRAD IND, 2002, KNOWL MI…	44	30	32	1	13	ROUTLEDGE JOURNALS, TAYLOR & FRANCIS LTD	ABINGDON	4 PARK SQUARE, MILTON PARK, ABINGDON OX14 4RN, OXFORDSHIRE, ENGLAND	1369-183X			J ETHN MIGR STUD	J. Ethn. Migr. Stud.		2008	5	34	5
J	Gureje, O; Hollins, S; Botbol, M; Javed, A; Jorge, M; Okech, V; Riba, M; Trivedi, JK; Sartorius, N; Jenkins, R				Gureje, Oye; Hollins, Sheila; Botbol, Michel; Javed, Afzal; Jorge, Miguel; Okech, Violet; Riba, Michelle; Trivedi, Jitendra K.; Sartorius, Norman; Jenkins, Rachel			Report of the WPA Task Force on Brain Drain	WORLD PSYCHIATRY			English	Article						Brain drain; mental health professionals; low- and middle-income countries	HEALTH-PROFESSIONALS; MENTAL-HEALTH; DEVELOPING-COUNTRIES; MEDICAL MIGRATION; POOR COUNTRIES; WORKFORCE; WORKERS; DOCTORS; AFRICA; NEEDS	The brain drain of health professionals is an issue of continuing interest and debate. The WPA set up a Task Force to examine the phenomenon as it relates specifically to mental health professionals. This report provides a description of the work of the Task Force and its recommendations in regard to how the WPA might act to help address the issue.	[Gureje, Oye] Univ Ibadan, Dept Psychiat, Ibadan, Nigeria; [Hollins, Sheila] St Georges Univ, Div Mental Hlth, London, England; [Botbol, Michel] Adolescent Hop Neuilly Seine, Paris, France; [Javed, Afzal] Med Ctr, Nuneaton, Warwick, England; [Jorge, Miguel] Univ Fed Sao Paulo, Paulista Sch Med, Clin Psychiat Sect, Sao Paulo, Brazil; [Okech, Violet] Kenyatta Natl Teaching & Referral Hosp, Gender B…	Gureje, O (corresponding author), Univ Ibadan, Dept Psychiat, PMB 5116, Ibadan, Nigeria.		Adewuya, Abiodun/N-4997-2017; Jenkins, Rachel/H-2953-2019; Jenkins, Rachel/E-4287-2010	Adewuya, Abiodun/0000-0002-7611-6953; Jenkins, Rachel/0000-0002-2958-0331; Jenkins, Rachel/0000-0002-2958-0331			Ahmad OB, 2005, BRIT MED J, V331, P43, DOI 10.1136/bmj.331.7507.43; Alem A, 2008, WORLD PSYCHIATRY, V7, P54; Ana JN, 2005, BRIT MED J, V331, P780, DOI 10.1136/bmj.331.7519.780-a; *AUSTR MED WORKF A, 2002, ANN REPORT 2001 2002; Carrington W., 1998, 98102 IMF; Chisholm D, 2007, LANCET, V370, P1241, DOI 10.1016/S0140-6736(07)61242-2; Goldacre Michael J., 2004, BRIT MED J, P329; GOLDBERG D., 2003, NE…	32	30	30	0	2	ELSEVIER MASSON	MILANO	VIA PALEOCAPA 7, 20121 MILANO, ITALY	1723-8617			WORLD PSYCHIATRY	World Psychiatry	JUN	2009	5	8	2
J	Felbermayr, GJ; Jung, B				Felbermayr, Gabriel J.; Jung, Benjamin			The pro-trade effect of the brain drain: Sorting out confounding factors	ECONOMICS LETTERS			English	Article						Gravity model; International trade; International migration		We sort out confounding factors in the empirical link between bilateral migration and trade. Using newly available panel data on developing countries' diaspora to rich OECD nations in a theory-grounded gravity model, we uncover a robust, causal pro-trade effect. Moreover, we do not find evidence in favor of strong differences across education groups. (C) 2009 Elsevier B.V. All rights reserved.	[Felbermayr, Gabriel J.] Univ Hohenheim, Dept Econ, D-70593 Stuttgart, Germany	Felbermayr, GJ (corresponding author), Univ Hohenheim, Dept Econ, Box 520E, D-70593 Stuttgart, Germany.	g.felbermayr@uni-hohenheim.de					Baier SL, 2007, J INT ECON, V71, P72, DOI 10.1016/j.jinteco.2006.02.005; Baldwin R., 2006, 12516 NBER; Baltagi BH, 2003, ECON LETT, V80, P391, DOI 10.1016/S0165-1765(03)00115-0; Bandyopadhyay S, 2008, REV INT ECON, V16, P199, DOI 10.1111/j.1467-9396.2007.00722.x; Beine M, 2008, ECON J, V118, P631, DOI 10.1111/j.1468-0297.2008.02135.x; DOCQUIER F, 2006, 36 IRES; Docquier Frederic, 2006, INT MIGRAT…	14	30	30	1	5	ELSEVIER SCIENCE SA	LAUSANNE	PO BOX 564, 1001 LAUSANNE, SWITZERLAND	0165-1765	1873-7374		ECON LETT	Econ. Lett.	AUG	2009	5	104	2
J	Mountford, A; Rapoport, H				Mountford, Andrew; Rapoport, Hillel			The brain drain and the world distribution of income	JOURNAL OF DEVELOPMENT ECONOMICS			English	Article; Proceedings Paper	Conference on Globalization and the Brain Drain - Theory, Evidence and Policy	DEC 09-11, 2008	Hebrew Univ, Jerusalem, ISRAEL	Bar llan Univ	Hebrew Univ	Migration; Growth; Brain drain; World distribution of income; Endogenous fertility	HUMAN-CAPITAL FORMATION; DISTRIBUTION DYNAMICS; SELF-SELECTION; FERTILITY; MIGRATION; INEQUALITY; QUANTITY; QUALITY; GROWTH; TECHNOLOGY	Skilled emigration (or brain drain) from developing to developed countries is becoming the dominant pattern of international migration today. Such migration is likely to affect the world distribution of income both directly, through the mobility of people, and indirectly, as the prospect of migration affects the rate of return to education in both the sending and receiving economies. This migrati…	[Mountford, Andrew] Univ London, Royal Holloway Coll, Dept Econ, Egham TW20 0EX, Surrey, England; [Rapoport, Hillel] Bar Ilan Univ, Dept Econ, IL-52100 Ramat Gan, Israel; [Rapoport, Hillel] Univ Lille, EQUIPPE, Lille, France; [Rapoport, Hillel] Harvard Univ, Ctr Int Dev, Cambridge, MA 02138 USA	Mountford, A (corresponding author), Univ London, Royal Holloway Coll, Dept Econ, Egham TW20 0EX, Surrey, England.	A.Mountford@rhul.ac.uk; hillel_rapoport@hks.harvard.edu					Anand S, 2008, J ECON LIT, V46, P57, DOI 10.1257/jel.46.1.57; Angrist J, 2010, J LABOR ECON, V28, P773, DOI 10.1086/653830; Barro R. J., 2004, EC GROWTH; BARRO RJ, 1989, ECONOMETRICA, V57, P481, DOI 10.2307/1912563; Basu S, 1998, Q J ECON, V113, P1025, DOI 10.1162/003355398555829; Becker Gary, 1981, TREATISE FAMILY; BECKER GS, 1990, J POLIT ECON, V98, pS12, DOI 10.1086/261723; BECKER GS, 1976, J …	51	30	30	1	27	ELSEVIER	AMSTERDAM	RADARWEG 29, 1043 NX AMSTERDAM, NETHERLANDS	0304-3878	1872-6089		J DEV ECON	J. Dev. Econ.	MAY	2011	5	95	1
J	Kim, D; Bankart, CAS; Isdell, L				Kim, Dongbin; Bankart, Charles A. S.; Isdell, Laura			International doctorates: trends analysis on their decision to stay in US	HIGHER EDUCATION			English	Article						International doctorates; Mobility; Stay and return decision; Trends analysis	FOREIGN-STUDENTS; BRAIN-DRAIN; ADJUSTMENT	Despite the significant implications of the foreign doctorates' stay or return decision on a personal level, as well as for the home and host countries, there is very little research that provides a comprehensive understanding of the factors that predict international doctorates' decision to stay in the US and how those factors differ by country of origin or field of study. In addition, the patte…	[Kim, Dongbin; Bankart, Charles A. S.; Isdell, Laura] Univ Kansas, Lawrence, KS 66045 USA	Kim, D (corresponding author), Univ Kansas, Lawrence, KS 66045 USA.	dbkim@ku.edu					ALTBACH PG, 1991, HIGH EDUC, V21, P305, DOI 10.1007/BF00132723; Anderson C. A., 1963, OLD SOC NEW STATES, P247; Andrade MS, 2006, J RES INT EDUC, V5, P131, DOI 10.1177/1475240906065589; Aslanbeigui N, 1998, J ECON PERSPECT, V12, P171, DOI 10.1257/jep.12.3.171; Barnett GA, 1995, HIGH EDUC, V30, P353, DOI 10.1007/BF01383539; Baruch Y, 2007, J WORLD BUS, V42, P99, DOI 10.1016/j.jwb.2006.11.004; Bert…	52	30	30	0	21	SPRINGER	DORDRECHT	VAN GODEWIJCKSTRAAT 30, 3311 GZ DORDRECHT, NETHERLANDS	0018-1560	1573-174X		HIGH EDUC	High. Educ.	AUG	2011	5	62	2
J	Gamlen, A				Gamlen, Alan			The new migration-and-development pessimism	PROGRESS IN HUMAN GEOGRAPHY			English	Article						circular migration; engaging diasporas; migration and development; neoliberalism; remittances	INTERNATIONAL MIGRATION; BRAIN-DRAIN; LABOR MIGRATION; DEVELOPMENT POLICY; DEVELOPMENT NEXUS; REMITTANCES; ECONOMICS; NETWORKS; MIGRANTS; POLITICS	Human geographers, and collaborators in cognate disciplines, have taken the lead in critiquing a wave of optimistic thinking about the relationship between migration and development that has emerged over the past two decades. This paper reviews and synthesizes recent human geographical and related critiques, arguing that they constitute a 'new migration-and-development pessimism', the main conten…	[Gamlen, Alan] Victoria Univ Wellington, Room 311,Cotton Bldg,Gate 7 Kelburn Pde, Wellington 6012, New Zealand	Gamlen, A (corresponding author), Victoria Univ Wellington, Room 311,Cotton Bldg,Gate 7 Kelburn Pde, Wellington 6012, New Zealand.	alan.gamlen@vuw.ac.nz		Gamlen, Alan John/0000-0003-1432-0526			AGUNIAS DOVELYN RANNVEIG, 2006, ZERO SUM WIN WIN SCE; APPLEYARD RT, 1989, INT MIGR REV, V23, P486, DOI 10.2307/2546425; Bakewell O, 2008, THIRD WORLD Q, V29, P1341, DOI 10.1080/01436590802386492; Basu P., 2005, EMIGRANT HOMECOMINGS, P131; Beine M, 2008, ECON J, V118, P631, DOI 10.1111/j.1468-0297.2008.02135.x; Betts A., 2011, GLOBAL MIGRATION GOV; Bhagwati J., 1974, J DEV ECON, V1, P19, DOI DOI 1…	97	30	31	0	27	SAGE PUBLICATIONS LTD	LONDON	1 OLIVERS YARD, 55 CITY ROAD, LONDON EC1Y 1SP, ENGLAND	0309-1325	1477-0288		PROG HUM GEOG	Prog. Hum. Geogr.	AUG	2014	5	38	4
J	Walton-Roberts, M				Walton-Roberts, Margaret			International migration of health professionals and the marketization and privatization of health education in India: From push-pull to global political economy	SOCIAL SCIENCE & MEDICINE			English	Article						India; Migration; Education; Nursing; Global political economy	BRAIN-DRAIN; DEVELOPING-COUNTRIES; NURSE MIGRATION; WORKERS; CARE; PERSPECTIVE; FUTURE	Health worker migration theories have tended to focus on labour market conditions as principal push or pull factors. The role of education systems in producing internationally oriented health workers has been less explored. In place of the traditional conceptual approaches to understanding health worker, especially nurse, migration, I advocate global political economy (GPE) as a perspective that …	Wilfrid Laurier Univ, Sch Int Policy & Governance, Balsillie Sch Int Affairs, Waterloo, ON N2L 3C5, Canada	Walton-Roberts, M (corresponding author), Wilfrid Laurier Univ, Sch Int Policy & Governance, Balsillie Sch Int Affairs, 67 Erb St Room 216, Waterloo, ON N2L 3C5, Canada.	mwaltonroberts@wlu.ca			Social Sciences and Humanities Research Council of CanadaSocial Sciences and Humanities Research Council of Canada (SSHRC) [410-2010-1013]; Shastri Indo-Canadian Institute; Wilfrid Laurier University	Funding for this research was provided by the Social Sciences and Humanities Research Council of Canada (file #410-2010-1013), Shastri Indo-Canadian Institute and Wilfrid Laurier University. Research collaboration in India was provided by Professor Smita Bhutani and students at the Centre of Advanced Study in Geography, Panjab University Chandigarh, and the Centre for Development Studies and Jith…	Agrawal S., 2013, NORRAG NEWS, V49; [Anonymous], 2010, B WORLD HEALTH ORGAN, V88, P327, DOI 10.2471/BLT.10.020510; [Anonymous], 2008, TIMES INDIA; [Anonymous], 2001, HIGH LEV COMM IND DI; [Anonymous], 2013, P NAT CONS WORKSH FA; [Anonymous], 2014, ENTR EX IND 2014; [Anonymous], 2012, TIMES INDIA; Ansah E. E., 2002, AFRICAN ISSUES, P21; Anupama G. S., 2002, TIMES INDIA; Bastia T, 2014, PROG DEV ST…	81	30	30	1	35	PERGAMON-ELSEVIER SCIENCE LTD	OXFORD	THE BOULEVARD, LANGFORD LANE, KIDLINGTON, OXFORD OX5 1GB, ENGLAND	0277-9536			SOC SCI MED	Soc. Sci. Med.	JAN	2015	6	124
J	Woo, Y; Kim, E; Lim, J				Woo, Youngjin; Kim, Euijune; Lim, Jaewon			The Impact of Education and R&D Investment on Regional Economic Growth	SUSTAINABILITY			English	Article						education and R&D investment; human capital; brain drain; migration; regional economic divergence	HUMAN-CAPITAL ACCUMULATION; QUALITY-OF-LIFE; INCREASING RETURNS; MIGRATION; UNIVERSITY; MOBILITY; POLICY; MODEL	The purpose of this paper is to examine the impact of education and R&D investment on regional economic growth in South Korea. We develop a simultaneous model of production, human capital accumulation, migration, population and physical capital investment of two regions: the Seoul Metropolitan Area and the rest of Korea. We decompose the regional growth path into a quality path and a quantity pat…	[Woo, Youngjin; Kim, Euijune] Seoul Natl Univ, Dept Agr Econ & Rural Dev, Seoul 08826, South Korea; [Lim, Jaewon] Univ Nevada, Greenspun Coll Urban Affairs, Sch Publ Policy & Leadership, Las Vegas, NV 89154 USA	Kim, E (corresponding author), Seoul Natl Univ, Dept Agr Econ & Rural Dev, Seoul 08826, South Korea.	alternative@snu.ac.kr; euijune@snu.ac.kr; jaewon.lim@unlv.edu	Lim, Jaewon/AAL-6804-2020	Kim, Euijune/0000-0003-4354-5150			Acemoglu D, 1996, Q J ECON, V111, P779, DOI 10.2307/2946672; AGHION P, 1992, ECONOMETRICA, V60, P323, DOI 10.2307/2951599; Alston M, 2004, AUST J SOC ISSUES, V39, P299, DOI 10.1002/j.1839-4655.2004.tb01178.x; Anselin L, 2000, GROWTH CHANGE, V31, P501, DOI 10.1111/0017-4815.00142; BARRO RJ, 1991, Q J ECON, V106, P407, DOI 10.2307/2937943; BARRO RJ, 1993, J MONETARY ECON, V32, P363, DOI 10.1016/030…	66	30	30	3	21	MDPI	BASEL	ST ALBAN-ANLAGE 66, CH-4052 BASEL, SWITZERLAND		2071-1050		SUSTAINABILITY-BASEL	Sustainability	MAY	2017	6	9	5
J	Coulombe, S; Tremblay, JF				Coulombe, Serge; Tremblay, Jean-Francois			Migration and Skills Disparities across the Canadian Provinces	REGIONAL STUDIES			English	Article						International immigration; Brain drain; Human capital; Interprovincial migration; Provincial disparities; Skill intensity	IMMIGRANT EARNINGS; GROWTH; EDUCATION; EMPIRICS	This paper compares the skill intensity and schooling of the international immigrant, interprovincial migrant and Canadian-born population using data constructed from the 2003 International Adult Literacy and Skills Survey (IALSS). On average, international immigrants to Canada have more years of schooling but a lower skill level than the Canadian-born population. The mean skill deficiency of the…	[Coulombe, Serge; Tremblay, Jean-Francois] Univ Ottawa, Dept Econ, Ottawa, ON K1N 6N5, Canada	Coulombe, S (corresponding author), Univ Ottawa, Dept Econ, 55 Laurier St E, Ottawa, ON K1N 6N5, Canada.	Serge.Coulombe@uottawa.ca; Jean-Francois.Tremblay@uottawa.ca					Barro R. J., 2004, EC GROWTH; BARRO RJ, 1995, AM ECON REV, V85, P103; Bassanini A, 2002, ECON LETT, V74, P399, DOI 10.1016/S0165-1765(01)00569-9; BENHABIB J, 1994, J MONETARY ECON, V34, P143, DOI 10.1016/0304-3932(94)90047-7; BORJAS GJ, 1987, AM ECON REV, V77, P531; Coulombe S, 2006, INT REGIONAL SCI REV, V29, P199, DOI 10.1177/0160017606286357; Coulombe S, 2003, REG STUD, V37, P239, DOI 10.1080/…	32	29	32	0	16	ROUTLEDGE JOURNALS, TAYLOR & FRANCIS LTD	ABINGDON	4 PARK SQUARE, MILTON PARK, ABINGDON OX14 4RN, OXFORDSHIRE, ENGLAND	0034-3404			REG STUD	Reg. Stud.		2009	5	43	1
J	Berlinschi, R; Schokkaert, J; Swinnen, J				Berlinschi, Ruxanda; Schokkaert, Jeroen; Swinnen, Johan			When drains and gains coincide: Migration and international football performance	LABOUR ECONOMICS			English	Article						Migration; Human capital; International football performance	BRAIN-DRAIN; TECHNOLOGY-TRANSFER; GLOBALIZATION; ECONOMICS; GROWTH; IMPACT; LABOR	We analyze the impact of human capital formation through migration on performance by studying the impact of football players' migration to foreign clubs on their origin countries' international football performance. In our model, migration to foreign clubs allows players to improve their skills. Its impact on national team performance is positive and increasing with the difference in quality betw…	[Berlinschi, Ruxanda; Schokkaert, Jeroen; Swinnen, Johan] Univ Leuven KU Leuven, LICOS Ctr Inst & Econ Performance, B-3000 Louvain, Belgium	Schokkaert, J (corresponding author), Univ Leuven KU Leuven, LICOS Ctr Inst & Econ Performance, Waaistr 6, B-3000 Louvain, Belgium.	ruxanda.berlinschi@econ.kuleuven.be; jeroen.schokkaert@econ.kuleuven.be; jo.swinnen@econ.kuleuven.be	Swinnen, Johan/Z-1435-2019	Berlinschi, Ruxanda/0000-0002-8802-663X; Swinnen, Johan/0000-0002-8650-1978			ADAMS RH, 2003, 3069 WORLD BANK; Alegi Peter, 2010, AFRICAN SOCCERSCAPES; Alvarez J, 2011, LABOUR ECON, V18, P287, DOI 10.1016/j.labeco.2010.11.003; Amuedo-Dorantes C, 2010, WORLD DEV, V38, P1747, DOI 10.1016/j.worlddev.2010.05.008; Andreff W., 2006, NATL SPORT ENJEUX PR, P171; Andreff W, 2004, INT SPORTS EC COMP, P87; Andreff Wladimir, 2009, LABOUR MARKET MIGRAT, V2, P9; Antonioni P., 2000, EURO…	72	29	29	0	33	ELSEVIER	AMSTERDAM	RADARWEG 29, 1043 NX AMSTERDAM, NETHERLANDS	0927-5371	1879-1034		LABOUR ECON	Labour Econ.	APR	2013	5	21
J	Levin, DZ; Barnard, H				Levin, Daniel Z.; Barnard, Helena			Connections to distant knowledge: Interpersonal ties between more- and less-developed countries	JOURNAL OF INTERNATIONAL BUSINESS STUDIES			English	Article						diaspora; economic upgrading; emerging markets/countries/economies; knowledge transfer; long-distance communication; social networks	ECONOMIC-GEOGRAPHY; EMERGING MARKETS; BRAIN-DRAIN; SOCIAL TIES; WEAK TIES; NETWORKS; SPILLOVERS; STRATEGIES; MOBILITY; TRUST	Less-developed countries benefit from being connected to technologically and economically advanced countries. The well-documented mechanisms for this cross-national flow of knowledge all involve interfirm connections, such as trade, foreign direct investment (FDI), and alliances. We examine the potential of a different mechanism interpersonal ties abroad that has only recently become practicable,…	[Levin, Daniel Z.] Rutgers State Univ, Rutgers Business Sch, Management & Global Business Dept, Newark, NJ 07102 USA; [Barnard, Helena] Univ Pretoria, Gordon Inst Business Sci, Sandton, South Africa	Levin, DZ (corresponding author), Rutgers State Univ, Rutgers Business Sch Newark & New Brunswick, Management & Global Business Dept, 1 Washington Pk, Newark, NJ 07102 USA.	levin@business.rutgers.edu; barnardh@gibs.co.za	Barnard, Helena/E-7106-2013	Barnard, Helena/0000-0002-5690-5023			Agrawal A, 2011, J URBAN ECON, V69, P43, DOI 10.1016/j.jue.2010.06.003; Almeida P., 2010, 58 GLOBADVANTAGE CTR; Almeida P, 2011, IND CORP CHANGE, V20, P1571, DOI 10.1093/icc/dtr030; Archibugi D, 2009, TECHNOL FORECAST SOC, V76, P917, DOI 10.1016/j.techfore.2009.01.002; Athreye SS, 2005, IND CORP CHANGE, V14, P393, DOI 10.1093/icc/dth056; Axelsson Bjorn, 2002, CRIT PERSPECT, P437; Barnard H, 2013,…	77	29	29	2	103	PALGRAVE MACMILLAN LTD	BASINGSTOKE	BRUNEL RD BLDG, HOUNDMILLS, BASINGSTOKE RG21 6XS, HANTS, ENGLAND	0047-2506	1478-6990		J INT BUS STUD	J. Int. Bus. Stud.	SEP	2013	5	44	7
J	Oosterbeek, H; Webbink, D				Oosterbeek, Hessel; Webbink, Dinand			Does Studying Abroad Induce a Brain Drain?	ECONOMICA			English	Article							HUMAN-CAPITAL FORMATION; IDENTIFICATION; GROWTH	This paper investigates whether studying abroad increases the propensity to live abroad later on. We use an instrumental variable approach based on cut-offs in the ranking of Dutch higher education graduates who applied for a scholarship programme for outstanding students. Applicants ranked above the cut-off received a scholarship to study abroad. Applicants ranked below the cut-off were denied a…	[Oosterbeek, Hessel] Univ Amsterdam, Sch Econ, NL-1012 WX Amsterdam, Netherlands; [Oosterbeek, Hessel] Tinbergen Inst, Amsterdam, Netherlands; [Webbink, Dinand] CPB Netherlands Bur Econ Policy Anal, The Hague, Netherlands	Oosterbeek, H (corresponding author), Univ Amsterdam, Sch Econ, NL-1012 WX Amsterdam, Netherlands.						Angrist JD, 2001, J ECON PERSPECT, V15, P69, DOI 10.1257/jep.15.4.69; Beine M, 2001, J DEV ECON, V64, P275, DOI 10.1016/S0304-3878(00)00133-4; Beine M, 2008, ECON J, V118, P631, DOI 10.1111/j.1468-0297.2008.02135.x; Bhagwati J., 1974, J DEV ECON, V1, P19, DOI DOI 10.1016/0304-3878(74)90020-0; CAMPBELL DT, 1969, AM PSYCHOL, V24, P409, DOI 10.1037/h0027982; Docquier F., 2007, 2873 IZA; Dos Santos M…	22	28	28	0	12	WILEY-BLACKWELL	MALDEN	COMMERCE PLACE, 350 MAIN ST, MALDEN 02148, MA USA	0013-0427			ECONOMICA	Economica	APR	2011	5	78	310
J	Okeke, EN				Okeke, Edward N.			Brain drain: Do economic conditions "push" doctors out of developing countries?	SOCIAL SCIENCE & MEDICINE			English	Article						Sub-Saharan Africa; Migration; Physicians	INTERNATIONAL MIGRATION; HEALTH-PROFESSIONALS; PHYSICIAN MIGRATION; MEDICAL MIGRATION; WEAK INSTRUMENTS; UNITED-STATES; GROWTH; CONFLICT; TRENDS; SHOCKS	Health worker migration is an issue of first order concern in global health policy circles and continues to be the subject of much policy debate. In this paper, we contribute to the discussion by studying the impact of economic conditions on the migration of physicians from developing countries. To our knowledge, this is one of the first papers to do so. A major contribution of this paper is the …	RAND Corp, Pittsburgh, PA 15213 USA	Okeke, EN (corresponding author), RAND Corp, 4570 5th Ave, Pittsburgh, PA 15213 USA.	eokeke@rand.org					Arah OA, 2008, AM J PUBLIC HEALTH, V98, P148, DOI 10.2105/AJPH.2006.095844; Arah OA, 2007, BMC PUBLIC HEALTH, V7, DOI 10.1186/1471-2458-7-83; Astor A, 2005, SOC SCI MED, V61, P2492, DOI 10.1016/j.socscimed.2005.05.003; Awases M, 2004, MIGRATION HLTH PROFE; Becker CM, 2005, J COMP ECON, V33, P107, DOI 10.1016/j.jce.2004.12.003; Bhargava A., 2007, WORKING PAPER; Bhargava A, 2008, WORLD BANK ECON RE…	58	27	27	1	26	PERGAMON-ELSEVIER SCIENCE LTD	OXFORD	THE BOULEVARD, LANGFORD LANE, KIDLINGTON, OXFORD OX5 1GB, ENGLAND	0277-9536			SOC SCI MED	Soc. Sci. Med.	DEC	2013	5	98
J	Pillay, AL; Kramer, AL				Pillay, AL; Kramer, AL			Clinical psychology's contribution to employment inequity and the "brain drain" in South Africa	SOUTH AFRICAN JOURNAL OF PSYCHOLOGY			English	Article							MENTAL-HEALTH-SERVICES; INTERNSHIP	The current study investigated race, gender and the "brain drain" in the Midlands Hospital (Pietermaritzburg) intern clinical psychology training programme. During the 20-year period between 1981 and 2000 a total of 128 interns were accepted into the programme. Almost three-quarters of the interns were White, and the majority of the sample was unskilled in the predominant language spoken in the r…	Univ KwaZulu Natal, Nelson R Mandela Sch Med, Dept Med Appl Psychol, ZA-3200 Pietermaritzburg, South Africa; Midlands Hosp, ZA-3200 Pietermaritzburg, South Africa	Pillay, AL (corresponding author), Univ KwaZulu Natal, Nelson R Mandela Sch Med, Dept Med Appl Psychol, POB 370, ZA-3200 Pietermaritzburg, South Africa.	h993768@dohho.kzntl.gov.za					[Anonymous], 1979, AM J PSYCHIAT, V136, P1498; BADAT S, 2002, SUNDAY TIMES 0602, P17; Bartle DD, 1999, PROF PSYCHOL-RES PR, V30, P420; BERKOWITZ B, 2001, NATAL WITNESS 0212, P9; Cherry DK, 2000, PROF PSYCHOL-RES PR, V31, P562, DOI 10.1037/0735-7028.31.5.562; COOPER S, 1990, PSYCHOL APARTHEID, P1; DAWES A, 1985, South African Journal of Psychology, V15, P55; DELAREY C, 1997, MENTAL HLTH POLICY I, …	48	26	27	0	0	SAGE PUBLICATIONS LTD	LONDON	1 OLIVERS YARD, 55 CITY ROAD, LONDON EC1Y 1SP, ENGLAND	0081-2463	2078-208X		S AFR J PSYCHOL	South Afr. J. Psychol.	MAR	2003	4	33	1
J	Lianos, TP; Asteriou, D; Agiomirgianakis, GM				Lianos, TP; Asteriou, D; Agiomirgianakis, GM			Foreign university graduates in the Greek labour market: Employment, salaries and overeducation	INTERNATIONAL JOURNAL OF FINANCE & ECONOMICS			English	Article; Proceedings Paper	International Conference on Overeducation in Europe - What Do We Know	NOV 22-23, 2002	BERLIN, GERMANY			education; international labour mobility		Greece is ranked among the first countries of the world in terms of student migration, while compared with other EU countries Greece has the highest number of students studying in other member states. Although the issue of migrating Greek students is constantly analysed in the newspapers, and often in relation to the educational policy adopted in Greece,(1) most of the academic literature (Kanell…	Hellen Open Univ, Patras 26222, Greece; City Univ London, London EC1V 0HB, England; Athens Univ Econ & Business, Athens, Greece	Agiomirgianakis, GM (corresponding author), Hellen Open Univ, Patras 26222, Greece.	gmagios@eap.gr	Agiomirgianakis, George M/P-8246-2018; Asteriou, Dimitrios/K-8871-2019	Agiomirgianakis, George M/0000-0003-4977-2178; Asteriou, Dimitrios/0000-0001-7640-6507			ALBARAMIREZ A, 1992, J HUM RESOUR, P259; ALBARAMIREZ A, 2002, INT C OV EUR WHAT DO; ALIPRANTI LM, 2002, POPULATION ED GREECE; Allen J, 2001, OXFORD ECON PAP, V53, P434, DOI 10.1093/oep/53.3.434; BATU H, 1999, ED EC, V7, P21; BOSWORTH D, 1996, EC LABOUR MARKET; Dolton P, 2000, ECON EDUC REV, V19, P179, DOI 10.1016/S0272-7757(97)00036-8; Dolton P., 2001, OVER ED GRADUATE LAB; DRETAKIS E, 2001, KATH…	23	26	27	0	14	WILEY	HOBOKEN	111 RIVER ST, HOBOKEN 07030-5774, NJ USA	1076-9307	1099-1158		INT J FINANC ECON	Int. J. Financ. Econ.	APR	2004	4	9	2
J	Rogers, ML				Rogers, Mark Llewellyn			Directly unproductive schooling: How country characteristics affect the impact of schooling on growth	EUROPEAN ECONOMIC REVIEW			English	Article						schooling; human capital; corruption; brain drain; economic growth	ECONOMIC-GROWTH; EDUCATION	The rapid rise in schooling in developing countries in recent decades has been dramatic. However, many cross-country regression analyses of the impact of schooling on economic growth find low and insignificant coefficients. This empirical 'puzzle' contrasts with theoretical arguments that schooling, through raising human capital, should raise income levels. This paper argues that poor results are…	Harris Manchester Coll, Oxford OX1 3TD, England	Rogers, ML (corresponding author), Harris Manchester Coll, Mansfield Rd, Oxford OX1 3TD, England.	mark.rogers@hmc.ox.ac.uk					BAIER SL, 2005, ECON INQ, V44, P23; BARRO RJ, 1991, Q J ECON, V106, P407, DOI 10.2307/2937943; BARRO RJ, 1993, J MONETARY ECON, V32, P363, DOI 10.1016/0304-3932(93)90023-9; Barro RJ, 2001, AM ECON REV, V91, P12, DOI 10.1257/aer.91.2.12; Barro RJ, 2001, OXFORD ECON PAP, V53, P541, DOI 10.1093/oep/53.3.541; BECKER GS, 1990, J POLIT ECON, V98, pS12, DOI 10.1086/261723; Beine M, 2001, J DEV ECON, V64…	50	26	27	0	5	ELSEVIER	AMSTERDAM	RADARWEG 29, 1043 NX AMSTERDAM, NETHERLANDS	0014-2921	1873-572X		EUR ECON REV	Eur. Econ. Rev.	FEB	2008	5	52	2
J	Desai, MA; Kapur, D; McHale, J; Rogers, K				Desai, Mihir A.; Kapur, Devesh; McHale, John; Rogers, Keith			The fiscal impact of high-skilled emigration: Flows of Indians to the US	JOURNAL OF DEVELOPMENT ECONOMICS			English	Article						Emigration; Immigration; Human capital; Fiscal; Skill; India; United States	INCOME TAXATION; BRAIN-DRAIN; MIGRATION; IMMIGRATION; GROWTH; WAGES	What are the fiscal consequences of high-skilled emigration for source countries? This paper develops methodologies for inferring these consequences and applies them to the recent sizable emigration of high-skilled workers from India to the U.S. This wave of emigration from India to the U.S. is shown to be unusually concentrated amongst the prime-age work force, the highly educated and high carri…	[McHale, John; Rogers, Keith] Queens Univ, Kingston, ON K7L 3N6, Canada; [Desai, Mihir A.] Harvard Univ, Sch Business, Boston, MA 02163 USA; [Kapur, Devesh] Univ Penn, Philadelphia, PA 19104 USA	McHale, J (corresponding author), Queens Univ, Goodes Hall 328,Union St, Kingston, ON K7L 3N6, Canada.	mdesai@hbs.edu; dkapur@upenn.sas; jmchale@business.queensu.ca; krogers@business.queensu.ca					ADAMS RH, 2003, 3069 WORLD BANK; ALTONJI JG, 1991, IMMIGRATION TRADE LA; Barrett A., 2001, ECON SOC REV, V32, P1; Beine M, 2001, J DEV ECON, V64, P275, DOI 10.1016/S0304-3878(00)00133-4; BEINE M, EC J IN PRESS; BHAGWATI J, 1976, BRAIN DRAIN TAXATION; Bhagwati J.N., 1989, INCOME TAXATION INT; BHAGWATI JN, 1998, J BHAGWATI POLITICAL; BHATTACHARJEE D, 2001, ECON POLIT WEEKLY, V36, P46; Borjas GJ, 19…	37	26	26	0	15	ELSEVIER SCIENCE BV	AMSTERDAM	PO BOX 211, 1000 AE AMSTERDAM, NETHERLANDS	0304-3878			J DEV ECON	J. Dev. Econ.	JAN	2009	5	88	1
J	Elsner, B				Elsner, Benjamin			Emigration and wages: The EU enlargement experiment	JOURNAL OF INTERNATIONAL ECONOMICS			English	Article						Emigration; EU enlargement; European integration; Wage distribution	LABOR-MARKET; BRAIN-DRAIN; US STATES; IMMIGRATION; IMPACT; ADJUSTMENT; MEXICO; MEN; 1ST	The enlargement of the European Union provides a unique opportunity to study the impact of the lifting of migration restrictions on the migrant sending countries. With EU enlargement in 2004, 1.2 million workers from Eastern Europe emigrated to the UK and Ireland. I use this emigration wave to show that emigration significantly changed the wage distribution in the sending country, in particular b…		Elsner, B (corresponding author), Schaumburg Lippe Str 5-9, D-53113 Bonn, Germany.	elsner@iza.org					Algan Y, 2010, ECON J, V120, pF4, DOI 10.1111/j.1468-0297.2009.02338.x; Angrist JD, 2009, MOSTLY HARMLESS ECONOMETRICS: AN EMPIRICISTS COMPANION, P1; Aydemir A, 2007, J EUR ECON ASSOC, V5, P663, DOI 10.1162/JEEA.2007.5.4.663; Aydemir A, 2011, J LABOR ECON, V29, P69, DOI 10.1086/656360; Borjas GJ, 2003, Q J ECON, V118, P1335, DOI 10.1162/003355303322552810; BORJAS GJ, 1995, AM ECON REV, V85, P365;…	33	26	26	2	42	ELSEVIER SCIENCE BV	AMSTERDAM	PO BOX 211, 1000 AE AMSTERDAM, NETHERLANDS	0022-1996			J INT ECON	J. Int. Econ.	SEP	2013	5	91	1
J	Ghani, E; Kerr, WR; Stanton, C				Ghani, Ejaz; Kerr, William R.; Stanton, Christopher			Diasporas and Outsourcing: Evidence from oDesk and India	MANAGEMENT SCIENCE			English	Article						diaspora; ethnicity; outsourcing; oDesk; networks; India; South Asia	INTERNATIONAL TECHNOLOGY DIFFUSION; SOFTWARE INDUSTRY; SOCIAL NETWORKS; LABOR MOBILITY; BRAIN-DRAIN; TRADE; US; MARKET; FLOWS; IMMIGRATION	We examine the role of the Indian diaspora in the outsourcing of work to India. Our data are taken from oDesk, the world's largest online platform for outsourced contracts. Despite oDesk minimizing many of the frictions that diaspora connections have traditionally overcome, diaspora connections still matter on oDesk, with ethnic Indians substantially more likely to choose a worker in India. This …	[Ghani, Ejaz] World Bank, Washington, DC 20433 USA; [Kerr, William R.] Harvard Univ, Sch Business, Boston, MA 02163 USA; [Kerr, William R.] Bank Finland, Helsinki 00101, Finland; [Kerr, William R.] Natl Bur Econ Res, Cambridge, MA 02138 USA; [Stanton, Christopher] Univ Utah, Dept Finance, Salt Lake City, UT 84112 USA	Ghani, E (corresponding author), World Bank, 1818 H St NW, Washington, DC 20433 USA.	eghani@worldbank.org; wkerr@hbs.edu; christopher.stanton@business.utah.edu			World BankThe World Bank India; Multi-Donor Trade Trust Fund	The authors thank three extremely helpful anonymous referees, the associate editor, Mihir Desai, John Horton, Francine Lafontaine, Ed Lazear, Ramana Nanda, Paul Oyer, Kathryn Shaw, and seminar participants for helpful comments on this work. Funding for this project was provided by the World Bank and Multi-Donor Trade Trust Fund. William R. Kerr and Christopher Stanton were short-term consultants …	Agrawal A, 2012, 16820 NBER; Agrawal A., 2012, WORKING PAPER; Agrawal A, 2006, J ECON GEOGR, V6, P571, DOI 10.1093/jeg/lbl016; Agrawal A, 2011, J URBAN ECON, V69, P43, DOI 10.1016/j.jue.2010.06.003; ALTONJI J, 1999, HDB LABOR EC C, V3, P3143, DOI DOI 10.1016/S1573-4463(99)30039-0; Amiti M, 2009, WORLD ECON, V32, P203, DOI 10.1111/j.1467-9701.2008.01149.x; Arora A, 2005, UNDERDOGS TIGERS RIS; Aube…	78	26	26	2	51	INFORMS	CATONSVILLE	5521 RESEARCH PARK DR, SUITE 200, CATONSVILLE, MD 21228 USA	0025-1909	1526-5501		MANAGE SCI	Manage. Sci.	JUL	2014	5	60	7
J	Clemens, MA; Ozden, C; Rapoport, H				Clemens, Michael A.; Oezden, Caglar; Rapoport, Hillel			Migration and Development Research is Moving Far Beyond Remittances	WORLD DEVELOPMENT			English	Article						migration; development; diaspora; remittances; brain drain; poverty	BRAIN-DRAIN	Research on migration and development has recently changed, in two ways. First, it has grown sharply in volume, emerging as a proper subfield. Second, while it once embraced principally rural urban migration and international remittances, migration and development research has broadened to consider a range of international development processes. These include human capital investment, global dias…	[Clemens, Michael A.] Ctr Global Dev, Washington, DC 20036 USA; [Oezden, Caglar] World Bank, Washington, DC 20433 USA; [Rapoport, Hillel] Paris Sch Econ, Paris, France; [Rapoport, Hillel] Univ Paris 01, F-75231 Paris 05, France; [Rapoport, Hillel] Bar Ilan Univ, Ramat Gan, Israel	Clemens, MA (corresponding author), Ctr Global Dev, Washington, DC 20036 USA.						Artuc E., 2014, WORLD DEV IN PRESS; Beine M, 2007, WORLD BANK ECON REV, V21, P249, DOI 10.1093/wber/lhm007; Beine M, 2013, CAN J ECON, V46, P1406, DOI 10.1111/caje.12062; Bertoli S., 2014, WORLD DEV IN PRESS; Bhagwati J., 1974, J DEV ECON, V1, P19, DOI DOI 10.1016/0304-3878(74)90020-0; Cortes P., 2014, WORLD DEV IN PRESS; Djajic S., 2014, WORLD DEV IN PRESS; Docquier F., 1999, ECON INTEGRATION, V…	25	26	27	2	54	PERGAMON-ELSEVIER SCIENCE LTD	OXFORD	THE BOULEVARD, LANGFORD LANE, KIDLINGTON, OXFORD OX5 1GB, ENGLAND	0305-750X			WORLD DEV	World Dev.	DEC	2014	5	64
J	Drabo, A; Mbaye, LM				Drabo, Alassane; Mbaye, Linguere Mously			Natural disasters, migration and education: an empirical analysis in developing countries	ENVIRONMENT AND DEVELOPMENT ECONOMICS			English	Article							BRAIN-DRAIN; SELF-SELECTION; INTERNATIONAL MIGRATION; CLIMATIC-CHANGE; DETERMINANTS; DEGRADATION; MIGRANTS; DROUGHT; MEXICO	This paper aims to assess the effect of natural disasters closely related to climate change on migration rates in developing countries, observing how this effect varies according to the level of education. We investigate this relationship by using panel data that measure international migration from developing countries to the main OECD destination countries. Estimations are made with a pair-coun…	[Drabo, Alassane] FERDI, Clermont Ferrand, France; [Mbaye, Linguere Mously] Inst Study Labor IZA, D-53113 Bonn, Germany	Drabo, A (corresponding author), FERDI, Clermont Ferrand, France.	alassanedrabo@hotmail.com; mbaye@iza.org		Mbaye, Linguere Mously/0000-0002-1282-8054	FERDI (Fondation pour les Etudes et Recherches sur le Developpement International); program 'Investissement d'Avenir' of the French government [ANR-10-LABX-14-01]	Part of this research project was done when the authors were PhD students at CERDI, University of Auvergne. This paper benefited from the financial support of the FERDI (Fondation pour les Etudes et Recherches sur le Developpement International) and of the program 'Investissement d'Avenir' (reference ANR-10-LABX-14-01) of the French government. This paper was presented at the 17th Annual Internat…	Barnett J., 2002, GLOBAL CHANGE, V7, P3; Barrios S, 2006, J URBAN ECON, V60, P357, DOI 10.1016/j.jue.2006.04.005; Batista C, 2012, J DEV ECON, V97, P32, DOI 10.1016/j.jdeveco.2011.01.005; Beine M, 2001, J DEV ECON, V64, P275, DOI 10.1016/S0304-3878(00)00133-4; Beine M., 2012, 20122 IRES U CATH LO; Beine M, 2008, ECON J, V118, P631, DOI 10.1111/j.1468-0297.2008.02135.x; Belot MVK, 2012, SCAND J EC…	54	26	27	0	26	CAMBRIDGE UNIV PRESS	NEW YORK	32 AVENUE OF THE AMERICAS, NEW YORK, NY 10013-2473 USA	1355-770X	1469-4395		ENVIRON DEV ECON	Environ. Dev. Econ.	DEC	2015	6	20	6
J	Mariani, F				Mariani, Fabio			Migration as an antidote to rent-seeking?	JOURNAL OF DEVELOPMENT ECONOMICS			English	Article						rent-seeking; skilled migration	BRAIN-DRAIN; GROWTH; ALLOCATION; CORRUPTION; TALENT	We develop a new mechanism through which skilled migration may influence economic performance in the sending country. If agents can choose between acting as rent-seekers and engaging in productive activities, and only productive skills are exportable, a positive probability of migration (to a more secure economy) reduces the relative expected returns from rent-seeking, thus decreasing the proport…	Univ Paris 01, CES, F-75647 Paris 13, France; IZA, Bonn, Germany	Mariani, F (corresponding author), Univ Paris 01, CES, 106-112 Blvd Hop, F-75647 Paris 13, France.	fabio.mariani@univ-parisl.fr					ACEMOGLU D, 1995, EUR ECON REV, V39, P17, DOI 10.1016/0014-2921(94)00014-Q; Baland JM, 2000, J DEV ECON, V61, P527, DOI 10.1016/S0304-3878(00)00067-5; Bardhan P, 1997, J ECON LIT, V35, P1320; BAUMOL WJ, 1990, J POLIT ECON, V98, P893, DOI 10.1086/261712; Beine M, 2001, J DEV ECON, V64, P275, DOI 10.1016/S0304-3878(00)00133-4; Bhagwati J., 1974, J DEV ECON, V1, P19, DOI DOI 10.1016/0304-3878(74)900…	19	25	25	0	4	ELSEVIER	AMSTERDAM	RADARWEG 29, 1043 NX AMSTERDAM, NETHERLANDS	0304-3878	1872-6089		J DEV ECON	J. Dev. Econ.	NOV	2007	5	84	2
J	Wadhwa, V				Wadhwa, Vivek			A Reverse Brain Drain	ISSUES IN SCIENCE AND TECHNOLOGY			English	Article									[Wadhwa, Vivek] Duke Univ, Pratt Sch Engn, Durham, NC 27706 USA	Wadhwa, V (corresponding author), Duke Univ, Pratt Sch Engn, Durham, NC 27706 USA.	vivek@wadhwa.com					Jasso G, 2000, DEMOGRAPHY, V37, P127, DOI 10.2307/2648101; SAXENIAN A, 2009, SILICON VALLEY NEW I; Saxenian AnnaLee, 2007, NEW ARGONAUTS REGION; Wadhwa V, 2007, AM NEW IMMIGRANT E 1; Wadhwa V., 2007, ISSUES SCI TECHNOLOG; Wadhwa V., 2007, ED ENTREPRENEURSHI 2; WADHWA V, 2007, INTELLECTUAL PROP 3	7	25	25	0	12	NATL ACAD SCIENCES	WASHINGTON	2101 CONSTITUTION AVE NW, WASHINGTON, DC 20418 USA	0748-5492			ISSUES SCI TECHNOL	Issues Sci. Technol.	SPR	2009	5	25	3
J	Hospers, GJ				Hospers, Gert-Jan			PLACE MARKETING IN SHRINKING EUROPE: SOME GEOGRAPHICAL NOTES	TIJDSCHRIFT VOOR ECONOMISCHE EN SOCIALE GEOGRAFIE			English	Article						demographic shrinkage; place marketing; Europe; periphery	CITY; LOCATION	One third of Europe's regions is confronted with a shrinking population: they are losing inhabitants due to ageing, low fertility and brain drain. To turn the tide, many local authorities invest in place marketing aimed at attracting new residents and firms. This paper deals with the question as to how useful place marketing to beat demographic shrinkage really is. Theoretical and empirical insig…	[Hospers, Gert-Jan] Radboud Univ Nijmegen, Inst Management Res, NL-7500 AE Enschede, Netherlands; [Hospers, Gert-Jan] Univ Twente, Inst Innovat & Governance Studies, NL-7500 AE Enschede, Netherlands	Hospers, GJ (corresponding author), Radboud Univ Nijmegen, Inst Management Res, POB 217, NL-7500 AE Enschede, Netherlands.	g.j.hospers@utwente.nl					Anholt S., 2007, COMPETITIVE IDENTITY; Braun E., 2008, THESIS ERASMUS U ROT; Dahl MS, 2010, J URBAN ECON, V67, P33, DOI 10.1016/j.jue.2009.09.009; DAVANZO J, 1981, POPUL ENVIRON, V4, P45, DOI 10.1007/BF01362575; DORMANS S, 2008, THESIS RADBOUD U NIJ; Feijten P., 2005, BEVOLKINGSTRENDS, V53, P75; Hankinson G., 2004, Journal of Vacation Marketing, V10, P109, DOI 10.1177/135676670401000202; Hospers …	27	25	25	1	15	WILEY	HOBOKEN	111 RIVER ST, HOBOKEN 07030-5774, NJ USA	0040-747X	1467-9663		TIJDSCHR ECON SOC GE	Tijdschr. Econ. Soc. Geogr.		2011	5	102	3
J	Lemarchand, GA				Lemarchand, Guillermo A.			The long-term dynamics of co-authorship scientific networks: Iberoamerican countries (1973-2010)	RESEARCH POLICY			English	Article						Co-authorship networks; Self-organization; Iberoamerican; Long-term dynamics; Preferential attachment	INTERNATIONAL COLLABORATION; COMPLEX NETWORKS; SELF-ORGANIZATION; LATIN-AMERICA; SCIENCE; COOPERATION; INDICATORS; EVOLUTION	We analyse the national production of academic knowledge in all Iberoamerican and Caribbean countries between 1973 and 2010. We show that the total number of citable scientific publications listed in the Science Citation Index (SCI), the Social Science Citation Index (SSCI) and Arts and Humanities Citation Index (A&HCI) follow an exponential growth, the same as their national productivity (number…	UNESCO, Div Sci Policy & Capac Bldg, F-75732 Paris, France	Lemarchand, GA (corresponding author), UNESCO, Div Sci Policy & Capac Bldg, 1 Rue Miollis, F-75732 Paris, France.	galemarchand@gmail.com	Lemarchand, Guillermo A./AAI-6555-2020				Albert R, 2002, REV MOD PHYS, V74, P47, DOI 10.1103/RevModPhys.74.47; Barabasi AL, 2002, PHYSICA A, V311, P590, DOI 10.1016/S0378-4371(02)00736-7; Barabasi AL, 1999, SCIENCE, V286, P509, DOI 10.1126/science.286.5439.509; BASSARSKY L, 2007, ANUARIO ESTUDIOS AM, V64, P141; Beaver D. deB., 1978, Scientometrics, V1, P65, DOI 10.1007/BF02016840; BEAVER DD, 1979, SCIENTOMETRICS, V1, P231, DOI 10.1007/B…	51	25	27	2	71	ELSEVIER SCIENCE BV	AMSTERDAM	PO BOX 211, 1000 AE AMSTERDAM, NETHERLANDS	0048-7333			RES POLICY	Res. Policy	MAR	2012	5	41	2
J	Bailey, N; Mandeville, KL; Rhodes, T; Mipando, M; Muula, AS				Bailey, Nicola; Mandeville, Kate L.; Rhodes, Tim; Mipando, Mwapatsa; Muula, Adamson S.			Postgraduate career intentions of medical students and recent graduates in Malawi: a qualitative interview study	BMC MEDICAL EDUCATION			English	Article						Doctors; Medical students; Postgraduate education; Specialisation; Malawi; Rural health; Brain drain; Emigration	BRAIN-DRAIN; HEALTH-CARE; DOCTORS; MIGRATE; CHOICES	Background: In 2004, the Malawian Ministry of Health declared a human resource crisis and launched a six year Emergency Human Resources Programme. This included salary supplements for key health workers and a tripling of doctors in training. By 2010, the number of medical graduates had doubled and significantly more doctors were working in rural district hospitals. Yet there has been little resea…	[Bailey, Nicola] St Georges Univ London, Fac Hlth & Social Care Sci, London SW17 ORE, England; [Bailey, Nicola] Kingston Univ, London SW17 ORE, England; [Mandeville, Kate L.; Rhodes, Tim] London Sch Hyg & Trop Med, Fac Publ Hlth & Policy, London WC1H 9SH, England; [Mipando, Mwapatsa] Univ Malawi, Coll Med, Dept Physiol, Blantyre 3, Chichiri, Malawi; [Muula, Adamson S.] Univ Malawi, Coll Med, Dept…	Bailey, N (corresponding author), St Georges Univ London, Fac Hlth & Social Care Sci, London SW17 ORE, England.	nicki.bailey83@gmail.com	Muula, Adamson/AAF-1153-2020	Muula, Adamson/0000-0003-4412-9773; Mandeville, Kate/0000-0002-5525-1574; Rhodes, Tim/0000-0003-2400-9838			[Anonymous], 2011, GLOB HLTH OBS DAT; [Anonymous], 2010, CLIN DIR ACH 2004 20, P2010; BANDURA A, 1982, AM PSYCHOL, V37, P122, DOI 10.1037/0003-066X.37.2.122; Bezuidenhout MM, 2009, S AFR FAM PRACT, V51, P211, DOI 10.1080/20786204.2009.10873850; Broadhead RL, 2002, BMJ-BRIT MED J, V325, P384, DOI 10.1136/bmj.325.7360.384; Couper ID, 2007, SAMJ S AFR MED J, V97, P1082; Dambisya Yoswa, 2003, Educ He…	27	25	25	1	25	BMC	LONDON	CAMPUS, 4 CRINAN ST, LONDON N1 9XW, ENGLAND	1472-6920			BMC MED EDUC	BMC Med. Educ.	41883	2012	5	12
J	Bettin, G; Lucchetti, R; Zazzaro, A				Bettin, Giulia; Lucchetti, Riccardo; Zazzaro, Alberto			Endogeneity and sample selection in a model for remittances	JOURNAL OF DEVELOPMENT ECONOMICS			English	Article						Remittances; Migration; Selection models	INTERNATIONAL MIGRATION; SEMIPARAMETRIC ESTIMATION; EMPIRICAL-EVIDENCE; BRAIN-DRAIN; MIGRANTS; SAVINGS; SPECIFICATION; INVESTMENT; IMMIGRANTS; INSURANCE	We estimate a remittance model in which we address endogeneity and reverse causality relationships between immigrants' remittances, pre-transfer income and consumption. In order to take into account the fact that a large share of individuals do not remit, instrumental variable variants of the double-hurdle and Heckit selection models are proposed and estimated by Limited Information ML; semiparam…	[Bettin, Giulia; Lucchetti, Riccardo; Zazzaro, Alberto] Univ Politecn Marche, Dipartimento Sci Econ & Sociali, I-60121 Ancona, Italy; [Zazzaro, Alberto] Univ Politecn Marche, Money & Finance Res Grp MoFiR, I-60121 Ancona, Italy	Lucchetti, R (corresponding author), Univ Politecn Marche, Dipartimento Sci Econ & Sociali, Ple Martelli 8, I-60121 Ancona, Italy.	g.bettin@univpm.it; r.lucchetti@univpm.it; a.zazzaro@univpm.it	Lucchetti, Riccardo/O-9754-2015	Lucchetti, Riccardo/0000-0002-0401-3445			Agarwal R, 2002, WORLD DEV, V30, P2033, DOI 10.1016/S0305-750X(02)00118-3; AHN H, 1993, J ECONOMETRICS, V58, P3, DOI 10.1016/0304-4076(93)90111-H; Amemiya T., 1985, ADV ECONOMETRICS; Amuedo-Dorantes C, 2006, J POPUL ECON, V19, P227, DOI 10.1007/s00148-006-0079-6; Andrews D. W., 2005, NBER TECHNICAL WORKI, V0313; Aycinena D., 2010, IMPACT REMITTANCE FE; Bauer T, 2005, J POPUL ECON, V18, P649, DOI …	58	25	25	0	29	ELSEVIER	AMSTERDAM	RADARWEG 29, 1043 NX AMSTERDAM, NETHERLANDS	0304-3878	1872-6089		J DEV ECON	J. Dev. Econ.	NOV	2012	5	99	2
J	Gibson, J; McKenzie, D				Gibson, John; McKenzie, David			Scientific mobility and knowledge networks in high emigration countries: Evidence from the Pacific	RESEARCH POLICY			English	Article						Brain circulation; Diasporas; Knowledge networks; Scientific mobility	BRAIN-DRAIN; PROFESSIONALS; COMMUNITIES; MIGRATION	This paper uses a unique survey to examine the nature and extent of knowledge flows that result from the international mobility of researchers whose initial education was in small island countries. Current migrants produce substantially more research than similar-skilled return migrants and non-migrants. Return migrants have no greater research impact than individuals who never migrate but are th…	[Gibson, John] Univ Waikato, Dept Econ, Hamilton, New Zealand; [McKenzie, David] World Bank, Dev Res Grp, Washington, DC 20433 USA	Gibson, J (corresponding author), Univ Waikato, Dept Econ, Private Bag 3105, Hamilton, New Zealand.	jkgibson@waikato.ac.nz; dmckenzie@worldbank.org	Gibson, John/AAM-6159-2020	Gibson, John/0000-0003-3886-6873			Agrawal A, 2011, J URBAN ECON, V69, P43, DOI 10.1016/j.jue.2010.06.003; Ali S., 2007, WARWICK EC RES PAPER, V825; Anas MUM, 2010, SCI PUBL POLICY, V37, P381, DOI 10.3152/030234210X501199; Baruffaldi SH, 2012, RES POLICY, V41, P1655, DOI 10.1016/j.respol.2012.04.005; Ben-David D, 2009, CONTEMP ECON POLICY, V27, P363, DOI 10.1111/j.1465-7287.2008.00141.x; Bhagwati J., 1974, J DEV ECON, V1, P19, DOI…	41	25	27	0	55	ELSEVIER	AMSTERDAM	RADARWEG 29, 1043 NX AMSTERDAM, NETHERLANDS	0048-7333	1873-7625		RES POLICY	Res. Policy	NOV	2014	5	43	9
J	Liu, Y; Shen, JF; Xu, W; Wang, GX				Liu, Ye; Shen, Jianfa; Xu, Wei; Wang, Guixin			From school to university to work: migration of highly educated youths in China	ANNALS OF REGIONAL SCIENCE			English	Article							GRADUATE MIGRATION; REGIONAL-DEVELOPMENT; MOBILITY; AUSTRALIA	A burgeoning body of the literature has studied the migration of university-bound students and university graduates in developed countries, but little research has been conducted on this issue in China. Using microdata from the 2005 1 % population sample survey, this paper examines, for the first time, the migration of university entrants and graduates in China by describing their migration patte…	[Liu, Ye; Shen, Jianfa] Chinese Univ Hong Kong, Dept Geog & Resource Management, Shatin, Hong Kong, Peoples R China; [Liu, Ye] Chinese Univ Hong Kong, Shenzhen Res Inst, Shenzhen 518057, Peoples R China; [Xu, Wei] Univ Lethbridge, Dept Geog, Lethbridge, AB T1K 3M4, Canada; [Xu, Wei] East China Normal Univ, Ctr Modern Chinese City Studies, Shanghai, Peoples R China; [Wang, Guixin] Fudan Univ, Inst…	Liu, Y (corresponding author), Chinese Univ Hong Kong, Dept Geog & Resource Management, Shatin, Hong Kong, Peoples R China.; Liu, Y (corresponding author), Chinese Univ Hong Kong, Shenzhen Res Inst, Shenzhen 518057, Peoples R China.	liuye@cuhk.edu.hk	Ye, Liu/J-2787-2019	Ye, Liu/0000-0003-2511-5413; Shen, Jianfa/0000-0003-4110-0561	Research Grants Council of HongKongHong Kong Research Grants Council [CUHK449013]; China Ministry of EducationMinistry of Education, China [11JJDZH006]; National Natural Science Foundation of ChinaNational Natural Science Foundation of China (NSFC) [41329001, 41501151]; National Key Technology R&D Program of ChinaNational Key Technology R&D Program [2012BAI32B07]; Research Centre for Urban and Re…	The authors gratefully acknowledge the funding from Research Grants Council of HongKong (No. CUHK449013), China Ministry of Education (No. 11JJDZH006), National Natural Science Foundation of China (No. 41329001, 41501151), and National Key Technology R&D Program of China (2012BAI32B07). We would also like to thank Jonathan Corcoran, Alessandra Faggian, Francisco Rowe, and two anonymous reviewers …	Bell M, 2002, J R STAT SOC A STAT, V165, P435, DOI 10.1111/1467-985X.t01-1-00247; Berck P, 2016, REG STUD, V50, P757, DOI 10.1080/00343404.2014.931935; Busch O, 2010, ANN REGIONAL SCI, V44, P559, DOI 10.1007/s00168-008-0274-3; Chan KW, 2008, CHINA QUART, P582, DOI 10.1017/S0305741008000787; Cheng S, 2007, SOCIOL METHOD RES, V35, P583, DOI 10.1177/0049124106292361; Cooke TJ, 2011, EDUC EVAL POLICY…	47	25	26	12	65	SPRINGER	NEW YORK	ONE NEW YORK PLAZA, SUITE 4600, NEW YORK, NY, UNITED STATES	0570-1864	1432-0592		ANN REGIONAL SCI	Ann. Reg. Sci.	NOV	2017	6	59	3
J	Qin, Y; Zhu, HJ				Qin, Yu; Zhu, Hongjia			Run away? Air pollution and emigration interests in China	JOURNAL OF POPULATION ECONOMICS			English	Article						Emigration; Air pollution; China; Online searches	INTERNATIONAL MIGRATION; BRAIN-DRAIN; IMPACT; DETERMINANTS; EXPOSURE; HEALTH	This paper investigates the impact of air pollution on people's interest in emigration. Using an online search index on "emigration" which is positively correlated with its search volume, we develop a city-by-day measurement of people's emigration sentiment. We find that searches on "emigration" will grow by approximately 2.3-4.8% the next day if today's air quality index (AQI) is increased by 10…	[Qin, Yu] Natl Univ Singapore, Dept Real Estate, Singapore, Singapore; [Zhu, Hongjia] Jinan Univ, Inst Econ & Social Res, Guangzhou, Guangdong, Peoples R China	Qin, Y (corresponding author), Natl Univ Singapore, Dept Real Estate, Singapore, Singapore.	rstqyu@nus.edu.sg; zhuhjecon@gmail.com			Ministry of Education, SingaporeMinistry of Education, Singapore [R-297-000-129-133]; National Natural Science Foundation of ChinaNational Natural Science Foundation of China (NSFC) [71603103]	This study was funded by Ministry of Education, Singapore (grant number R-297-000-129-133) and the National Natural Science Foundation of China (grant number 71603103).	Agrawal A, 2011, J URBAN ECON, V69, P43, DOI 10.1016/j.jue.2010.06.003; Askitas N, 2015, INT J MANPOWER, V36, P26, DOI 10.1108/IJM-12-2014-0260; Beine M, 2008, ECON J, V118, P631, DOI 10.1111/j.1468-0297.2008.02135.x; Brandt L., 2008, CHINAS GREAT EC TRAN; Chay KY, 2003, Q J ECON, V118, P1121, DOI 10.1162/00335530360698513; Chen HJ, 2006, J POPUL ECON, V19, P725, DOI 10.1007/s00148-005-0023-1; Ch…	33	25	25	1	44	SPRINGER	NEW YORK	233 SPRING ST, NEW YORK, NY 10013 USA	0933-1433	1432-1475		J POPUL ECON	J. Popul. Econ.	JAN	2018	6	31	1
J	OTEIZA, E				OTEIZA, E			EMIGRATION OF ENGINEERS FROM ARGENTINA - A CASE OF LATIN-AMERICAN BRAIN-DRAIN	INTERNATIONAL LABOUR REVIEW			English	Article																ALMADA M, RECURSOS HUMANOS NIV; Backer G. S, 1964, HUMAN CAPITAL THEORE; Blank D., 1957, DEMAND SUPPLY SCI PE; DELATTES ZR, 1965, CONSECUENCIAS DEMOGR; Harbison Frederick H., 1964, ED MANPOWER EC GROWT; Horowitz Morris, 1962, EMIGRACION PROFESION; *I INT ED, 1964, OP DOORS 1964, P63; *IMM NAT SERV, ANN REP; KIRK D, 1958, MAJOR MIGRATIONS WOR, P19; *NAT SCI F, 1958, SCI MANP B, V8; *NAT SCI F, SCI…	21	6	6	1	3	INT LABOR OFFICE WASHINGTON BRANCH	WASHINGTON	1828 L STREET, NW STE 801, WASHINGTON, DC 20036	0020-7780			INT LABOUR REV	Int. Labour Rev.		1965	1	92	6
J	Benson-Rea, M; Rawlinson, S				Benson-Rea, M; Rawlinson, S			Highly skilled and business migrants: Information processes and settlement outcomes	INTERNATIONAL MIGRATION			English	Article								This paper reports on a research programme that has investigated the migration experiences of highly skilled professional and business migrants to New Zealand. Over a four-year period, five separate studies have been conducted on the stages in the process of migration. The paper sets out a model of the stages of the migration process and the data and analysis which it has guided. Of particular in…	Univ Auckland, Dept Int Business, Auckland 1, New Zealand	Benson-Rea, M (corresponding author), Univ Auckland, Dept Int Business, Auckland 1, New Zealand.		Benson-Rea, Maureen/G-2110-2019	Benson-Rea, Maureen/0000-0002-1102-8266			BENSONREA M, 2000, INTEGRATION HIGHLY S; DALZIEL L, 2002, CHANGES HELP MI 1119; DALZIEL L, 2000, NZ ASS MIGR INV C AU; *DIA, 1996, HIGH HOP SURV QUAL T; DILLON N, 1999, COMPUTERWORLD, V33, P28; Dreyfuss J, 1999, FORTUNE, V140, P60; FINK J, 1999, COMPENSATION BENEFIT, V31, P45; FLETCHER M, 1999, MIGRANT SETTLEME SEP; Frederking LC, 2002, J ECON BEHAV ORGAN, V48, P105, DOI 10.1016/S0167-2681(01)002…	50	24	24	0	10	WILEY	HOBOKEN	111 RIVER ST, HOBOKEN 07030-5774, NJ USA	0020-7985	1468-2435		INT MIGR	Int. Migr.		2003	4	41	2
J	Ingwersen, P; Jacobs, D				Ingwersen, P; Jacobs, D			South African research in selected scientific areas: Status 1981-2000	SCIENTOMETRICS			English	Article							SCIENCE	The paper is a bibliometric study of the publication and citation patterns and impact of South African research 1981-2000 in five selected research fields: Animal Plant sciences; Chemistry; Biochemistry; Microbiology & molecular biology, including genetics; and Physics, excluding Space science. Data are collected from Science Citation Index via the ISI product National Science Indicators. With th…	Royal Sch Lib & Informat Sci, Dept Informat Studies, DK-2300 Copenhagen S, Denmark; Univ Pretoria, Dept Informat Studies, ZA-0002 Pretoria, South Africa	Ingwersen, P (corresponding author), Royal Sch Lib & Informat Sci, Dept Informat Studies, Birketinget 6, DK-2300 Copenhagen S, Denmark.	pi@db.dk					ALABI GA, 1989, INT LIBR REV, V21, P129, DOI 10.1016/0020-7837(89)90037-X; Gaillard J, 2003, INTERDISCIPL SCI REV, V28, P15, DOI 10.1179/030801803225010359; GARFIELD E, 1983, CURRENT CONTENTS, V34; Glanzel W, 2002, SCIENTOMETRICS, V55, P335, DOI 10.1023/A:1020406627944; Jacobs D, 2000, SCIENTOMETRICS, V47, P75, DOI 10.1023/A:1005617825947; KAPLAN D, 1998, INT SCI MIGRATIONS T; LUTJEHARMS JRE, 199…	11	24	25	0	19	SPRINGER	DORDRECHT	VAN GODEWIJCKSTRAAT 30, 3311 GZ DORDRECHT, NETHERLANDS	0138-9130	1588-2861		SCIENTOMETRICS	Scientometrics		2004	4	59	3
J	Schrecker, T; Labonte, R				Schrecker, T; Labonte, R			Taming the brain drain: A challenge for public health systems in Southern Africa	INTERNATIONAL JOURNAL OF OCCUPATIONAL AND ENVIRONMENTAL HEALTH			English	Article						brain drain; southern Africa; workforce; migration; human resources	POOR COUNTRIES; CARE-SYSTEM; CANADA; PHYSICIANS; DOCTORS; CUBA; CITY; MDS	In southern Africa, rapid out-migration of health professionals is compounding the problems of health systems already faced with budget constraints and the impacts of HIV/AIDS. These negative effects are unlikely to be offset by remittances from abroad. The same dynamics that affect the international migration of health professionals operate within nations, for instance as they move from public t…	Univ Saskatchewan, Saskatchewan Populat Hlth & Evaluat Res Unit, Saskatoon, SK S7N 0W0, Canada	Labonte, R (corresponding author), Univ Ottawa, Inst Populat Hlth, 1 Stewart St, Ottawa, ON K1N 6N5, Canada.	rlabonte@uottawa.ca					ADLUNG R, 2002, TRADE HLTH SERVICES, P13; [Anonymous], 2001, WESTERN J MED, V175, P81; BARER M, 1999, 996 HRU U BRIT COL C; Barraclough S, 1999, HEALTH POLICY, V47, P53, DOI 10.1016/S0168-8510(99)00004-4; Barry M, 2000, ANN INTERN MED, V132, P151, DOI 10.7326/0003-4819-132-2-200001180-00010; BUCHAN J, 2000, HLTH SERVICE J 0824, P24; BUCHAN J, 2002, HLTH SERV J 0801, P22; BUCHAN J, 2003, WHOEIPOSD…	66	24	24	0	7	TAYLOR & FRANCIS LTD	ABINGDON	2-4 PARK SQUARE, MILTON PARK, ABINGDON OR14 4RN, OXON, ENGLAND	1077-3525	2049-3967		INT J OCCUP ENV HEAL	Int. J. Occup. Environ. Health	OCT-DEC	2004	4	10	4
J	Xu, Y; Zhang, JH				Xu, Y; Zhang, JH			One size doesn't fit all: Ethics of international nurse recruitment from the conceptual framework of stakeholder interests	NURSING ETHICS			English	Article						ethics; international nurse recruitment; nurse migration	DEVELOPING-COUNTRIES; BRAIN-DRAIN	This theoretical study examines the ethics of international nurse recruitment from the conceptual framework of stakeholder interests. It argues that there are stakeholders at individual, institutional, national and international levels, with overlapping but, more often, different or even conflicting interests. Depending on the interests of given stakeholders, different conclusions regarding the e…	Univ Nevada, Sch Nursing, Las Vegas, NV 89154 USA; Bengbu Med Coll, Bengbu, Anhui, Peoples R China; Hartford Hosp, Hartford, CT 06115 USA	Xu, Y (corresponding author), Univ Nevada, Sch Nursing, 4505 Maryland Pkwy, Las Vegas, NV 89154 USA.	yu.xu@ccmail.nevada.edu					Adams W, 1968, BRAIN DRAIN; Aiken LH, 2004, HEALTH AFFAIR, V23, P69, DOI 10.1377/hlthaff.23.3.69; Brush BL, 2004, HEALTH AFFAIR, V23, P78, DOI 10.1377/hlthaff.23.3.78; Buchan J, 2002, INT RECRUITMENT NURS; Buchan J., 2004, GLOBAL SHORTAGE REGI; Buchan J, 2003, HERE STAY INT NURSES; Choy C. C., 1998, THESIS U CALIFORNIA; *COMM INT MIGR TAL, 1970, MOD MIGR TAL; *DEP HLTH, 2004, COD PRACT NHS EMPL I…	30	24	24	0	4	SAGE PUBLICATIONS LTD	LONDON	1 OLIVERS YARD, 55 CITY ROAD, LONDON EC1Y 1SP, ENGLAND	0969-7330	1477-0989		NURS ETHICS	Nurs. Ethics	NOV	2005	5	12	6
J	Chikanda, A				Chikanda, A			Skilled health professionals' migration and its impact on health delivery in Zimbabwe	JOURNAL OF ETHNIC AND MIGRATION STUDIES			English	Article; Proceedings Paper	Conference on Migration and Health in Southern Africa	JAN 27-29, 2003	CapeTown, SOUTH AFRICA	Univ of Oxford, Transnat Comm Programme, Queen's Univ, SE African Migrat Programme, Univ of Cape Town, Fac of Humanities		brain drain; migration; health; Zimbabwe	INTERNATIONAL MIGRATION	The paper investigates the magnitude of migration of health professionals from Zimbabwe, the causes of such movements and the associated impacts on health care delivery International migration of health professionals has led to staff shortages and the situation is worse in public compared to private health institutions. The quality of care given to patients has also declined. The research calls f…	Univ Zimbabwe, Dept Geog & Environm Sci, Harare, Zimbabwe	Chikanda, A (corresponding author), Univ Zimbabwe, Dept Geog & Environm Sci, POB MP 167,Mt Plesant, Harare, Zimbabwe.	achikanda@arts.uz.ac.zw	Chikanda, Abel/L-6264-2015	Chikanda, Abel/0000-0001-7146-7976			Adepoju A., 1995, MIGRATION EXPERIENCE; BLOOM G, 2001, AFRICA POLICY DEV RE, V1, P7; Bundred PE, 2000, LANCET, V356, P245, DOI 10.1016/S0140-6736(00)02492-2; Castles S, 1999, INT MIGR, V37, P5, DOI 10.1111/1468-2435.00064; Chasokela C, 2001, AFRICA POLICY DEV RE, V1, P1; *CSO, 1999, ZIMB FACTS FIG; DZIRUTWE F, 2002, SUNDAY MAIL 0610; *ECA IDRC IOM, 2000, REG REP BRAIN DRAIN; GAIDZANWA R, 1999, VO…	20	24	27	0	1	ROUTLEDGE JOURNALS, TAYLOR & FRANCIS LTD	ABINGDON	4 PARK SQUARE, MILTON PARK, ABINGDON OX14 4RN, OXFORDSHIRE, ENGLAND	1369-183X			J ETHN MIGR STUD	J. Ethn. Migr. Stud.	MAY	2006	5	32	4
J	Poutvaara, P				Poutvaara, Panu			Public and private education in an integrated Europe: Studying to migrate and teaching to stay?	SCANDINAVIAN JOURNAL OF ECONOMICS			English	Article; Proceedings Paper	CESifo Area Conference on Employment and Social Protection	MAY 18-20, 2007	Munich, GERMANY			public education; private education; migration; European Union; common labor market	FISCAL COMPETITION; BRAIN-DRAIN; MOBILITY; INVESTMENT; GROWTH; LABOR	This paper investigates public and private choices between internationally applicable and country-specific education when graduates are mobile. Human capital depends on innate skills and study effort with either type of education. It is shown that national governments provide too few students with internationally applicable education, and too many with country-specific education. This effect is m…	Univ Helsinki, FI-00014 Helsinki, Finland	Poutvaara, P (corresponding author), Univ Helsinki, FI-00014 Helsinki, Finland.	panu.poutvaara@helsinki.fi	Poutvaara, Panu/AAW-4491-2020	Poutvaara, Panu/0000-0003-2070-784X			Andersson F, 2003, INT TAX PUBLIC FINAN, V10, P211, DOI 10.1023/A:1023862229689; Becker G.S., 1993, HUMAN CAPITAL THEORE; Beine M, 2001, J DEV ECON, V64, P275, DOI 10.1016/S0304-3878(00)00133-4; Bhagwati J., 1974, J DEV ECON, V1, P19, DOI DOI 10.1016/0304-3878(74)90020-0; BHAGWATI JN, 1982, J PUBLIC ECON, V18, P291, DOI 10.1016/0047-2727(82)90034-2; Desai MA, 2004, INT TAX PUBLIC FINAN, V11, P663…	22	24	24	0	8	WILEY-BLACKWELL	MALDEN	COMMERCE PLACE, 350 MAIN ST, MALDEN 02148, MA USA	0347-0520			SCAND J ECON	Scand. J. Econ.		2008	5	110	3
J	Ifanti, AA; Argyriou, AA; Kalofonou, FH; Kalofonos, HP				Ifanti, Amalia A.; Argyriou, Andreas A.; Kalofonou, Foteini H.; Kalofonos, Haralabos P.			Physicians' brain drain in Greece: A perspective on the reasons why and how to address it	HEALTH POLICY			English	Article						Financial crisis; Austerity; Brain drain; Health care; Physicians; Greece	HEALTH; MIGRATION	This review study explores the "brain drain" currently evident amongst physicians in Greece, which is closely linked to the country's severe financial woes. In particular, it shows that the Greek healthcare labour market offers few opportunities and thus physicians are forsaking their homeland to seek jobs abroad. The main causes generating or greatly inflating the brain drain of Greek physicians…	[Ifanti, Amalia A.] Univ Patras, Dept Educ Sci & Early Childhood Educ, Rion, Greece; [Argyriou, Andreas A.; Kalofonos, Haralabos P.] Univ Hosp Patras, Div Oncol, Dept Med, Rion, Greece; [Kalofonou, Foteini H.] Univ Patras, Sch Med, GR-26110 Patras, Greece	Ifanti, AA (corresponding author), Univ Patras, Dept Educ Sci & Early Childhood Educ, Univ Campus, Rion 26504, Greece.	ifanti@upatras.gr		Kalofonos, Haralabos/0000-0002-3286-778X			Agwu K, 2009, LANCET, V373, P1665, DOI 10.1016/S0140-6736(09)60927-2; [Anonymous], 2013, EUROPEAN SOC RESIDEN; BORSCHSUPAN A, 2005, HLTH AGEING RETIREME; Cervantes M., 2002, OECD OBSERVER; Dente KM, 2007, CELL, V129, P15, DOI 10.1016/j.cell.2007.03.012; Detsch R., 2011, BRAIN DRAIN GREECE; Dreesch N, 2005, HEALTH POLICY PLANN, V20, P267, DOI 10.1093/heapol/czi036; Duran J, 2013, EUROFOUND EUROPEA…	41	24	24	1	17	ELSEVIER IRELAND LTD	CLARE	ELSEVIER HOUSE, BROOKVALE PLAZA, EAST PARK SHANNON, CO, CLARE, 00000, IRELAND	0168-8510	1872-6054		HEALTH POLICY	Health Policy	AUG	2014	5	117	2
J	Collier, P; Hoeffler, A; Pattillo, C				Collier, P; Hoeffler, A; Pattillo, C			Africa's exodus: Capital flight and the brain drain as portfolio decisions	JOURNAL OF AFRICAN ECONOMIES			English	Article; Proceedings Paper	Meeting on African Economic Research Consortia (AERC)	DEC 08, 2002	Durban, SOUTH AFRICA				ECONOMIC-GROWTH; COUNTRIES	We build a data set on financial and human capital flight for 48 countries for the period 1970-98 and analyse capital flight as a portfolio choice. Financial capital flight is measured as the stock of capital flight relative to domestically held private net wealth and human capital flight as the proportion of a country's educated population that is living outside the country. Our results suggest …	World Bank, Washington, DC 20433 USA; Int Monetary Fund, Washington, DC 20431 USA	Collier, P (corresponding author), World Bank, 1818 H St NW, Washington, DC 20433 USA.						Ajayi S. I., 2000, EXTERNAL DEBT CAPITA; BARRO RJ, 1993, J MONETARY ECON, V32, P363, DOI 10.1016/0304-3932(93)90023-9; BARRO RJ, 2000, 42 HARV CTR INT DEV; BEVAN DL, 1990, CONTROLLED OPEN EC; Boyce JK, 2001, J DEV STUD, V38, P27, DOI 10.1080/00220380412331322261; Carrington W., 1998, 98102 IMF; Chang PHK, 1997, INT J FINANC ECON, V2, P101, DOI 10.1002/(SICI)1099-1158(199704)2:2<101::AID-JFE38>3.0…	26	23	24	0	12	OXFORD UNIV PRESS	OXFORD	GREAT CLARENDON ST, OXFORD OX2 6DP, ENGLAND	0963-8024			J AFR ECON	J. Afr. Econ.		2004	4	13			2
J	Desai, MA; Kapur, D; McHale, J				Desai, MA; Kapur, D; McHale, J			Sharing the spoils: Taxing international human capital flows	INTERNATIONAL TAX AND PUBLIC FINANCE			English	Article						migration; tax policy; brain drain; international taxation	COUNTRY; IMPACT	This paper argues that cross-border human capital flows from developing countries to developed countries over the next half-century will demand a new set of policy responses from developing countries. The paper examines the forces that are making immigration policies more skill-focused, the effect of both flows ( emigration) and stocks (diasporas) on the source countries, and the range of taxatio…	Harvard Univ, Boston, MA 02163 USA; NBER, Boston, MA 02163 USA; Harvard Univ, Dept Govt, Cambridge, MA 02138 USA; Queens Univ, Kingston, ON, Canada	Desai, MA (corresponding author), Harvard Univ, Soldiers Field Rd, Boston, MA 02163 USA.	mdesai@hbs.edu; dkapur@latte.harvard.edu; jmchale@business.queensu.ca					ACEMOGLU D, 1999, 7444 NBER; ALTONJI J, 1991, EFFECTS IMMIGRATION; Banerjee AV, 2000, Q J ECON, V115, P989, DOI 10.1162/003355300554962; Bauer T. K., 2000, 187 IZA; Bhagwati J.N., 1989, INCOME TAXATION INT; BHAGWATI JN, 1984, WELTWIRTSCH ARCH, V120, P678, DOI 10.1007/BF02706510; BORJAS G, 1990, FRIENDS STANGERS IMP; Borjas G. J., 1999, HEAVENS DOOR IMMIGRA; Borjas GJ, 1996, REV ECON STAT, V78, P1…	56	23	23	0	4	SPRINGER	DORDRECHT	VAN GODEWIJCKSTRAAT 30, 3311 GZ DORDRECHT, NETHERLANDS	0927-5940	1573-6970		INT TAX PUBLIC FINAN	Int. Tax Public Financ.	SEP	2004	4	11	5
J	Tienda, M; Niu, SXC				Tienda, M; Niu, SXC			Flagships, feeders, and the Texas top 10% law: A test of the "brain drain" hypothesis	JOURNAL OF HIGHER EDUCATION			English	Article								Using a representative sample of Texas public high school seniors to determine whether the top 10% law fostered a "brain drain," crowding out high performing graduates from the most competitive secondary schools in favor of top-ranked students from low performing schools, we find no empirical support for a "brain drain" due to crowding.	Princeton Univ, Off Populat Res, Princeton, NJ 08544 USA	Tienda, M (corresponding author), Princeton Univ, Off Populat Res, Princeton, NJ 08544 USA.						Bowen W. G., 1998, SHAPE RIVER LONG TER; Coleman JS, 1990, EQUALITY ACHIEVEMENT; FAULKNER LR, 2000, SAN ANTONIO EXP 1025, pB5; FAULKNER LR, 2002, US TODAY 0405, pA11; FLORES M, 2003, SAN ANTONIO EXP 0926, pB1; GLATER JD, 2004, NY TIMES 0613, pA1; GOODMAN K, 2003, DIVERSITY DIGEST, V7, P1; IRVING C, 2004, NATL CROSSTALK, V12, P15; *ITOPA, 2003, INC FRESHM CLASS U T; JAYSON S, 2003, AUSTIN AM STATE…	33	23	23	0	0	OHIO STATE UNIV PRESS	COLUMBUS	1050 CARMACK RD, COLUMBUS, OH 43210 USA	0022-1546			J HIGH EDUC	J. High. Educ.	JUL-AUG	2006	5	77	4
J	Fan, CS; Stark, O				Fan, C. Simon; Stark, Oded			The brain drain, ' educated unemployment ', human capital formation, and economic betterment	ECONOMICS OF TRANSITION			English	Article						brain drain; human capital formation; ' educated unemployment '; overeducation; social welfare	GROWTH; MIGRATION	Extending both the 'harmful brain drain' literature and the 'beneficial brain gain' literature, this paper analyzes both the negative and the positive impact of migration by skilled individuals in a unified framework. The paper extends the received literature on the 'harmful brain drain' by showing that in the short run, international migration can result in 'educated unemployment' and overeducat…	Lingnan Univ, Tuen Mun, Hong Kong, Peoples R China; Univ Klagenfurt, Klagenfurt, Austria; Warsaw Univ, Warsaw, Poland; ESCE Econ & Social Res Ctr, Cologne, Germany; ESCE Econ & Social Res Ctr, Eisenstadt, Austria; Univ Bonn, D-5300 Bonn, Germany; Univ Vienna, A-1010 Vienna, Austria	Fan, CS (corresponding author), Lingnan Univ, Tuen Mun, Hong Kong, Peoples R China.	fansimon@ln.edu.hk; ostark@uni-bonn.de		Fan, Simon/0000-0003-0955-5523			Acemoglu D, 1998, Q J ECON, V113, P1055, DOI 10.1162/003355398555838; AZARIADIS C, 1990, Q J ECON, V105, P501, DOI 10.2307/2937797; Beine M, 2001, J DEV ECON, V64, P275, DOI 10.1016/S0304-3878(00)00133-4; Bhagwati J.N., 1989, INCOME TAXATION INT; BOUCHER S, 2007, EVIDENCE RURAL MEXIC; Fan CS, 2007, J DEV ECON, V83, P76, DOI 10.1016/j.jdeveco.2006.05.002; Fan CS, 2004, J ECON BEHAV ORGAN, V55, P27…	23	23	23	0	11	WILEY-BLACKWELL PUBLISHING, INC	MALDEN	COMMERCE PLACE, 350 MAIN ST, MALDEN 02148, MA USA	0967-0750			ECON TRANSIT	Econ. Transit.		2007	5	15	4
J	Dodani, S; LaPorte, RE				Dodani, Sunita; LaPorte, Ronald E.			Ways to strengthen research capacity in developing countries: effectiveness of a research training workshop in Pakistan	PUBLIC HEALTH			English	Article						research capacity; training; developing countries; brain drain	HEALTH RESEARCH; BRAIN-DRAIN	Background: Developing countries are currently facing the burden of both communicable and non-communicable diseases. Physician-scientists, trained in patient care and research skills, are crucial in performing cutting-edge clinical research in developing countries. A major, unmet challenge has been lack of local expertise and the increasing problem of 'brain drain'. Objective: The objective of th…	[Dodani, Sunita] Med Coll Georgia, Augusta, GA 30912 USA; [LaPorte, Ronald E.] Univ Pittsburgh, Grad Sch Publ Hlth, Pittsburgh, PA USA	Dodani, S (corresponding author), Med Coll Georgia, Hlth Sci Bldg,997 St Sebastian Way,Room 4503, Augusta, GA 30912 USA.	sdodani@mcg.edu					Aslam Fawad, 2005, J Pak Med Assoc, V55, P517; Commission on Health Research for Development, 1990, ESS NAT HLTH RES; CONWAY MA, 1991, J EXP PSYCHOL GEN, V120, P395; DeBourgh GA, 2003, J PROF NURS, V19, P149, DOI 10.1016/S8755-7223(03)00072-3; Dodani S, 2005, J ROY SOC MED, V98, P487, DOI 10.1258/jrsm.98.11.487; Global Forum for Health Research, 2002, 10 90 REP HLTH RES 2; *GOV PAK MIN HLTH, 1997…	25	23	24	0	2	W B SAUNDERS CO LTD	LONDON	32 JAMESTOWN RD, LONDON NW1 7BY, ENGLAND	0033-3506			PUBLIC HEALTH	Public Health	JUN	2008	5	122	6
J	Hawkes, M; Kolenko, M; Shockness, M; Diwaker, K				Hawkes, Michael; Kolenko, Mary; Shockness, Michelle; Diwaker, Krishna			Nursing brain drain from India	HUMAN RESOURCES FOR HEALTH			English	Article							MIGRATION; NURSES	In response to recent findings regarding migration of health workers out of Africa, we provide data from a survey of Indian nurses suggesting that up to one fifth of the nursing labour force may be lost to wealthier countries through circular migration.	[Hawkes, Michael] Univ Toronto, Inst Med Sci, Toronto, ON M5S 1A1, Canada; [Kolenko, Mary] Univ Toronto, Fac Nursing, Toronto, ON M5S 1A1, Canada; [Shockness, Michelle] Urban Promise, Toronto, ON, Canada; [Diwaker, Krishna] Malankara Orthodox Syrian Church Med Coll, Dept Pediat, Dept Neonatol, Kolencherry, India	Hawkes, M (corresponding author), Univ Toronto, Inst Med Sci, Toronto, ON M5S 1A1, Canada.	michael.hawkes@utoronto.ca; mary.kolenko@gmail.com; michelle@urbanpromise.com; krishnadiwakar@hotmail.com	, Michael/AAP-3049-2020				Aboul-Enein Faisal H, 2002, Int J Nurs Pract, V8, P228, DOI 10.1046/j.1440-172X.2002.00370.x; Dicicco-Bloom Barbara, 2004, J Transcult Nurs, V15, P26, DOI 10.1177/1043659603260029; Kaushik M, 2008, B WORLD HEALTH ORGAN, V86, P40, DOI 10.2471/BLT.07.041681; Khadria B, 2007, HEALTH SERV RES, V42, P1429, DOI 10.1111/j.1475-6773.2007.00718.x; Khadria Binod., 2004, OECD SCI TECHNOLOGY, V2004/7; Kingma…	11	23	23	0	5	BIOMED CENTRAL LTD	LONDON	CURRENT SCIENCE GROUP, MIDDLESEX HOUSE, 34-42 CLEVELAND ST, LONDON W1T 4LB, ENGLAND	1478-4491			HUM RESOUR HEALTH	Hum. Resour. Health	37288	2009	5	7
J	Klein, D; Hofmeister, M; Lockyer, J; Crutcher, R; Fidler, H				Klein, Douglas; Hofmeister, Marianna; Lockyer, Jocelyn; Crutcher, Rodney; Fidler, Herta			Push, Pull, and Plant: The Personal Side of Physician Immigration to Alberta, Canada	FAMILY MEDICINE			English	Article							BRAIN-DRAIN; MIGRATION; COMMUNITIES; CHALLENGE	Background and Objectives: The global migration of/physicians has led many international physicians to enter practice in Alberta, Canada. The study was designed to explore the personal side of migration and transition experiences of these international medical graduates (IMGs). Methods: A qualitative study using telephone interviews and a semi-structured interview guide was used to interview 19 I…	[Klein, Douglas] Univ Alberta, Dept Family Med, Edmonton, AB, Canada; [Hofmeister, Marianna; Lockyer, Jocelyn] Univ Calgary, Dept Community Hlth Sci, Calgary, AB T2N 1N4, Canada; [Crutcher, Rodney] Univ Calgary, Dept Family Med, Calgary, AB T2N 1N4, Canada; [Fidler, Herta] Univ Calgary, Off Continuing Med Educ & Profess Dev, Calgary, AB T2N 1N4, Canada	Klein, D (corresponding author), Univ Alberta, Dept Family Med, Edmonton, AB, Canada.	doug.klein@ualberta.ca					Bates J, 2001, ACAD MED, V76, P43, DOI 10.1097/00001888-200101000-00012; Boulet JR, 2006, HEALTH AFFAIR, V25, P469, DOI 10.1377/hlthaff.25.2.469; BOYD M, 1989, INT MIGR REV, V23, P638, DOI 10.2307/2546433; Brettell C, 2000, MIGRATION THEORY TAL; Brown RPC, 2004, SOC SCI MED, V58, P2193, DOI 10.1016/j.socscimed.2003.08.020; CORBIN J, 1990, Z SOZIOL, V19, P418, DOI 10.1007/BF00988593; Cresswell J, …	18	23	23	0	12	SOC TEACHERS FAMILY MEDICINE	LEAWOOD	11400 TOMAHAWK CREEK PARKWAY, STE 540, LEAWOOD, KS 66207 USA	0742-3225			FAM MED	Fam. Med.	MAR	2009	5	41	3
J	Abramitzky, R				Abramitzky, Ran			The effect of redistribution on migration: Evidence from the Israeli kibbutz	JOURNAL OF PUBLIC ECONOMICS			English	Article						Migration; Redistribution; Selection; Brain drain; Adverse selection	SELF-SELECTION; UNITED-STATES; EARNINGS; WAGES; MARKET; INCENTIVES; IMMIGRANTS; RATES; MODEL	This paper tests a key theoretical prediction of public finance, that local redistribution induces sorting of the population so that less productive individuals are located in communities with more redistribution. Specifically, I use a longitudinal data set to test whether and to what extent the intensive redistribution practiced by Israeli kibbutzim encourages exit of more productive individuals…	Stanford Univ, Stanford, CA 94305 USA	Abramitzky, R (corresponding author), Stanford Univ, Stanford, CA 94305 USA.	ranabr@stanford.edu					Abramitzky R, 2008, Q J ECON, V123, P1111, DOI 10.1162/qjec.2008.123.3.1111; Abramitzky R, 2006, J ECON HIST, V66, P882, DOI 10.1017/S0022050706000362; BORJAS G, 1991, IMMIGRATION TRADE LA; BORJAS GJ, 1992, J URBAN ECON, V32, P159, DOI 10.1016/0094-1190(92)90003-4; BORJAS GJ, 1987, AM ECON REV, V77, P531; BORJAS GJ, 1994, J ECON LIT, V32, P1667; Burda MC, 1998, J APPL ECONOM, V13, P525, DOI 10.10…	37	23	23	0	15	ELSEVIER SCIENCE SA	LAUSANNE	PO BOX 564, 1001 LAUSANNE, SWITZERLAND	0047-2727			J PUBLIC ECON	J. Public Econ.	APR	2009	5	93	43924
J	Chan, SJ				Chan, Sheng-Ju			Shifting Patterns of Student Mobility in Asia	HIGHER EDUCATION POLICY			English	Article						student mobility; international students; TNHE; regionalization; brain drain	HIGHER-EDUCATION; OVERSEAS	During the past decade, Asia - traditionally one of the largest exporters of mobile students - has experienced major changes in student mobility within higher education. As the worldwide competition for international students has escalated, many Asian countries have adopted a wide range of mechanisms and strategies in facilitating student mobility. This paper argues that although most Asian natio…	Natl Chung Cheng Univ, Grad Inst Educ, Minhsiung Township 62102, Chiayi County, Taiwan	Chan, SJ (corresponding author), Natl Chung Cheng Univ, Grad Inst Educ, 168 Univ Rd, Minhsiung Township 62102, Chiayi County, Taiwan.	ju1207@ccu.edu.tw		Chan, Sheng-Ju/0000-0003-3830-5304			Adnett N, 2010, J EDUC POLICY, V25, P625, DOI 10.1080/02680931003782827; Agarwal P., 2007, HIGHER ED NEW CENTUR, P109; ALTBACH PG, 1981, TEACH COLL REC, V82, P600; ALTBACH PG, 1986, TEACH COLL REC, V87, P589; Altbach PG, 2009, ASIA PAC EDUC REV, V10, P15, DOI 10.1007/s12564-009-9000-9; Banks M., 2007, GLOBAL STUDENT MOBIL; British Council, 2008, INT STUD MOB E AS EX; Chan S.J., 2011, AAS C 31 MAR…	38	23	23	1	26	PALGRAVE MACMILLAN LTD	BASINGSTOKE	BRUNEL RD BLDG, HOUNDMILLS, BASINGSTOKE RG21 6XS, HANTS, ENGLAND	0952-8733	1740-3863		HIGH EDUC POLICY	High Educ. Policy	JUN	2012	5	25	2
J	Nair, M; Webster, P				Nair, Manisha; Webster, Premila			Health professionals migration in emerging market economies: patterns, causes and possible solutions	JOURNAL OF PUBLIC HEALTH			English	Article						education; employment and skills; health services; public health	HUMAN-RESOURCES; BRAIN-DRAIN; MEDICAL-EDUCATION; CARE; PHILIPPINES; CHALLENGES; METRICS; WORKERS; TALENT; INDIA	About a third of the countries affected by shortage of human resources for health are the emerging market economies (EMEs). The greatest shortage in absolute terms was found to be in India and Indonesia leading to health system crisis. This review identifies the patterns of migration of health workers, causes and possible solutions in these EMEs. A qualitative synthesis approach based on the ocri…	[Nair, Manisha; Webster, Premila] Univ Oxford, Dept Publ Hlth, Oxford OX3 7LF, England; [Nair, Manisha] Indian Inst Publ Hlth, Delhi, India	Nair, M (corresponding author), Univ Oxford, Dept Publ Hlth, Rosemary Rue Bldg,Old Rd Campus, Oxford OX3 7LF, England.	dr.manisha.das@gmail.com		Nair, Manisha/0000-0003-0660-5054	Oxford University	The first author was supported by Oxford University for conducting the literature review for a background paper for the Emerging Market Economies Symposium on which this article is based.	Adams RH, 2005, WORLD DEV, V33, P1645, DOI 10.1016/j.worlddev.2005.05.004; Adkoli VB, 2006, REG HLTH FORUM, V10, P49; Agwu K, 2009, LANCET, V373, P1665, DOI 10.1016/S0140-6736(09)60927-2; Ahmad OB, 2005, BRIT MED J, V331, P43, DOI 10.1136/bmj.331.7507.43; Alonso-Garbayo A, 2009, HUM RESOUR HEALTH, V7, DOI 10.1186/1478-4491-7-37; Astor A, 2005, SOC SCI MED, V61, P2492, DOI 10.1016/j.socscimed.2005…	65	23	23	1	30	OXFORD UNIV PRESS	OXFORD	GREAT CLARENDON ST, OXFORD OX2 6DP, ENGLAND	1741-3842	1741-3850		J PUBLIC HEALTH-UK	J. Public Health	MAR	2013	5	35	1
J	Marmolejo-Leyva, R; Perez-Angon, MA; Russell, JM				Marmolejo-Leyva, Rafael; Angel Perez-Angon, Miguel; Russell, Jane M.			Mobility and International Collaboration: Case of the Mexican Scientific Diaspora	PLOS ONE			English	Article							INDIAN SCIENTISTS; RESEARCH OUTPUT; BRAIN-DRAIN; DETERMINANTS; COUNTRY; CHINA	We use a data set of Mexican researchers working abroad that are included in the Mexican National System of Researchers (SNI). Our diaspora sample includes 479 researchers, most of them holding postdoctoral positions in mainly seven countries: USA, Great Britain, Germany, France, Spain, Canada and Brazil. Their research output and impact is explored in order to determine their patterns of product…	[Marmolejo-Leyva, Rafael] Cinvestav IPN, PhD Program Sci Technol & Soc, Mexico City 07360, DF, Mexico; [Angel Perez-Angon, Miguel] Cinvestav IPN, Dept Phys, Mexico City 07360, DF, Mexico; [Russell, Jane M.] Univ Nacl Autonoma Mexico, Bibliotecol & Informat Res Inst, Mexico City 04510, DF, Mexico	Perez-Angon, MA (corresponding author), Cinvestav IPN, Dept Phys, Mexico City 07360, DF, Mexico.	mperez@fis.cinvestav.mx	Perez Angon, Miguel Angel/L-4313-2017	Perez Angon, Miguel Angel/0000-0003-3029-6861	ConacytConsejo Nacional de Ciencia y Tecnologia (CONACyT) [220066]	Conacyt grant 220066.	Adams J, 2012, NATURE, V490, P335, DOI 10.1038/490335a; Arellanes A, 2014, COMMUNICATION; Basu A, 2014, COLLNET J SCIENTOMET, V8, P169, DOI 10.1080/09737766.2014.916860; Basu A, 2013, SCIENTOMETRICS, V94, P1007, DOI 10.1007/s11192-012-0800-z; Cho A, 2004, SCIENCE, V304, P1286, DOI 10.1126/science.304.5675.1286; de Arenas JL, 2001, RES EVALUAT, V10, P115, DOI 10.3152/147154401781777079; Didou S, 2…	27	23	24	0	42	PUBLIC LIBRARY SCIENCE	SAN FRANCISCO	1160 BATTERY STREET, STE 100, SAN FRANCISCO, CA 94111 USA	1932-6203			PLOS ONE	PLoS One	38504	2015	6	10	6
J	Cooray, A; Schneider, F				Cooray, Arusha; Schneider, Friedrich			Does corruption promote emigration? An empirical examination	JOURNAL OF POPULATION ECONOMICS			English	Article						Corruption; Emigration; Educational attainment	INTERNATIONAL MIGRATION; DETERMINANTS; INEQUALITY; PULL; PUSH	This paper investigates the effects of corruption on the emigration rate of low-, medium- and high-skilled individuals at the country level. Fixed-effects, system generalized method of moments (GMM) and instrumental variable estimations are used to establish a causal relationship between emigration and corruption. The empirical results indicate that as corruption increases, the emigration rate of…	[Cooray, Arusha] Univ Nottingham, Sch Business, Semenyih 43500, Selangor Darul, Malaysia; [Schneider, Friedrich] Johannes Kepler Univ Linz, Dept Econ, A-4040 Linz, Austria	Cooray, A (corresponding author), Univ Nottingham, Sch Business, Semenyih 43500, Selangor Darul, Malaysia.	Arusha.Cooray@nottingham.edu.my; friedrich.schneider@jku.at	Cooray, Arusha/Q-1232-2016; Cooray, Arusha/X-1507-2019	Cooray, Arusha/0000-0001-8809-9188; Cooray, Arusha/0000-0001-8809-9188			Acemoglu D, 2001, AM ECON REV, V91, P1369, DOI 10.1257/aer.91.5.1369; Acemoglu D, 2005, HANDB ECON, V22, P385; Ahlin C, 2008, J DEV ECON, V86, P414, DOI 10.1016/j.jdeveco.2007.07.002; Aidt TS, 2003, ECON J, V113, pF632, DOI 10.1046/j.0013-0133.2003.00171.x; ARELLANO M, 1995, J ECONOMETRICS, V68, P29, DOI 10.1016/0304-4076(94)01642-D; Ariu A., 2014, GOVERNANCE QUA UNPUB; Ariu A, 2013, 10 IRES CATH…	57	23	23	0	39	SPRINGER	NEW YORK	ONE NEW YORK PLAZA, SUITE 4600, NEW YORK, NY, UNITED STATES	0933-1433	1432-1475		J POPUL ECON	J. Popul. Econ.	JAN	2016	6	29	1
J	Cooper, RA				Cooper, RA			Physician migration: A challenge for America, a challenge for the world	JOURNAL OF CONTINUING EDUCATION IN THE HEALTH PROFESSIONS			English	Article						physician migration; brain-drain; access to care; physician shortages; physician workforce	UNITED-STATES; EMIGRATION	For five decades, medical education policy in the United States has been built around the expectation that, if too few physicians were produced, additional physicians would be available from other countries. That policy is examined in the context of the desire for an ever-increasing number of physicians who will provide an ever-expanding array of services in the future. This reality is juxtaposed…	Med Coll Wisconsin, Hlth Policy Inst, Milwaukee, WI 53226 USA	Cooper, RA (corresponding author), Med Coll Wisconsin, Hlth Policy Inst, 8701 Watertown Plank Rd, Milwaukee, WI 53226 USA.						BUCHAN J, AC 2004 ANN RES M; Bundred PE, 2000, LANCET, V356, P245, DOI 10.1016/S0140-6736(00)02492-2; Cooper RA, 2004, ANN INTERN MED, V141, P705, DOI 10.7326/0003-4819-141-9-200411020-00012; Cooper RA, 2002, HEALTH AFFAIR, V21, P140, DOI 10.1377/hlthaff.21.1.140; Cooper RA, 2003, HEALTH AFFAIR, V22, P71, DOI 10.1377/hlthaff.22.4.71; Cooper RA, 2003, HEALTH SERV RES, V38, P675, DOI 10.1111/1475-6…	21	22	22	0	2	JOHN WILEY & SONS INC	HOBOKEN	111 RIVER ST, HOBOKEN, NJ 07030 USA	0894-1912			J CONTIN EDUC HEALTH	J. Contin. Educ. Health Prof.	WIN	2005	5	25	1
J	Le, T				Le, Thanh			'Brain drain' or 'brain circulation': Evidence from OECD's international migration and R&D spillovers	SCOTTISH JOURNAL OF POLITICAL ECONOMY			English	Article							ECONOMIC-GROWTH; TECHNOLOGY; TRADE; FLOWS	This paper empirically investigates whether labour mobility can transfer technology across borders based on the panel cointegration method. Estimates of specifications on a cross-section of 19 OECD countries during 1980-1990 lend strong support to this thesis. Data indicate that international labour movement may help transfer technology across borders in both directions: from donor countries to h…	Univ Queensland, St Lucia, Qld 4072, Australia	Le, T (corresponding author), Univ Queensland, St Lucia, Qld 4072, Australia.			Le, Thanh/0000-0002-1665-7926			AGHION P, 1992, ECONOMETRICA, V60, P323, DOI 10.2307/2951599; Aghion P., 1998, ENDOGENOUS GROWTH TH; Beine M, 2001, J DEV ECON, V64, P275, DOI 10.1016/S0304-3878(00)00133-4; BENHABIB J, 1994, J MONETARY ECON, V34, P143, DOI 10.1016/0304-3932(94)90047-7; Bils M, 2000, AM ECON REV, V90, P1160, DOI 10.1257/aer.90.5.1160; COE DT, 1995, EUR ECON REV, V39, P859, DOI 10.1016/0014-2921(94)00100-E; DELAFU…	36	22	24	2	11	WILEY	HOBOKEN	111 RIVER ST, HOBOKEN 07030-5774, NJ USA	0036-9292	1467-9485		SCOT J POLIT ECON	Scott. J. Polit. Econ.	NOV	2008	5	55	5
J	Gozu, A; Kern, DE; Wright, SM				Gozu, Aysegul; Kern, David E.; Wright, Scott M.			Similarities and Differences Between International Medical Graduates and US Medical Graduates at Six Maryland Community-Based Internal Medicine Residency Training Programs	ACADEMIC MEDICINE			English	Article							UNITED-STATES; COMMUNICATION-SKILLS; NATIONAL-SURVEY; BRAIN-DRAIN; WORKFORCE; PHYSICIANS; EDUCATION; AMERICA; HEALTH; DIRECTORS	Purpose Approximately 25% of practicing physicians in the United States are graduates of medical schools in other countries; they are called international medical graduates (IMGs). Their transition into the U.S. health care system may be difficult and challenging. This study sought to identify the similarities and differences between IMGs and U.S. medical graduates (USMGs) working together in res…	[Gozu, Aysegul; Kern, David E.; Wright, Scott M.] Johns Hopkins Univ, Sch Med, Dept Gen Internal Med, Baltimore, MD USA; [Gozu, Aysegul] Franklin Sq Hosp Ctr, Baltimore, MD USA	Gozu, A (corresponding author), 9105 Franklin Sq Dr,Suite 312, Baltimore, MD 21237 USA.	aysegul.gozu@medstar.net					Accreditation Council for Graduate Medical Education, ACGME OUTC PROJ; Akl EA, 2007, J GEN INTERN MED, V22, P264, DOI 10.1007/s11606-006-0022-2; *AM MED ASS, INT MED GRAD US WORK; Baer L. D., 2001, FEWER INT MED GRADUA; Baer LD, 2003, HEALTH PLACE, V9, P291, DOI 10.1016/S1353-8292(02)00062-X; Baer LD, 1998, MED CARE, V36, P1534, DOI 10.1097/00005650-199811000-00003; Baer LD, 1999, AM J PUBLIC HEA…	55	22	25	0	8	LIPPINCOTT WILLIAMS & WILKINS	PHILADELPHIA	530 WALNUT ST, PHILADELPHIA, PA 19106-3621 USA	1040-2446			ACAD MED	Acad. Med.	MAR	2009	5	84	3
J	Weinberg, BA				Weinberg, Bruce A.			Developing science: Scientific performance and brain drains in the developing world	JOURNAL OF DEVELOPMENT ECONOMICS			English	Article; Proceedings Paper	Conference on Globalization and the Brain Drain - Theory, Evidence and Policy	DEC 09-11, 2008	Hebrew Univ, Jerusalem, ISRAEL	Bar llan Univ	Hebrew Univ	Science of science; Development; Brain drain; Innovation	RETURNS; GROWTH	Establishing a strong scientific community is important as countries develop and requires both producing and retaining of important scientists. We show that developing countries produce a sizeable number of important scientists, but that they experience a tremendous brain drain. Education levels, population, and per capita GDP are positively related to the number of important scientists born in a…	[Weinberg, Bruce A.] Ohio State Univ, IZA, Columbus, OH 43215 USA; [Weinberg, Bruce A.] NBER, Columbus, OH 43215 USA	Weinberg, BA (corresponding author), Ohio State Univ, IZA, 1945 N High St, Columbus, OH 43215 USA.	weinberg.27@osu.edu		Weinberg, Bruce/0000-0001-8856-1803	NIA NIH HHSUnited States Department of Health & Human ServicesNational Institutes of Health (NIH) - USANIH National Institute on Aging (NIA) [P01 AG039347] Funding Source: Medline		Acemoglu D, 2001, AM ECON REV, V91, P1369, DOI 10.1257/aer.91.5.1369; Aghion Phillipe, 2004, ANAL EC, V3; [Anonymous], 2008, SCI ENG IND 2008, P1; Barro R. J., 2000, INT DATA ED ATTAINME; Beine M, 2001, J DEV ECON, V64, P275, DOI 10.1016/S0304-3878(00)00133-4; Beine M., 2008, 3398 IZA; Belot Michele V.K., 2008, IMMIGRANT SELECTION; Ben-David Daniel, 2008, BRAINS DRAINED TALE; BHAGWATI J, 1976, BR…	45	22	22	0	16	ELSEVIER	AMSTERDAM	RADARWEG 29, 1043 NX AMSTERDAM, NETHERLANDS	0304-3878	1872-6089		J DEV ECON	J. Dev. Econ.	MAY	2011	5	95	1
J	Tannock, S				Tannock, Stuart			Points of Prejudice: Education-Based Discrimination in Canada's Immigration System	ANTIPODE			English	Article						brain drain; education-based discrimination; high skill migration; immigration policy; immigrant rights; managed migration	BRAIN-DRAIN; SKILLED MIGRANTS; GENDER; MIGRATION; POLICIES; WORKERS; GROWTH; STATE; LABOR; RACE	Education and skill are increasingly used by states around the world as a central organizing principle in the regulation of migration flows. Immigration theorists have often claimed that use of education and skill to determine "who should get in" to a country is nondiscriminatory, innocent and legitimate. Using the example of Canadian immigration policy, this article argues in contrast that skill…	Cardiff Univ, Wales Inst Social & Econ Res & Data, Cardiff CF10 3BB, S Glam, Wales	Tannock, S (corresponding author), Cardiff Univ, Wales Inst Social & Econ Res & Data, 46 Pk Pl, Cardiff CF10 3BB, S Glam, Wales.	stannock@gmail.com			Economic and Social Research CouncilEconomic & Social Research Council (ESRC) [ES/F034180/1] Funding Source: Researchfish		Abu-Laban Y., 1998, CANADIAN ETHNIC STUD, V30, P190; Abu-Laban Y., 2002, SELLING DIVERSITY; Akbari AH, 1999, INT MIGR REV, V33, P156, DOI 10.2307/2547326; Arat-Koc S, 1999, J CAN STUD, V34, P31, DOI 10.3138/jcs.34.2.31; ARATKOC S, 1999, CANADIAN WOMAN STUDI, V19, P18; ARATKOC S, 1997, NOT ONE FAMILY FOREI, P53; Attaran A, 2008, CAN MED ASSOC J, V178, P265, DOI 10.1503/cmaj.071733; Avery D, 1995, …	153	22	22	0	31	WILEY	HOBOKEN	111 RIVER ST, HOBOKEN 07030-5774, NJ USA	0066-4812	1467-8330		ANTIPODE	Antipode	SEP	2011	5	43	4
J	de la Croix, D; Docquier, F				de la Croix, David; Docquier, Frederic			Do brain drain and poverty result from coordination failures?	JOURNAL OF ECONOMIC GROWTH			English	Article						Brain drain; Development; Multiple equilibria; Coordination failure	HUMAN-CAPITAL FORMATION; MIGRATION; EDUCATION; ALLOCATION; ECONOMIES; GROWTH; INCOME	The bidirectional causal links between high-skilled emigration and poverty can give rise to multiple equilibria and coordination failures. Two countries sharing identical characteristics may end up in either a "low poverty-low brain drain" equilibrium or in a "high poverty-high brain drain" equilibrium. In this paper, we build a model which endogenizes high-skilled emigration and economic perform…	[de la Croix, David] IRES, B-1348 Louvain, Belgium; [de la Croix, David] UCLouvain, CORE, B-1348 Louvain, Belgium; [Docquier, Frederic] Natl Fund Sci Res, B-1348 Louvain, Belgium; [Docquier, Frederic] UCLouvain, IRES, B-1348 Louvain, Belgium	de la Croix, D (corresponding author), IRES, B-1348 Louvain, Belgium.		de la Croix, David/E-4677-2013	de la Croix, David/0000-0002-7589-8535			ACEMOGLU D, 1995, EUR ECON REV, V39, P17, DOI 10.1016/0014-2921(94)00014-Q; ACEMOGLU D, 2000, NBER MACROECONOMIC A, V15; Angrist JD, 1995, AM ECON REV, V85, P1065; AZARIADIS C, 1990, Q J ECON, V105, P501, DOI 10.2307/2937797; Barret A, 2001, INT MOBILITY HIGHLY; Barro RJ, 2001, OXFORD ECON PAP, V53, P541, DOI 10.1093/oep/53.3.541; Beine M, 2001, J DEV ECON, V64, P275, DOI 10.1016/S0304-3878(00)00…	45	22	22	0	23	SPRINGER	DORDRECHT	VAN GODEWIJCKSTRAAT 30, 3311 GZ DORDRECHT, NETHERLANDS	1381-4338	1573-7020		J ECON GROWTH	J. Econ. Growth	MAR	2012	5	17	1
J	Docquier, F; Rapoport, H; Salomone, S				Docquier, Frederic; Rapoport, Hillel; Salomone, Sara			Remittances, migrants' education and immigration policy: Theory and evidence from bilateral data	REGIONAL SCIENCE AND URBAN ECONOMICS			English	Article						Remittances; Migration; Brain drain; Immigration policy	INTERNATIONAL MIGRATION; SELF-SELECTION; BRAIN-DRAIN	We investigate the relationship between remittances and migrants' education both theoretically and empirically, using original bilateral remittance data. At a theoretical level we lay out a model of remittances interacting migrants' human capital with two dimensions of immigration policy: restrictiveness, and selectivity. The model predicts that the relationship between remittances and migrants' …	[Docquier, Frederic; Salomone, Sara] Catholic Univ Louvain, IRES, Louvain, Belgium; [Rapoport, Hillel] Bar Ilan Univ, Dept Econ, IL-52100 Ramat Gan, Israel; [Rapoport, Hillel] Univ Lille, EQUIPPE, Lille, France; [Rapoport, Hillel] Harvard Univ, Ctr Int Dev, Cambridge, MA 02138 USA; [Salomone, Sara] Tor Vergata Univ, Rome, Italy	Docquier, F (corresponding author), Catholic Univ Louvain, IRES, Louvain, Belgium.	frederic.docquier@uclouvain.be; hillel@mail.biu.ac.il; sara.salomone@uclouvain.be					Ashraf Nava, 2010, REMITTANCES PROBLEM; Basok T, 2000, INT MIGR, V38, P215, DOI 10.1111/1468-2435.00108; Beine M, 2007, WORLD BANK ECON REV, V21, P249, DOI 10.1093/wber/lhm007; Beine M, 2011, J DEV ECON, V95, P30, DOI 10.1016/j.jdeveco.2009.11.004; Belot M., SCANDINAVIAN J EC; Belot M, 2012, J POPUL ECON, V25, P1077, DOI 10.1007/s00148-011-0356-x; Bollard A, 2011, WORLD BANK ECON REV, V25, P132, …	38	22	23	0	34	ELSEVIER SCIENCE BV	AMSTERDAM	PO BOX 211, 1000 AE AMSTERDAM, NETHERLANDS	0166-0462	1879-2308		REG SCI URBAN ECON	Reg. Sci. Urban Econ.	SEP	2012	5	42	5
J	Labrianidis, L; Vogiatzis, N				Labrianidis, Lois; Vogiatzis, Nikos			Highly Skilled Migration: What Differentiates the "Brains' Who Are Drained from Those Who Return in the Case of Greece?	POPULATION SPACE AND PLACE			English	Article						highly skilled migration; brain drain; return migration; development; south-eastern Europe; Greece	MIGRANT REMITTANCES; GROWTH; GEOGRAPHY	The migration of highly educated population (brain drain) poses extremely significant impacts on origin countries' development, especially in cases in which, owing to their economic and social structures, these countries cannot promote the efficient allocation of their professionals. At the same time, the decision of those migrants to return home or remain abroad is affected by several factors. T…	[Labrianidis, Lois] Univ Macedonia, Dept Econ, Reg Dev & Policy Res Unit, Thessaloniki, Greece; [Vogiatzis, Nikos] Univ Thessaly, Dept Planning & Reg Dev, Volos, Greece	Labrianidis, L (corresponding author), Univ Macedonia, Dept Econ, Reg Dev & Policy Res Unit, Thessaloniki, Greece.	loisl@uom.gr					Avveduto S, 2001, EVOLUTION THEORIES B; Beine M, 2001, J DEV ECON, V64, P275, DOI 10.1016/S0304-3878(00)00133-4; Bhagwati J., 1973, WORLD DEV, V1, P94, DOI DOI 10.1016/0305-750X(73)90224-6; Bhagwati Jagdish N., 1976, BRAIN DRAIN TAXATION, V2; Carrington W., 1998, 98102 IMF; Carrington William J, 1999, FINANC DEV, V36, P46; Coutsoumaris G., 1968, BRAIN DRAIN, P166; Crubel H, 1966, AM ECON REV, V90…	47	22	24	0	33	WILEY	HOBOKEN	111 RIVER ST, HOBOKEN 07030-5774, NJ USA	1544-8444	1544-8452		POPUL SPACE PLACE	Popul. Space Place.	SEP	2013	5	19	5
J	Sjoquist, DL; Winters, JV				Sjoquist, David L.; Winters, John V.			Merit aid and post-college retention in the state	JOURNAL OF URBAN ECONOMICS			English	Article						College education; Merit aid; Migration; Retention; Brain drain	QUALITY-OF-LIFE; HIGHER-EDUCATION; FINANCIAL-AID; IN-DIFFERENCES; SMART CITIES; BRAIN-DRAIN; HOPE; SCHOLARSHIP; MIGRATION; INFERENCE	One goal of state merit-based financial aid programs is to increase the stock of college-educated labor in the state by retaining college-educated persons in the state after college. However, there has been surprisingly little research on whether state merit aid programs are effective at this goal. This paper investigates the effect of state merit aid programs on the post-college location of 24-3…	[Sjoquist, David L.] Georgia State Univ, Andrew Young Sch Policy Studies, Atlanta, GA 30303 USA; [Winters, John V.] Oklahoma State Univ, Spears Sch Business, Stillwater, OK 74078 USA; [Winters, John V.] IZA, Bonn, Germany	Winters, JV (corresponding author), Oklahoma State Univ, Spears Sch Business, Stillwater, OK 74078 USA.	sjoquist@gsu.edu; jvwinte@okstate.edu		Winters, John/0000-0002-0542-1416			Abel JR, 2012, J ECON GEOGR, V12, P667, DOI 10.1093/jeg/lbr020; Albouy D., 2012, ARE BIG CITIES UNPUB; Bertrand M, 2004, Q J ECON, V119, P249, DOI 10.1162/003355304772839588; Bound J, 2004, J ECONOMETRICS, V121, P143, DOI 10.1016/j.jeconom.2003.10.012; Bruce D.J., 2013, WORKING PAPER; Cameron AC, 2008, REV ECON STAT, V90, P414, DOI 10.1162/rest.90.3.414; Conley TG, 2011, REV ECON STAT, V93, P113,…	38	22	22	2	27	ACADEMIC PRESS INC ELSEVIER SCIENCE	SAN DIEGO	525 B ST, STE 1900, SAN DIEGO, CA 92101-4495 USA	0094-1190	1095-9068		J URBAN ECON	J. Urban Econ.	MAR	2014	5	80
[truncated: 970 more rows]
[truncated: 18 more columns]
